# Supplementary material for: Fates of imine intermediates in radical cyclizations of N-sulfonylindoles and ene-sulfonamides
Source: publisher site journal article supplement (doi:10.3762/bjoc.11.181), 2015-09-17

# Supporting Information

for

**Fates of imine intermediates in radical cyclizations of *N*-sulfonylindoles and ene-sulfonamides**

Hanmo Zhang, E. Ben Hay, Stephen J. Geib and Dennis P. Curran\*

Address: Department of Chemistry, University of Pittsburgh, Pittsburgh, PA 15260, USA

Email: Dennis P. Curran - [curran@pitt.edu](mailto:curran@pitt.edu)

\*Corresponding author

## **Experimental procedures, compound characterization data, and copies of NMR spectra**

### **Table of Contents**

|                                                             |     |
|-------------------------------------------------------------|-----|
| General remarks.....                                        | S2  |
| Experimental procedures and compound characterization ..... | S3  |
| References.....                                             | S20 |
| Copies of spectra .....                                     | S21 |

**General Remarks:** Chemicals and solvents were purchased from commercial suppliers and used as received, except as follows. Dichloromethane, THF, ether, and toluene were dried by passing through an activated alumina column. All reactions were carried out under an inert atmosphere of dry argon, unless otherwise indicated.

All reactions were followed by TLC or  $^1\text{H}$  NMR spectroscopy. TLC visualizations were performed by illumination with a UV lamp (254 nm) or staining with a phosphomolybdic acid solution in ethanol and heating. Flash chromatographies were performed with a automated flash chromatography instrument and prepacked columns containing 230-400 mesh silica gel.

$^1\text{H}$  NMR spectra were recorded at 300, 400, 500 and 600 MHz in  $\text{CDCl}_3$ , and chemical shifts were measured relative to tetramethylsilane ( $\delta$  0.00 ppm) or residual solvent peak ( $\delta$  7.26 ppm).  $^{13}\text{C}$  NMR spectra were recorded at 75, 100, 125, 150 MHz in  $\text{CDCl}_3$ , and chemical shifts were measured relative to residual solvent peak ( $\delta$  77.0 ppm). Unless otherwise noted, NMR spectra were recorded at 293 K. The following abbreviations were used to describe coupling: s = singlet, d = doublet, t = triplet, q = quartet, m = multiplet, br = broad. IR spectra were recorded as thin films ( $\text{CHCl}_3$ ) or neat on NaCl plates on an FTIR spectrometer.

Aldehyde **6** was prepared using published procedures, and the spectral data matched the reported ones.<sup>1</sup> 1-(Phenylsulfonyl)-2,3-dihydro-1*H*-pyrrole **20** was prepared using published procedures.<sup>2</sup>

## Experimental Procedures and Compound Characterization

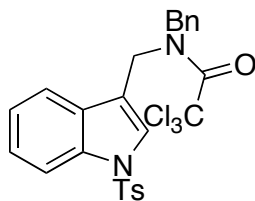

***N*-Benzyl-2,2,2-trichloro-*N*-((1-tosyl-1*H*-indol-3-yl)methyl)acetamide (3):** The title compound was prepared as a mixture of 2.5:1 rotamers:  $^1\text{H}$  NMR (300 MHz,  $\text{CDCl}_3$ )  $\delta$  major rotamer: 4.87 (s, 2H), 4.73 (s, 2H); minor rotamer: 4.99 (s, 2H), 4.66 (s, 2H); overlapping signals: 8.04 (d,  $J = 7.8$  Hz, 1H), 7.78 (d,  $J = 7.8$  Hz, 2H), 7.45–7.12 (m, 10H), 2.37 (s, 3H). The above spectral data were identical to those reported.<sup>3</sup>

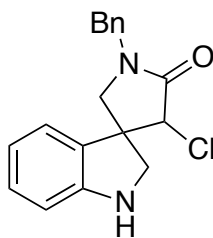

**1'-Benzyl-4'-chlorospiro[indoline-3,3'-pyrrolidin]-5'-one (5b):** A mixture of tin hydride (110  $\mu\text{L}$ , 0.411 mmol), AIBN (17 mg, 0.102 mmol), and trichloroacetamide **3** (110 mg, 0.205 mmol) in benzene (10 mL) was refluxed for 30 min. The solvent was evaporated and the residue was purified by flash chromatography (silica gel, 30% EtOAc/hexanes) to provide the title compound (33 mg, 51%) as a colorless oil:  $^1\text{H}$  NMR (300 MHz,  $\text{CDCl}_3$ )  $\delta$  7.39–7.26 (m, 5H), 7.18–7.10 (m, 2H), 6.74 (td,  $J = 7.5$  Hz, 1.0 Hz, 1H), 6.68 (d,  $J = 7.5$  Hz, 1H), 4.63 (d,  $J = 14.4$  Hz, 1H), 4.53 (d,  $J = 14.4$  Hz, 1H), 4.45 (s, 1H), 3.77 (brs, 1H), 3.75 (d,  $J = 10.2$  Hz, 1H), 3.63 (d,  $J = 9.6$  Hz, 1H), 3.48 (d,  $J = 9.6$  Hz, 1H), 3.25 (d,  $J = 10.2$  Hz, 1H);  $^{13}\text{C}$  NMR (75 MHz,  $\text{CDCl}_3$ )  $\delta$

169.3, 151.6, 135.4, 129.5, 128.9, 128.3, 128.1, 126.6, 125.6, 118.8, 110.1, 61.5, 58.6, 55.0, 52.2, 47.2; FTIR (thin film, CH<sub>2</sub>Cl<sub>2</sub>, cm<sup>-1</sup>) 3334, 3030, 2922, 2856, 1701, 1607, 1486, 1465, 1257, 742; HRMS (TOF ES) *m/z* calcd for C<sub>18</sub>H<sub>17</sub>N<sub>2</sub>ONaCl, 335.0927 [M+Na]<sup>+</sup>, found: 335.0916.

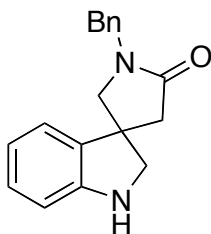

**1'-Benzylspiro[indoline-3,3'-pyrrolidin]-5'-one (5c):** A mixture of tin hydride (150  $\mu$ L, 0.560 mmol), AIBN (4 mg, 0.023 mmol), and trichloroacetamide **3** (50 mg, 0.093 mmol) in benzene (10 mL) was refluxed for 30 min. The solvent was evaporated and the residue was purified by flash chromatography (silica gel, 75% EtOAc/hexanes) to provide the title compound (20 mg, 78%) as a colorless oil: <sup>1</sup>H NMR (300 MHz, CDCl<sub>3</sub>)  $\delta$  7.37–7.25 (m, 5H), 7.06 (d, *J* = 8.4 Hz, 2H), 6.75 (t, *J* = 7.8 Hz, 1H), 6.65 (d, *J* = 7.8 Hz, 1H), 4.62 (d, *J* = 14.4 Hz, 1H), 4.41 (d, *J* = 14.4 Hz, 1H), 3.75 (brs, 1H), 3.50 (d, *J* = 14.4 Hz, 1H), 3.48 (d, *J* = 14.4 Hz, 1H), 3.39 (d, *J* = 13.8 Hz, 1H), 3.36 (d, *J* = 13.8 Hz, 1H), 2.87 (d, *J* = 16.8 Hz, 1H), 2.65 (d, *J* = 16.8 Hz, 1H); <sup>13</sup>C NMR (75 MHz, CDCl<sub>3</sub>)  $\delta$  173.0, 150.7, 136.2, 132.5, 128.8, 128.6, 128.3, 127.8, 122.1, 119.3, 110.0, 60.6, 58.3, 46.7, 45.8, 44.0; FTIR (thin film, CH<sub>2</sub>Cl<sub>2</sub>, cm<sup>-1</sup>) 3336, 2920, 2855, 1680, 1608, 1488, 1256, 745, 702; HRMS (TOF ES) *m/z* calcd for C<sub>18</sub>H<sub>18</sub>N<sub>2</sub>ONa, 301.1317 [M+Na]<sup>+</sup>, found: 301.1304.

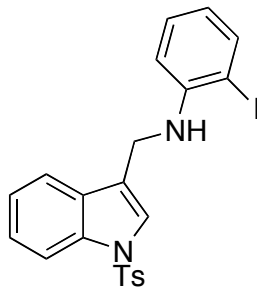

**2-Iodo-N-((1-tosyl-1H-indol-3-yl)methyl)aniline (S1):** 2-Iodoaniline (241 mg, 1.10 mmol), acetic acid (60 mg, 1.00 mmol), and sodium triacetoxyborohydride (637 mg, 3.00 mmol) were added to a stirred solution of 1-tosyl-1H-indole-3-carbaldehyde **6** (300 mg, 1.00 mmol) in 1,2-dichloroethane (8 mL). After 12 h, the reaction was quenched with a saturated NaHCO<sub>3</sub> solution and the aqueous layer was extracted with 1,2-dichloroethane. The combined organic layer was washed with brine, dried with MgSO<sub>4</sub>, and concentrated *in vacuo*. The residue was purified by flash chromatography (silica gel, 15% EtOAc/hexanes) to give the title compound (330 mg, 66%) as a colorless oil: <sup>1</sup>H NMR (300 MHz, CDCl<sub>3</sub>) δ 8.01 (d, *J* = 8.1 Hz, 1H), 7.73–7.69 (m, 3H), 7.58 (d, *J* = 7.8 Hz, 1H), 7.51 (s, 1H), 7.36 (td, *J* = 7.8 Hz, 1.2 Hz, 1H), 7.27 (m, 1H), 7.22–7.14 (m, 3H), 6.58 (dd, *J* = 8.1 Hz, 1.2 Hz, 1H), 6.50 (td, *J* = 7.5 Hz, 1.2 Hz, 1H), 4.54–4.47 (m, 3H), 2.35 (s, 3H); <sup>13</sup>C NMR (75 MHz, CDCl<sub>3</sub>) δ 146.9, 145.0, 139.1, 135.6, 135.1, 129.9, 129.6, 126.9, 125.1, 124.2, 123.4, 119.9, 119.6, 119.2, 114.0, 111.1, 85.6, 40.2, 21.6; FTIR (thin film, CH<sub>2</sub>Cl<sub>2</sub>, cm<sup>-1</sup>) 3394, 3061, 2921, 1589, 1502, 1448, 1367, 1277, 1173, 1121, 1005, 970, 810, 744; HRMS (EI) *m/z* calcd for C<sub>22</sub>H<sub>19</sub>N<sub>2</sub>O<sub>2</sub>SI, 502.0212 [M]<sup>+</sup>, found: 502.0198.

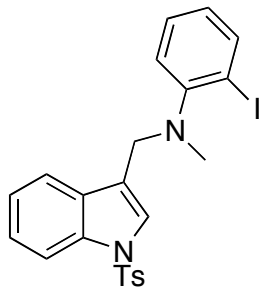

**2-Iodo-N-methyl-N-((1-tosyl-1H-indol-3-yl)methyl)aniline (7):** A NaHMDS solution (450  $\mu$ L, 1M in THF) was added dropwise to a solution of aniline **S1** (150 mg, 0.30 mmol) in THF (5 mL) at  $-78$   $^{\circ}$ C. After 30 min, iodomethane (46  $\mu$ L, 0.75 mmol) was added dropwise at this temperature. The reaction mixture was then stirred at room temperature for 12 h. A saturated aqueous NaHCO<sub>3</sub> solution was added, and the aqueous layer was extracted with diethyl ether. The combined organic layer was washed with brine, dried over MgSO<sub>4</sub>, and concentrated *in vacuo*. The residue was purified by flash chromatography (silica gel, 20% EtOAc/hexanes) to afford the title compound (140 mg, 91%) as a colorless oil: <sup>1</sup>H NMR (300 MHz, CDCl<sub>3</sub>)  $\delta$  7.97 (d,  $J$  = 8.1 Hz, 1H), 7.88 (dd,  $J$  = 7.8 Hz, 1.2 Hz, 1H), 7.70 (d,  $J$  = 8.1 Hz, 2H), 7.60–7.54 (m, 2H), 7.32–7.17 (m, 5H), 7.02 (dd,  $J$  = 8.1 Hz, 1.2 Hz, 1H), 6.80 (t,  $J$  = 7.8 Hz, 1H), 4.24 (s, 2H), 2.67 (s, 3H), 2.33 (s, 3H); <sup>13</sup>C NMR (75 MHz, CDCl<sub>3</sub>)  $\delta$  153.8, 144.8, 140.3, 135.4, 135.3, 130.6, 129.9, 129.1, 126.8, 125.7, 125.4, 124.8, 123.1, 122.2, 120.6, 119.5, 113.7, 98.6, 51.7, 42.4, 21.7; FTIR (thin film, CH<sub>2</sub>Cl<sub>2</sub>, cm<sup>-1</sup>) 3053, 2947, 1596, 1470, 1446, 1367, 1173, 1119, 1093, 978, 812, 747, 702; HRMS (TOF ES)  $m/z$  calcd for C<sub>23</sub>H<sub>22</sub>N<sub>2</sub>O<sub>2</sub>SI, 517.0447 [M+H]<sup>+</sup>, found: 517.0460.

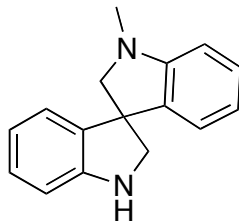

**1-Methyl-3,3'-spirobi[indoline] (8):** A mixture of aryl iodide **7** (70 mg, 0.136 mmol), tributyltin hydride (91  $\mu\text{L}$ , 0.340 mmol) and AIBN (7 mg, 0.040 mmol) in benzene (13 mL) was refluxed for 20 min. TLC suggested the starting material was not completely consumed. Tin hydride (163  $\mu\text{L}$ , 0.610 mmol) was added in two portions with a catalytic amount of AIBN. After 20 min, the solvent was evaporated, and the residue was purified by flash chromatography (silica gel, 20% EtOAc/hexanes) to provide the title compound (15 mg, 47%) as a colorless oil:  $^1\text{H}$  NMR (600 MHz,  $\text{CDCl}_3$ )  $\delta$  7.18 (t,  $J = 7.8$  Hz, 1H), 7.11 (t,  $J = 7.8$  Hz, 1H), 7.04 (d,  $J = 7.8$  Hz, 1H), 7.01 (d,  $J = 7.8$  Hz, 1H), 6.77–6.72 (m, 3H), 6.60 (d,  $J = 7.8$  Hz, 1H), 3.78 (d,  $J = 9.0$  Hz, 1H), 3.63 (d,  $J = 9.0$  Hz, 1H), 3.62 (d,  $J = 9.0$  Hz, 1H), 3.27 (d,  $J = 9.0$  Hz, 1H), 2.82 (s, 3H);  $^{13}\text{C}$  NMR (75 MHz,  $\text{CDCl}_3$ )  $\delta$  153.1, 151.4, 135.3, 134.1, 128.4, 128.2, 124.1, 123.6, 119.3, 118.6, 109.7, 107.5, 68.9, 60.3, 54.5, 36.1; FTIR (thin film,  $\text{CH}_2\text{Cl}_2$ ,  $\text{cm}^{-1}$ ) 3374, 3046, 2949, 2853, 2805, 1606, 1487, 1463, 1295, 1252, 1151, 1121, 1021, 745; HRMS (EI)  $m/z$  calcd for  $\text{C}_{16}\text{H}_{16}\text{N}_2$ , 236.1313  $[\text{M}]^+$ , found: 236.1313.

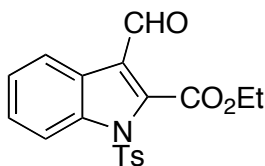

**Ethyl 3-formyl-1-tosyl-1H-indole-2-carboxylate (9):** Ethyl 3-formyl-1H-indole-2-carboxylate (150 mg, 0.69 mmol) and tosyl chloride (197 mg, 1.04 mmol) were added to a stirred suspension of  $\text{Cs}_2\text{CO}_3$  (675 mg, 2.07 mmol) in DMF (4 mL). After 30 min, the reaction was quenched with a

saturated aqueous  $\text{NH}_4\text{Cl}$  solution, and the aqueous layer was extracted with EtOAc. The combined organic layer was washed with brine, dried over  $\text{MgSO}_4$ , and concentrated *in vacuo*. The crude product was purified by flash chromatography (silica gel, 15% EtOAc/hexanes) to afford the title compound (75 mg, 29%) as a colorless oil:  $^1\text{H}$  NMR (400 MHz,  $\text{CDCl}_3$ )  $\delta$  10.16 (s, 1H), 8.29 (d,  $J = 8.0$  Hz, 1H), 8.02–7.98 (m, 3H), 7.46 (td,  $J = 7.6$  Hz, 1.2 Hz, 1H), 7.38 (td,  $J = 7.6$  Hz, 1.2 Hz, 1H), 7.32 (d,  $J = 8.0$  Hz, 2H), 4.61 (q,  $J = 7.2$  Hz, 2H), 2.39 (s, 3H), 1.50 (t,  $J = 7.2$  Hz, 3H);  $^{13}\text{C}$  NMR (100 MHz,  $\text{CDCl}_3$ )  $\delta$  185.3, 161.1, 146.4, 139.3, 135.3, 134.4, 130.2, 127.9, 127.8, 127.4, 125.7, 125.3, 123.1, 120.9, 114.2, 63.7, 21.9, 14.2; FTIR (thin film,  $\text{CH}_2\text{Cl}_2$ ,  $\text{cm}^{-1}$ ) 2924, 2360, 1734, 1680, 1545, 1380, 1321, 1268, 1206, 1179, 1141, 1111, 1086, 1015, 986, 817, 749; HRMS (TOF ES)  $m/z$  calcd for  $\text{C}_{19}\text{H}_{17}\text{NO}_5\text{NaS}$ , 394.0725  $[\text{M}+\text{Na}]^+$ , found: 394.0699.

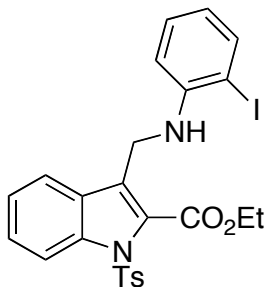

**Ethyl 3-((2-iodophenylamino)methyl)-1-tosyl-1H-indole-2-carboxylate (S2):** A mixture of aldehyde **9** (66 mg, 0.178 mmol), 2-iodoaniline (43 mg, 0.195 mmol), anhydrous  $\text{MgSO}_4$  (64 mg, 0.533 mmol), and pyridinium *p*-toluenesulfonate (13 mg, 0.053 mmol) in  $\text{CH}_2\text{Cl}_2$  (2 mL) was stirred for 12 h. The reaction was quenched with a saturated aqueous  $\text{NaHCO}_3$  solution, and the aqueous layer was extracted with  $\text{CH}_2\text{Cl}_2$ . The combined organic layer was washed with brine, dried over  $\text{MgSO}_4$ , and concentrated *in vacuo*. The resulting crude imine was dissolved in EtOH (3 mL), and  $\text{NaBH}_4$  (20 mg, 0.533 mmol) was added in one portion. After 3 h, the reaction



was quenched with a saturated aqueous NaHCO<sub>3</sub> solution, and the aqueous layer was extracted with EtOAc. The combined organic layer was washed with brine, dried over MgSO<sub>4</sub>, and concentrated *in vacuo*. The crude product was purified by flash chromatography (silica gel, 15% EtOAc/Hexane) to afford the title compound (65 mg, 64%) as a colorless oil: <sup>1</sup>H NMR (500 MHz, CDCl<sub>3</sub>) δ 8.07 (dd, *J* = 8.0 Hz, 1.0 Hz, 1H), 7.81 (m, 2H), 7.67 (m, 2H), 7.43 (td, *J* = 7.5 Hz, 1.5 Hz, 1H), 7.30 (m, 1H), 7.21 (m, 3H), 6.72 (dd, *J* = 8.0 Hz, 1.5 Hz, 1H), 6.49 (td, *J* = 7.5 Hz, 1.5 Hz, 1H), 4.53 (s, 1H), 4.48 (q, *J* = 7.0 Hz, 1H), 2.34 (s, 3H), 1.39 (t, *J* = 7.0 Hz, 1H); <sup>13</sup>C NMR (100 MHz, CDCl<sub>3</sub>) δ 162.4, 146.8, 145.1, 139.1, 136.8, 134.4, 129.7, 129.6, 129.5, 128.9, 127.2, 126.9, 124.4, 124.3, 120.8, 119.3, 115.5, 110.9, 85.5, 62.6, 39.0, 21.6, 14.0; FTIR (thin film, CH<sub>2</sub>Cl<sub>2</sub>, cm<sup>-1</sup>) 3395, 2982, 1724, 1590, 1503, 1451, 1371, 1312, 1266, 1177, 1006, 814, 746; HRMS (EI) calcd for C<sub>25</sub>H<sub>23</sub>N<sub>2</sub>O<sub>4</sub>SI, 574.0423 [M]<sup>+</sup>, found: 574.0408.

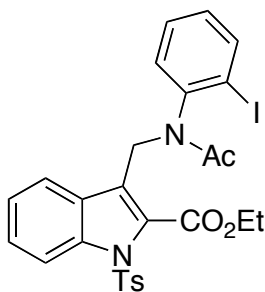

**Ethyl 3-((N-(2-iodophenyl)acetamido)methyl)-1-tosyl-1H-indole-2-carboxylate (10):** DMAP (4 mg, 0.03 mmol), pyridine (19 μL, 0.23 mmol), and acetyl chloride (8 μL, 0.11 mmol) were added to a stirred solution of aniline **S2** (33 mg, 0.057 mmol) in CH<sub>2</sub>Cl<sub>2</sub> (2 mL) at 0 °C. The reaction mixture was then stirred at room temperature for 12 h. It was diluted with CH<sub>2</sub>Cl<sub>2</sub> and a saturated aqueous NaHCO<sub>3</sub> solution was added. The aqueous layer was extracted with EtOAc, and the combined organic layer was washed with brine, dried over MgSO<sub>4</sub>, and concentrated *in vacuo*. The crude product was purified by flash chromatography (silica gel, 25%

EtOAc/hexanes) to afford the title compound (29 mg, 80%) as a colorless oil:  $^1\text{H}$  NMR (400 MHz,  $\text{CDCl}_3$ )  $\delta$  8.00 (d,  $J = 8.0$  Hz, 1H), 7.91 (dd,  $J = 8.0$  Hz, 1.2 Hz, 1H), 7.82 (d,  $J = 8.0$  Hz, 1H), 7.70 (d,  $J = 8.0$  Hz, 2H), 7.41 (t,  $J = 8.0$  Hz, 1H), 7.30-7.27 (m, 1H), 7.19 (d,  $J = 8.0$  Hz, 2H), 7.10 (td,  $J = 7.6$  Hz, 1.2 Hz, 1H), 7.02 (td,  $J = 7.6$  Hz, 1.2 Hz, 1H), 6.40 (dd,  $J = 7.6$  Hz, 1.2 Hz, 1H), 5.74 (d,  $J = 14.4$  Hz, 1H), 4.52 (d,  $J = 14.4$  Hz, 1H), 4.17-4.01 (m, 2H), 2.35 (s, 3H), 1.78 (s, 3H), 1.24 (t,  $J = 7.2$  Hz, 3H);  $^{13}\text{C}$  NMR (100 MHz,  $\text{CDCl}_3$ )  $\delta$  major rotamer: 62.3, 21.6, 13.9; minor rotamer: 60.4, 21.1, 14.2; overlapping signals: 169.9, 161.4, 145.0, 143.0, 140.1, 136.5, 134.5, 131.3, 130.6, 130.0, 129.6, 129.5, 129.0, 127.3, 126.9, 124.6, 122.6, 121.9, 115.1, 100.0, 39.4, 22.8; FTIR (thin film,  $\text{CH}_2\text{Cl}_2$ ,  $\text{cm}^{-1}$ ) 2982, 1723, 1664, 1469, 1372, 1313, 1267, 1177, 1017, 762; HRMS (TOF ES)  $m/z$  calcd for  $\text{C}_{27}\text{H}_{25}\text{N}_2\text{O}_5\text{NaSI}$ , 639.0427  $[\text{M}+\text{Na}]^+$ , found: 639.0479.

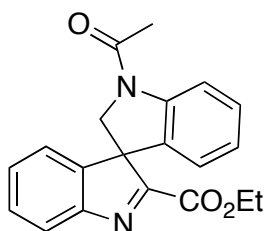

**Ethyl 1'-acetylspiro[indole-3,3'-indoline]-2-carboxylate (11):** In a sealed tube, a mixture of tin hydride (28  $\mu\text{L}$ , 0.11 mmol), AIBN (1 mg, 0.0060 mmol), and aryl iodide **10** (13 mg, 0.021 mmol) in benzene (2 mL) was refluxed for 30 min. The solvent was evaporated and the residue was purified by flash chromatography (silica gel, 60% EtOAc/hexanes) to provide the title compound (5 mg, 71%) as a colorless oil, in a 5:1 ratio of rotamers:  $^1\text{H}$  NMR (400 MHz,  $\text{CDCl}_3$ )  $\delta$  major rotamer: 4.73 (d,  $J = 12.0$  Hz, 1H), 2.28 (s, 3H); minor rotamer: 4.80 (d,  $J = 12.0$  Hz, 1H), 2.59 (s, 3H); overlapping signals: 8.36 (d,  $J = 8.0$  Hz, 1H), 7.90 (d,  $J = 7.6$  Hz, 1H), 7.49 (t,  $J = 7.6$  Hz, 1H), 7.40 (t,  $J = 7.2$  Hz, 1H), 7.32-7.27 (m, 2 H), 6.89 (t,  $J = 7.6$  Hz, 1H), 6.42 (d,  $J$

= 7.6 Hz, 1H), 4.31–4.29 (m, 3H), 1.26 (t,  $J = 7.2$  Hz, 3H);  $^{13}\text{C}$  NMR (100 MHz,  $\text{CDCl}_3$ )  $\delta$  171.3, 168.2, 160.7, 152.6, 145.2, 144.2, 129.8, 129.5, 128.9, 124.0, 123.9, 122.7, 122.3, 118.1, 64.2, 62.3, 55.4, 24.4. 14.0; FTIR (thin film,  $\text{CH}_2\text{Cl}_2$ ,  $\text{cm}^{-1}$ ) 2923, 1722, 1665, 1593, 1482, 1402, 1339, 1267, 1146, 1106, 1021, 754; HRMS (TOF ES)  $m/z$  calcd for  $\text{C}_{20}\text{H}_{18}\text{N}_2\text{O}_3\text{Na}$ , 357.1215  $[\text{M}+\text{Na}]^+$ , found: 357.1239.

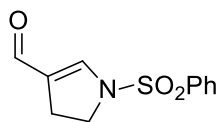

**1-(Phenylsulfonyl)-4,5-dihydro-1H-pyrrole-3-carbaldehyde (S3):** Phosphorous oxychloride (1.21 mL, 12.9 mmol) was added to a solution of DMF (8.4 mL, 10.8 mmol) in CH<sub>2</sub>Cl<sub>2</sub> (8.4 mL) at 0 °C. The solution as stirred at 0 °C for 10 min, then ene-sulfonamide **20** (2.50 g, 10.8mmol) in CH<sub>2</sub>Cl<sub>2</sub> (10 mL) was added. After 10 min, the solution was poured into saturated aqueous K<sub>2</sub>CO<sub>3</sub> (100 mL) and the mixture was stirred vigorously for 1 h. The organic layer was separated, and the aqueous layer was extracted with CH<sub>2</sub>Cl<sub>2</sub>. The combined extracts were dried over MgSO<sub>4</sub> and concentrated. The residue was purification by flash chromatography (20% EtOAc in hexanes) to give the title compound (2.40 g, 94%) as a crystalline solid: mp 76–79 °C. <sup>1</sup>H NMR (500 MHz, CDCl<sub>3</sub>) δ 9.55 (s, 1H), 7.82 (d, *J* = 7.5 Hz, 2H), 7.66 (t, *J* = 7.0 Hz, 1H), 7.57 (t, *J* = 7.5 Hz, 2H), 7.39 (s, 1H), 3.73 (t, *J* = 9.5 Hz, 2H), 2.78 (t, *J* = 9.5 Hz, 2H); <sup>13</sup>C NMR (125 MHz, CDCl<sub>3</sub>) δ 185.4, 147.1, 136.1, 133.9, 129.6, 127.2, 125.8, 48.6, 25.9; HRMS (APCI) *m/z* calcd for C<sub>11</sub>H<sub>12</sub>NO<sub>3</sub>S [M+H]<sup>+</sup> 238.0538, found 238.0552.

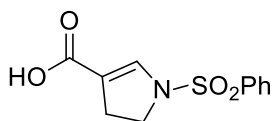

**1-(Phenylsulfonyl)-4,5-dihydro-1H-pyrrole-3-carboxylic acid (21):** NaClO<sub>2</sub> (0.97 g, 8.60 mmol) was added in one portion to a mixture of aldehyde **S3** (3.00 g, 12.6 mmol), 2-methyl-2-butene (25.3 mL, 2M in THF), and NaH<sub>2</sub>PO<sub>4</sub> (7.59 g, 63.22 mmol) in 1,4-dioxane/H<sub>2</sub>O (3:1; 80 mL). The reaction mixture was stirred for 1 h at room temperature. A saturated NaHCO<sub>3</sub> solution (50 mL) was added with precaution to the solution and the final mixture was stirred vigorously

for 30 min. The mixture was concentrated and the residue was dissolved in EtOAc. The organic mixture was washed with 10% HCl and H<sub>2</sub>O, then evaporated under vacuum. The residue was purified by flash chromatography (50% EtOAc in hexanes) to give the title compound (3.02 g, 95%) as a white crystalline solid: mp 145–147 °C; <sup>1</sup>H NMR (400 MHz, CDCl<sub>3</sub>) δ 7.82 (d, *J* = 8.0 Hz, 2H), 7.67 (t, *J* = 7.6 Hz, 1H), 7.58 (t, *J* = 7.6 Hz, 2H), 7.46 (s, 1H), 3.72 (t, *J* = 9.6 Hz, 2H), 2.79 (t, *J* = 9.2 Hz, 2H); <sup>13</sup>C NMR (100 MHz, CDCl<sub>3</sub>) δ 169.2, 142.7, 136.2, 133.8, 129.5, 127.4, 113.5, 48.7, 27.8; HRMS (APCI) *m/z* calcd for C<sub>11</sub>H<sub>12</sub>NO<sub>4</sub>S [M+H]<sup>+</sup> 254.0487, found 254.0510.

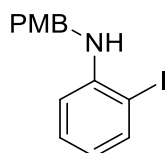

**2-Iodo-*N*-(4-methoxybenzyl)aniline (S4):** NaBH(OAc)<sub>3</sub> (9.67 g, 45.6 mmol) was added to a solution of *p*-anisaldehyde (1.53 mL, 12.6 mmol), 2-iodoaniline (2.5 g, 11.4 mmol) and AcOH (0.11 mL, 0.11 mmol) in 1,2-DCE (60 mL). The mixture was stirred 24 h, then saturated aqueous KHCO<sub>3</sub> (30 mL) was slowly added while stirring vigorously. The aqueous layer was extracted with EtOAc, the combined organic layer was washed with brine, dried over MgSO<sub>4</sub>, and volatile compounds were removed under vacuum. The residue was subjected to flash chromatography (20% EtOAc in hexanes) to give the title compound (3.53 g, 91%). <sup>1</sup>H NMR (400 MHz, CDCl<sub>3</sub>) δ 7.68 (dd, *J* = 8.0 Hz, 1.2 Hz, 1H), 7.29 (d, *J* = 8.8 Hz, 2H), 7.17 (td, *J* = 8.0 Hz, 1.2 Hz, 1H), 6.90 (d, *J* = 8.8 Hz, 2H), 6.56 (dd, *J* = 8.4 Hz, 1.2 Hz, 1H), 6.45 (td, *J* = 8.0 Hz, 1.2 Hz, 1H), 4.54 (s, 1H), 4.33 (s, 2H), 3.81 (s, 3H); <sup>13</sup>C NMR (100 MHz, CDCl<sub>3</sub>) δ 158.9, 147.1, 139.0, 130.5, 129.4, 128.8, 118.7, 114.1, 110.1, 85.3, 55.3, 47.8; HRMS (APCI) *m/z* calcd for C<sub>14</sub>H<sub>13</sub>INO [M-H]<sup>+</sup> 338.0084, found 338.0070.

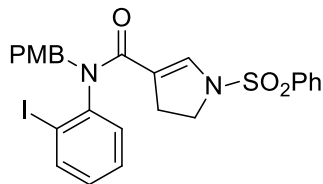

***N*-(2-Iodophenyl)-*N*-(4-methoxybenzyl)-1-(phenylsulfonyl)-4,5-dihydro-1*H*-pyrrole-3-**

**carboxamide (22):** Ghosez reagent (0.15 mL, 1.25 mmol) was added to a suspension of carboxylic acid **21** (317 mg, 1.25 mmol) in toluene (12.5 mL), the mixture was stirred for 1 h. NaHMDS (0.93 mL, 1M in THF) was added to a solution of aniline **S4** (315 mg, 0.93 mmol) in THF (9 mL) at  $-78\text{ }^{\circ}\text{C}$ . The mixture was stirred 30 minutes then cannulated into the stirring acid chloride solution. The mixture was stirred to rt for 3 h. The reaction was quenched with aqueous  $\text{KHCO}_3$ , the aqueous layer was extracted with EtOAc. The combined organic layer was washed with brine, dried over  $\text{MgSO}_4$ , volatile compounds were removed under vacuum. The residue was subjected to flash chromatography (20% EtOAc in hexanes) to give the title compound (320 mg, 60%) as a colorless solid: mp  $53\text{--}56\text{ }^{\circ}\text{C}$ .  $^1\text{H}$  NMR (500 MHz,  $\text{CDCl}_3$ )  $\delta$  7.94 (dd,  $J = 8.0$  Hz, 1.5 Hz, 1H), 7.60–7.57 (m, 1H), 7.49–7.48 (m, 4H), 7.28 (td,  $J = 8.0$  Hz, 1.5 Hz, 1H), 7.18–7.09 (m, 2H), 6.79–6.76 (m, 3H), 5.83 (s, 1H), 5.49 (d,  $J = 14.0$  Hz, 1H), 4.02 (d,  $J = 14.0$  Hz, 1H), 3.75 (s, 3H), 3.45–3.41 (m, 1H), 3.29–3.29 (m, 1H), 2.65 (m, 1H), 2.55 (m, 1H);  $^{13}\text{C}$  NMR (125 MHz,  $\text{CDCl}_3$ )  $\delta$  164.0, 159.0, 144.1, 140.2, 136.7, 135.7, 133.2, 131.1, 130.8, 128.0, 129.3, 129.2, 128.6, 118.1, 113.6, 101.0, 55.1, 52.0, 47.0, 30.8; HRMS (ESI)  $m/z$  calcd for  $\text{C}_{25}\text{H}_{25}\text{IN}_2\text{O}_4\text{S}$   $[\text{M}+\text{H}]^+$  575.2502, found 575.0508.

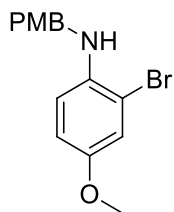

**2-Bromo-4-methoxy-N-(4-methoxybenzyl)aniline (S5):** NaBH(OAc)<sub>3</sub> (5.10 g, 24.1 mmol) was added to a solution of *p*-anisaldehyde (0.41 mL, 6.63 mmol), 2-bromo-4-methoxyaniline<sup>4</sup> (1.5 g, 6.02 mmol) and AcOH (0.11 mL, 1.91 mmol) in 1,2-DCE (30 mL). The mixture was stirred 24 h, then saturated aqueous KHCO<sub>3</sub> (15 mL) was slowly added while stirring vigorously. The aqueous layer was extracted with EtOAc, the combined organic layer was washed with brine, dried over MgSO<sub>4</sub>, and volatile compounds were removed under vacuum. The residue was subjected to flash chromatography (20% EtOAc in hexanes) to give the title compound (2.14 g, 91%) as a white solid: mp 63–64 °C. <sup>1</sup>H NMR (400 MHz, CDCl<sub>3</sub>) δ 7.29 (d, *J* = 6.8 Hz, 2H), 7.08 (d, *J* = 2.4 Hz, 1H), 6.89 (d, *J* = 6.8 Hz 2H), 6.77 (dd, *J* = 7.2 Hz, 2.4 Hz, 1H), 6.58 (d, *J* = 7.2 Hz, 1H), 4.33 (s, 1H), 4.28 (s, 2H), 3.81 (s, 3H), 3.73 (s, 3H).

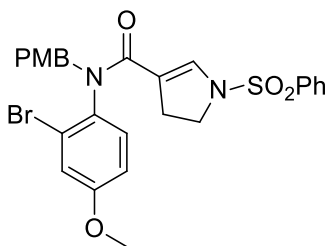

**N-(2-Bromo-4-methoxyphenyl)-N-(4-methoxybenzyl)-1-(phenylsulfonyl)-4,5-dihydro-1H-pyrrole-3-carboxamide (23):** Ghosez reagent (75 μL, 0.57 mmol) was added to a suspension of carboxylic acid **21** (144 mg, 0.57 mmol) in toluene (5.7 mL), the mixture was stirred for 1 h. NaHMDS (0.38 mL, 1M in THF) was added to a solution of protected aniline **S5** (140 mg, 0.38 mmol) at –78 °C. The mixture was stirred 30 minutes, then cannulated into the stirring acid

chloride solution, the mixture was stirred to r.t. for 3 h. The reaction was quenched with  $\text{KHCO}_3$ , and the aqueous layer was extracted with EtOAc. The combined organic layer was washed with brine, dried over  $\text{MgSO}_4$ , volatile compounds were removed under vacuum. Flash chromatography (20% EtOAc in hexanes) gave the title compound (158 mg, 69%).  $^1\text{H}$  NMR (500 MHz,  $\text{CDCl}_3$ )  $\delta$  7.61 (tt,  $J = 7.0$  Hz, 1.8 Hz, 1H) 7.54–7.48 (m, 4H) 7.19 (d,  $J = 3.0$  Hz, 1H), 7.10 (d,  $J = 8.5$  Hz, 2H), 6.77 (d,  $J = 8.5$  Hz, 2H), 6.74 (dd,  $J = 9.0$  Hz, 3.0 Hz, 1H), 6.66 (d,  $J = 9.0$  Hz, 1H), 6.02 (s, 1H), 5.47 (d,  $J = 14.0$  Hz, 1H), 4.02 (d,  $J = 14.0$  Hz, 1H), 3.84 (s, 3H), 3.78 (s, 3H), 3.38 (ddd,  $J = 50.0$  Hz, 10.0 Hz, 7.5 Hz, 2H), 2.67–2.48 (m, 2H);  $^{13}\text{C}$  NMR (125 MHz,  $\text{CDCl}_3$ )  $\delta$  164.7, 159.8, 159.0, 136.7, 135.9, 133.6, 133.3, 132.0, 130.8, 129.2, 129.0, 127.3, 124.6, 119.0, 118.2, 113.8, 113.7, 55.9, 55.2, 47.3, 30.7; HRMS (ESI)  $m/z$  calcd for  $\text{C}_{26}\text{H}_{25}\text{BrNaN}_2\text{O}_5\text{S}$   $[\text{M}+\text{Na}]^+$  579.0565, found 579.0604.

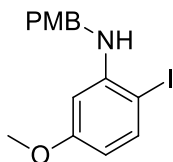

**2-Iodo-5-methoxy-N-(4-methoxybenzyl)aniline (S6):**  $\text{NaBH}(\text{OAc})_3$  (5.10 g, 24.1 mmol) was added to a solution of *p*-anisaldehyde (0.41 mL, 6.63 mmol), 2-iodo-5-methoxyaniline<sup>5</sup> (1.5 g, 6.02 mmol) and AcOH (0.11 mL, 0.11 mmol) in 1,2-DCE (30 mL). The mixture was stirred 24 h, then saturated aq.  $\text{KHCO}_3$  (15 mL) was slowly added while stirring vigorously. The aqueous layer was extracted with EtOAc, the combined organic layer was washed with brine, dried over  $\text{MgSO}_4$ , and volatile compounds were removed under vacuum. The residue was subjected to flash chromatography (20% EtOAc in hexanes) to give the title compound (1.80 g, 81%).  $^1\text{H}$  NMR (400 MHz,  $\text{CDCl}_3$ )  $\delta$  7.50 (d,  $J = 8.6$  Hz, 1H), 7.26 (d,  $J = 8.6$  Hz, 2H), 6.87 (d,  $J = 8.6$  Hz, 2H), 6.14 (d,  $J = 2.8$  Hz, 1H), 6.07 (dd,  $J = 8.6$  Hz, 2.8 Hz, 1H), 4.49 (s, 1H), 4.27 (s, 1H), 4.26



(s, 1H), 3.78 (s, 3H), 3.69 (s, 3H);  $^{13}\text{C}$  NMR (100 MHz,  $\text{CDCl}_3$ )  $\delta$  161.2, 158.8, 147.9, 138.9, 130.3, 128.5, 114.0, 104.0, 97.9, 74.5, 55.2, 47.8.

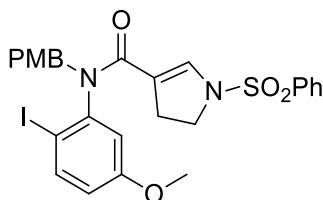

***N*-(2-Iodo-5-methoxyphenyl)-*N*-(4-methoxybenzyl)-1-(phenylsulfonyl)-4,5-dihydro-1*H*-pyrrole-3-carboxamide (24):** Ghosez reagent (0.12 mL, 0.93 mmol) was added to a suspension of carboxylic acid **21** (236 mg, 0.93 mmol) in toluene (7 mL), the mixture was stirred for 1 h. NaHMDS (0.72 mL, 1M in THF) was added to a solution of aniline **S6** (265 mg, 0.72 mmol) in THF (7 mL) at  $-78$  °C. The mixture was stirred 30 minutes, then added by cannula into the stirring acid chloride solution, the mixture was warmed to room temperature and stirred for 3 h. The reaction was quenched with  $\text{KHCO}_3$ , and the aqueous layer was extracted with EtOAc. The combined organic layer was washed with brine and dried over  $\text{MgSO}_4$ ; volatiles were removed under vacuum. The residue was purified by flash chromatography (20% EtOAc in hexanes) to give the title compound (235 mg, 54%) as a colorless oil:  $^1\text{H}$  NMR (500 MHz,  $\text{CDCl}_3$ )  $\delta$  7.79 (d,  $J = 9.0$  Hz, 1H), 7.61 (tt,  $J = 6.5$  Hz, 2.0 Hz, 1H), 7.53–7.50 (m, 3H), 7.13 (d,  $J = 8.5$  Hz, 2H), 6.78 (d,  $J = 8.5$  Hz, 2H), 6.74 (dd,  $J = 9.0$  Hz, 3.0 Hz, 1H), 6.29 (d,  $J = 3.0$  Hz, 1H), 5.92 (s, 1H), 5.52 (d,  $J = 14.5$  Hz, 1H), 3.98 (d,  $J = 14.5$  Hz, 1H), 3.77 (s, 3H), 3.61 (s, 3H), 3.42 (td,  $J = 10.0$  Hz, 7.5 Hz, 1H), 3.34 (td,  $J = 10.0$  Hz, 7.5 Hz, 1H), 2.72–2.58 (m, 2H);  $^{13}\text{C}$  NMR (125 MHz,  $\text{CDCl}_3$ )  $\delta$  163.9, 160.5, 159.1, 144.9, 140.2, 136.9, 135.3, 133.3, 130.9, 129.3, 128.9, 127.3, 118.1, 117.0, 116.6, 113.7, 89.0, 55.6, 55.2, 52.0, 57.1, 30.9; HRMS (ESI)  $m/z$  calcd for  $\text{C}_{26}\text{H}_{26}\text{IN}_2\text{O}_5\text{S}$   $[\text{M}+\text{H}]^+$  605.0607, found 605.0616.

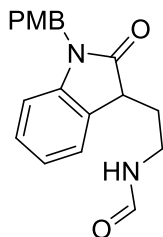

***N*-(2-(1-(4-Methoxybenzyl)-2-oxoindolin-3-yl)ethyl)formamide (25):** A solution of  $\text{Bu}_3\text{SnH}$  (0.24 mL, 0.83 mmol) and AIBN (14 mg, 0.014 mmol) in degassed benzene (4 mL) were added via syringe pump to a refluxing solution of iodoaniline **22** (98 mg, 0.17 mmol) in degassed benzene (8 mL) to afford the title compound (34 mg, 65%) as a colorless solid: mp  $>220$  °C.  $^1\text{H}$  NMR (400 MHz,  $\text{CDCl}_3$ )  $\delta$  8.14 (s, 1H), 7.28 (d,  $J = 7.6$  Hz, 1H), 7.23 (d,  $J = 7.2$  Hz, 2H), 7.20 (t,  $J = 7.6$  Hz, 1H), 7.05 (t,  $J = 7.6$  Hz, 1H), 6.84 (d,  $J = 7.6$  Hz, 2H), 6.78 (d,  $J = 7.6$  Hz, 1H), 6.52 (s, 1H), 4.84 (s, 2H), 3.77 (s, 3H), 3.59–3.54 (m, 3H), 2.32 (dq,  $J = 14.0$  Hz, 6.0 Hz, 1H), 2.03 (hex,  $J = 7.2$  Hz, 1H);  $^{13}\text{C}$  NMR (100 MHz,  $\text{CDCl}_3$ )  $\delta$  178.0, 161.3, 159.1, 143.0, 128.7, 128.6, 128.4, 128.2, 127.7, 123.9, 122.9, 114.2, 109.2, 55.3, 44.1, 43.3, 36.0, 30.1; HRMS (TOF ES)  $m/z$  calcd for  $\text{C}_{19}\text{H}_{21}\text{N}_2\text{O}_3$   $[\text{M}+\text{H}]^+$  325.1552, found 325.1562.

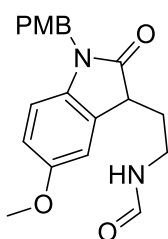

***N*-(2-(5-Methoxy-1-(4-methoxybenzyl)-2-oxoindolin-3-yl)ethyl)formamide (26):** A solution of  $\text{Bu}_3\text{SnH}$  (0.24 mL, 0.83 mmol) and AIBN (14 mg, 0.014 mmol) in degassed benzene (4 mL) were added via syringe pump to a refluxing solution of bromoaniline **23** (100 mg, 0.17 mmol) in degassed benzene (8 mL). After 2 h, the mixture was cooled to r.t. and the volatile compounds were removed under vacuum. Flash chromatography (0–5 % MeOH in  $\text{CH}_2\text{Cl}_2$ ) gives the title

compound (25 mg, 42%) as a white solid, mp >220 °C. <sup>1</sup>H NMR (500 MHz, CDCl<sub>3</sub>) δ 8.15 (s, 1H), 7.21 (dt, *J* = 10.0 Hz, 2.5 Hz, 2H), 6.91 (dd, *J* = 2.5 Hz, 0.9 Hz, 1H), 6.84 (dt, *J* = 10.0 Hz, 2.5 Hz, 2H), 6.71 (dd, *J* = 8.0 Hz, 2.5 Hz, 1H), 6.66 (d, *J* = 8.5 Hz, 1H), 4.82 (s, 2H), 3.77 (s, 3H), 3.76 (s, 3H), 3.58–3.53 (m, 2H), 2.31 (dq, *J* = 15.0 Hz, 6.0 Hz, 1H), 2.06–1.98 (m, 1H); <sup>13</sup>C NMR (125 MHz, CDCl<sub>3</sub>) δ 177.6, 161.3, 159.1, 156.2, 136.4, 129.7, 128.6, 127.7, 114.2, 112.6, 111.2, 109.6, 55.7, 55.2, 44.4, 43.3, 35.9, 30.1; HRMS (ESI) *m/z* calcd for C<sub>20</sub>H<sub>21</sub>N<sub>2</sub>O<sub>3</sub> [M+H]<sup>+</sup> 337.1552, found 337.1558.

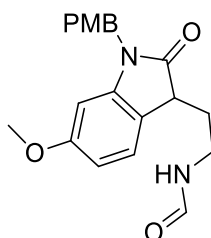

***N*-(2-(6-Methoxy-1-(4-methoxybenzyl)-2-oxoindolin-3-yl)ethyl)formamide (27):** A solution of Bu<sub>3</sub>SnH (0.06 mL, 0.40 mmol) and AIBN (3 mg, 0.003 mmol) in degassed benzene (1 mL) were added via syringe pump to a refluxing solution of iodoanilide **24** (20 mg, 0.03 mmol) in degassed benzene (1.5 mL). After heating an additional 2 h, the mixture was cooled to room temperature and volatile compounds were removed under vacuum. The residue was purified by flash chromatography (5% MeOH in CH<sub>2</sub>Cl<sub>2</sub>) to give the title compound (6 mg, 54%) as a white solid: mp >220 °C. <sup>1</sup>H NMR (500 MHz, CDCl<sub>3</sub>) δ 8.13 (s, 1H), 7.22 (dt, *J* = 10.0 Hz, 2.5 Hz, 2H), 7.17 (d, *J* = 8.5 Hz, 1H), 6.84 (dt, *J* = 10.0 Hz, 2.5 Hz, 2H), 6.54 (dd, *J* = 8.0 Hz, 2.5 Hz, 1H), 6.37 (d, *J* = 2.5 Hz, 1H), 4.81 (s, 2H), 3.77 (s, 3H), 3.75 (s, 3H), 3.56–3.49 (m, 2H), 2.26 (dq, *J* = 14.5 Hz, 6.0 Hz, 1H), 2.04–1.97 (m, 1H); <sup>13</sup>C NMR (125 MHz, CDCl<sub>3</sub>) δ 178.7, 161.3, 160.1, 159.2, 144.2, 128.7, 127.7, 124.4, 120.2, 114.3, 106.4, 97.6, 55.5, 55.3, 43.5, 43.3, 36.0, 30.3; HRMS (ESI) *m/z* calcd for C<sub>20</sub>H<sub>21</sub>N<sub>2</sub>O<sub>3</sub> [M+H]<sup>+</sup> 337.1552, found 337.1558.

## References

1. Zi, W.; Wu, H.; Toste, D. F. *J. Am. Chem. Soc.* **2015**, *137*, 3225-3228.
2. Zhang, H.; Hay, E. B.; Geib, S. J.; Curran, D. P. *J. Am. Chem. Soc.* **2013**, *135*, 16610-16617.
3. Stevens, C. V.; Van Meenen, E.; Eeckhout, Y.; Vanderhoydonck, B.; Hooghe, W., *Chem. Commun.* **2005**, *38*, 4827-4829.
4. Kondo, Y.; Kojima, S.; Sakamoto, T. *J. Org. Chem.* **1997**, *62*, 6507-6511.
5. Roschangar, F.; Liu, J.; Estanove, E.; Dufour, M.; Rodríguez, S.; Farina, V.; Hickey, E.; Hossain, A.; Jones, P. J.; Lee, H.; Lu, B. Z.; Varsolona, R.; Schröder, J.; Beaulieu, P.; Gillard, J.; Senanayake, C. H. *Tetrahedron Lett.* **2008**, *49*, 363-366.

7.398  
7.390  
7.384  
7.370  
7.364  
7.361  
7.351  
7.346  
7.339  
7.333  
7.318  
7.294  
7.287  
7.270  
7.262  
7.185  
7.183  
7.181  
7.157  
7.132  
7.127  
7.106  
7.102  
6.769  
6.766  
6.744  
6.741  
6.719  
6.716  
6.692  
6.690  
6.666  
6.664  
6.661

4.651  
4.603  
4.544  
4.496  
4.445

3.764  
3.731  
3.647  
3.615  
3.492  
3.460  
3.264  
3.230

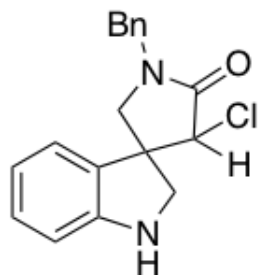

5b

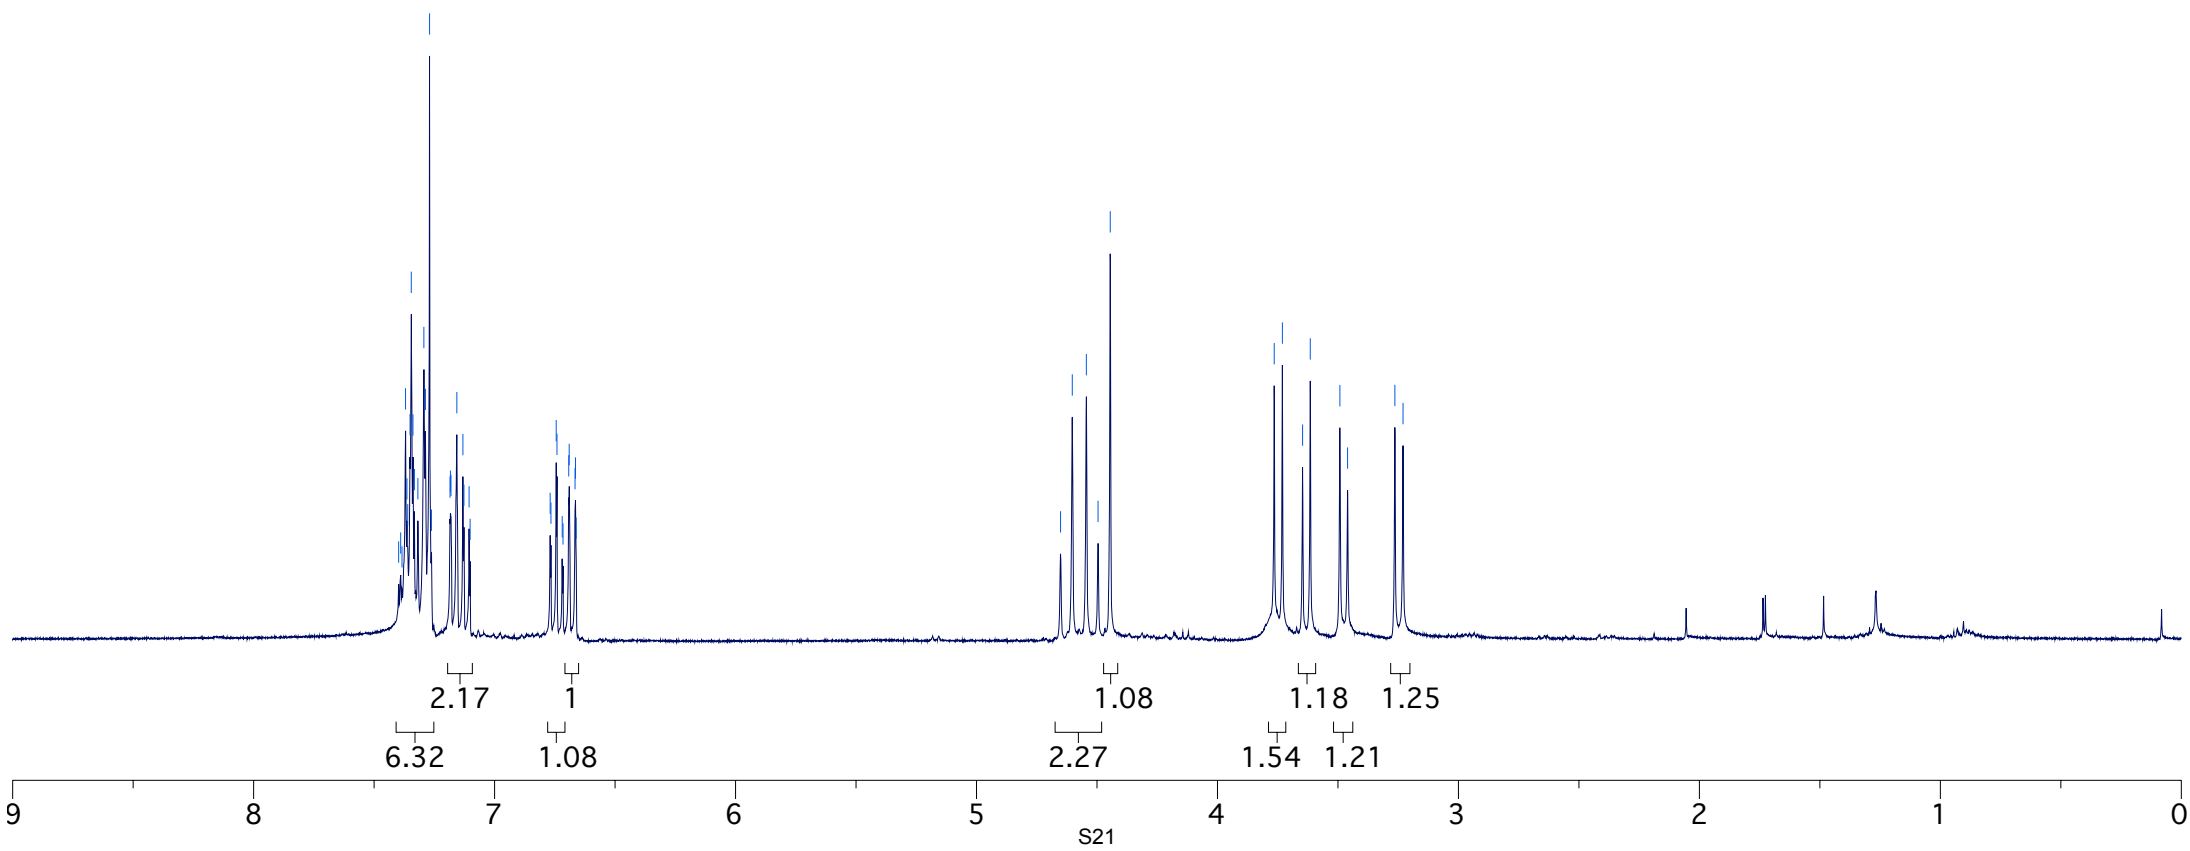

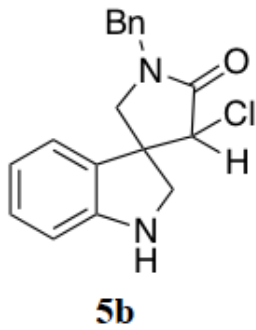

169.283

151.603

135.418

129.490

128.950

128.270

128.081

126.609

125.621

118.776

110.079

61.540

58.612

55.043

52.168

47.200

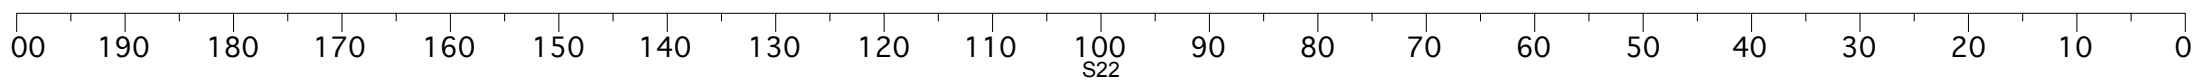

7.377  
7.371  
7.363  
7.356  
7.349  
7.343  
7.330  
7.325  
7.323  
7.314  
7.308  
7.300  
7.292  
7.279  
7.273  
7.267  
7.259  
7.253  
7.248  
7.103  
7.099  
7.077  
7.073  
7.069  
7.057  
7.052  
7.048  
7.044  
7.035  
6.775  
6.771  
6.766  
6.750  
6.747  
6.742  
6.738  
6.725  
6.722  
6.664  
6.656  
6.639  
6.631

4.643  
4.594  
4.433  
4.385

3.744  
3.527  
3.497  
3.489  
3.480  
3.472  
3.450  
3.419  
3.386  
3.373  
3.365  
3.340  
2.900  
2.893  
2.843  
2.837  
2.679  
2.672  
2.623  
2.615

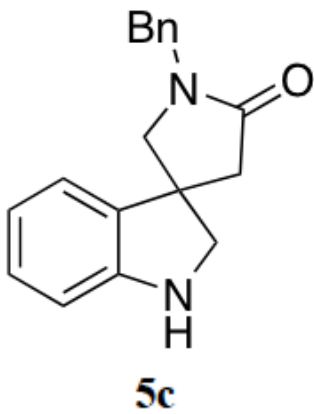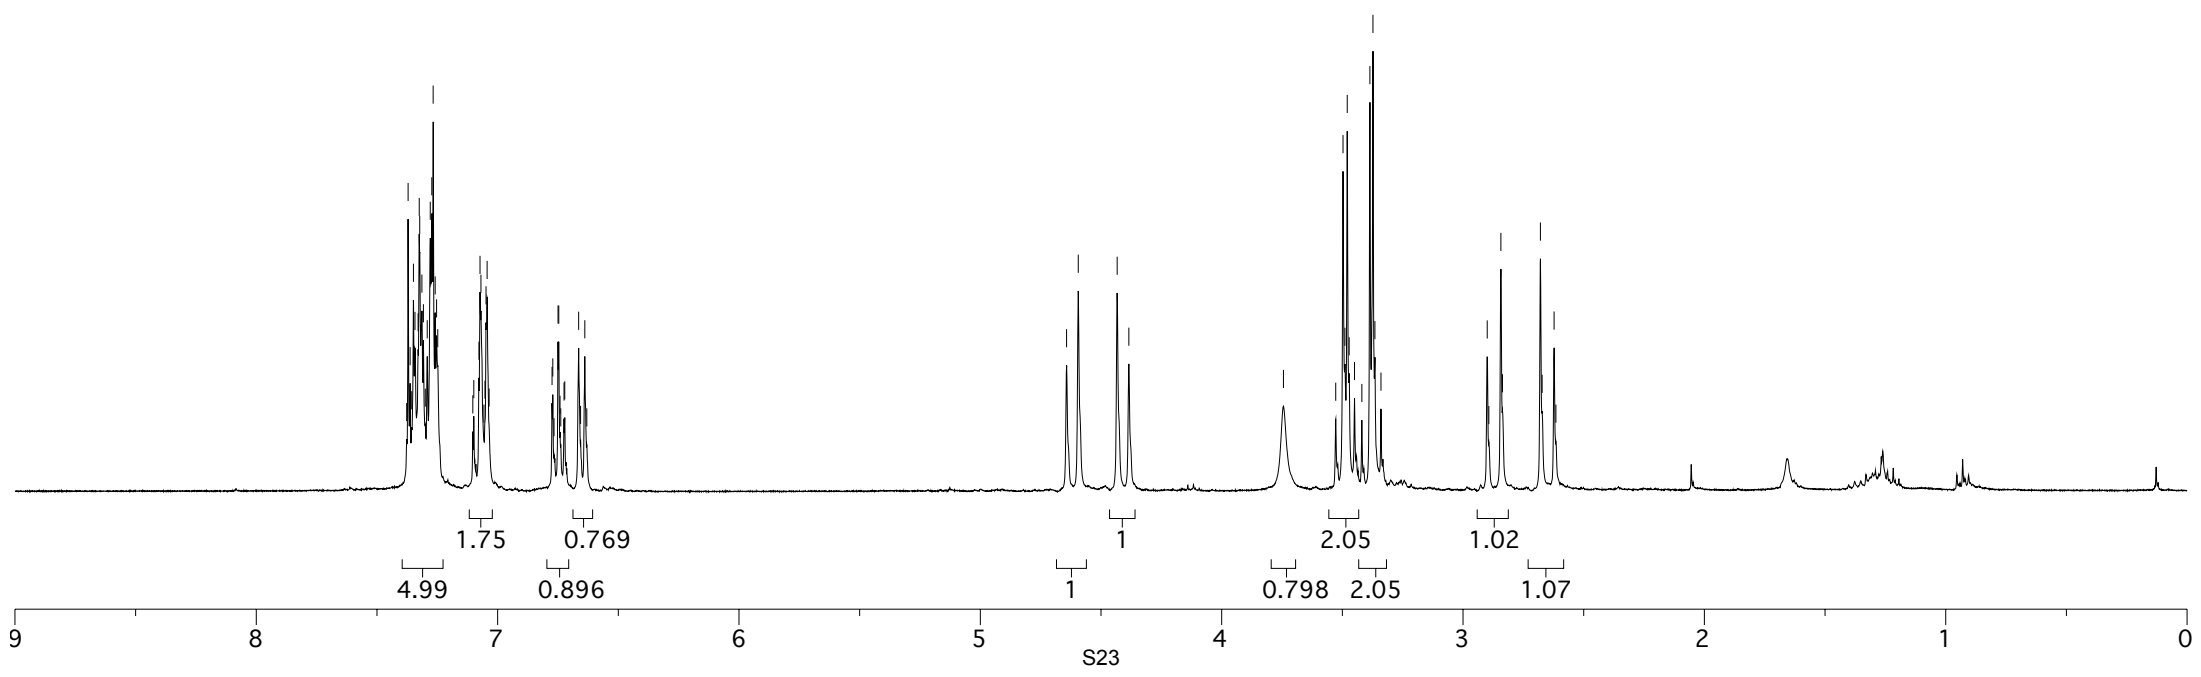

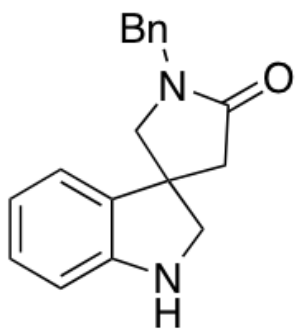

5c

173.043

150.693

136.167

132.529

128.794

128.590

128.317

127.767

122.145

119.324

109.970

60.633

58.275

46.662

45.787

43.989

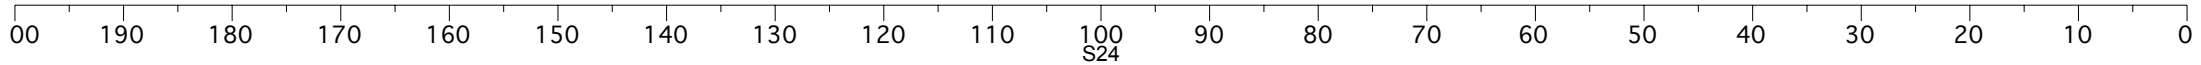

S24



8.041  
8.014  
7.734  
7.709  
7.688  
7.652  
7.626  
7.593  
7.567  
7.516  
7.388  
7.363  
7.336  
7.296  
7.271  
7.259  
7.256  
7.255  
7.246  
7.205  
7.178  
7.149  
7.145  
7.114  
6.762  
6.735  
6.595  
6.568  
6.527  
6.503  
6.477  
6.457  
6.453

4.545  
4.529  
4.473  
4.456  
4.087

2.337

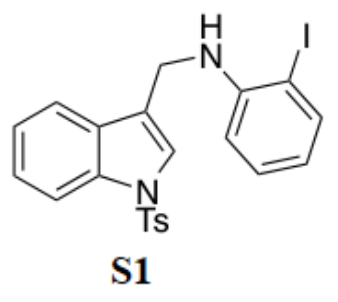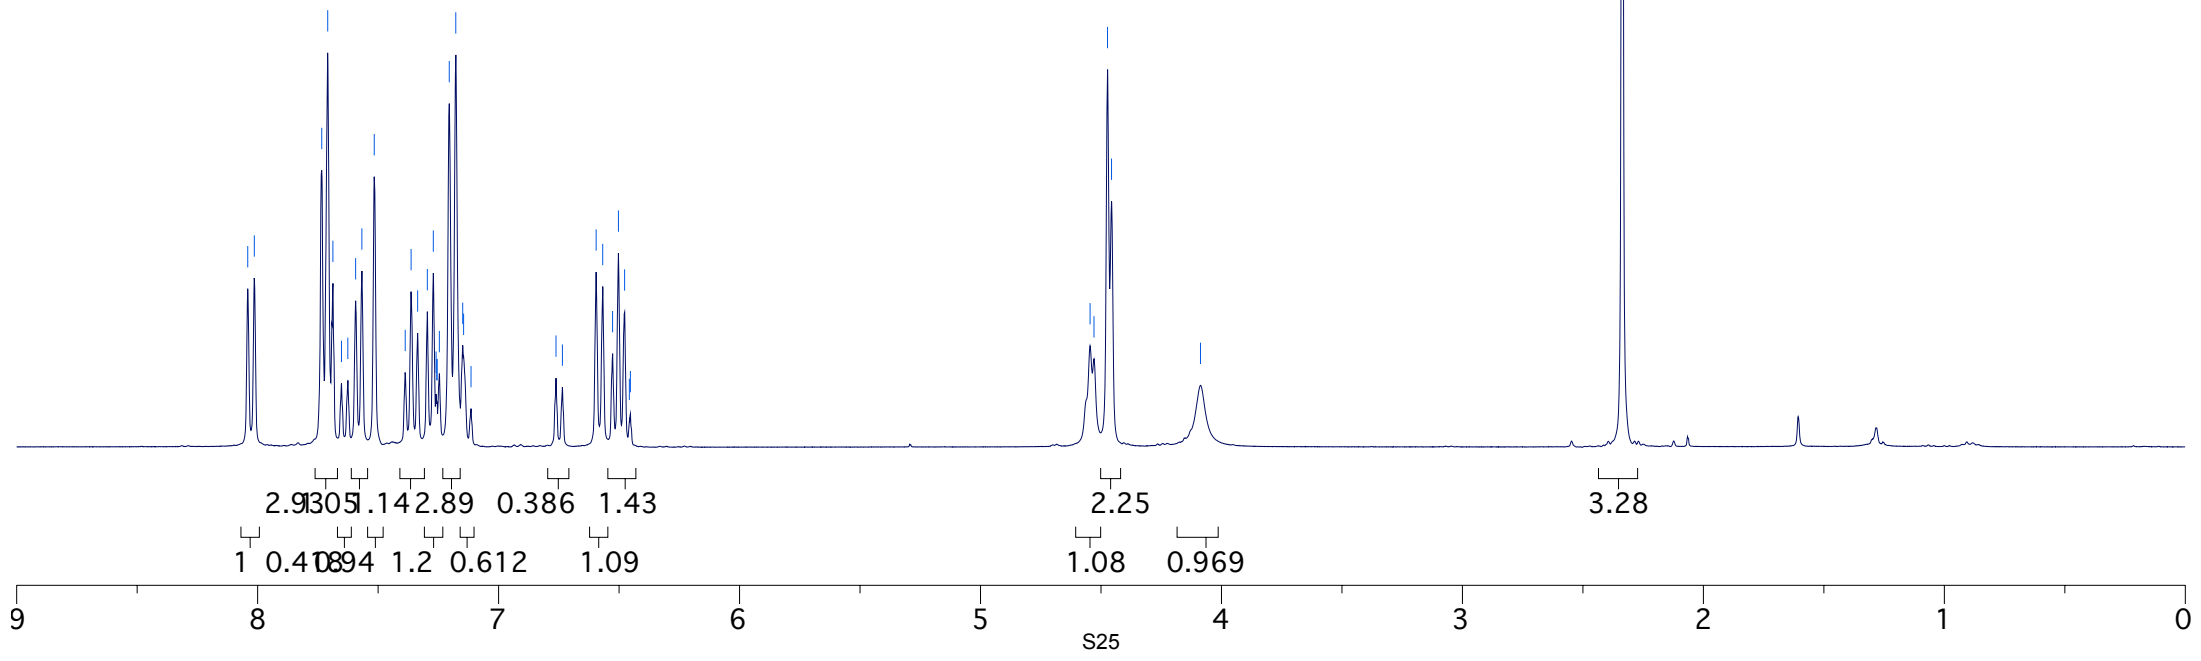

S25

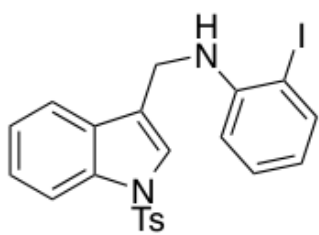

**S1**

146.873  
144.954  
139.136  
135.617  
135.124  
129.915  
129.646  
129.420  
126.847  
125.087  
124.200  
123.414  
119.951  
119.631  
119.225  
113.974  
111.077

85.627

40.245

21.622

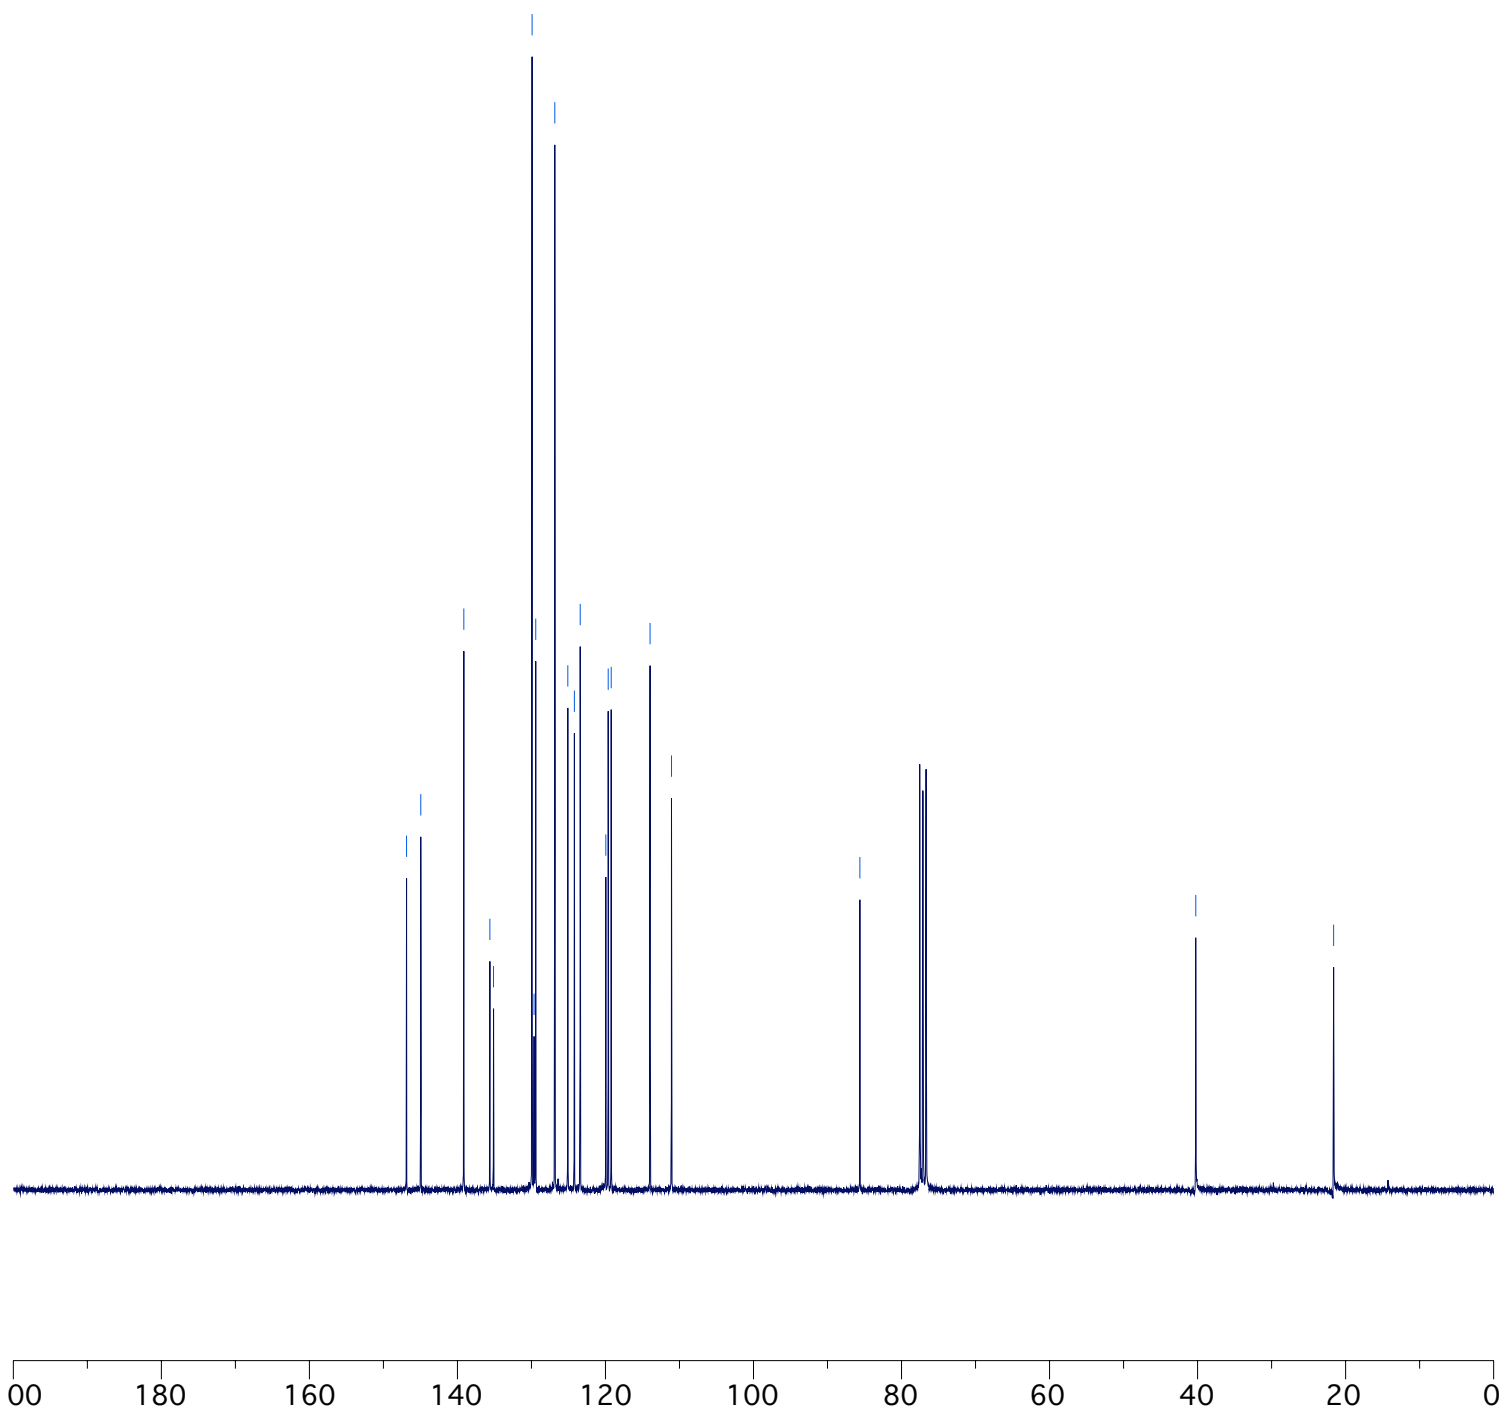

7.981  
7.955  
7.953  
7.898  
7.894  
7.872  
7.868  
7.711  
7.683  
7.599  
7.573  
7.542  
7.322  
7.319  
7.298  
7.295  
7.271  
7.268  
7.261  
7.259  
7.249  
7.247  
7.244  
7.218  
7.194  
7.168  
7.037  
7.033  
7.011  
7.006  
6.832  
6.829  
6.827  
6.808  
6.806  
6.803  
6.782  
6.777

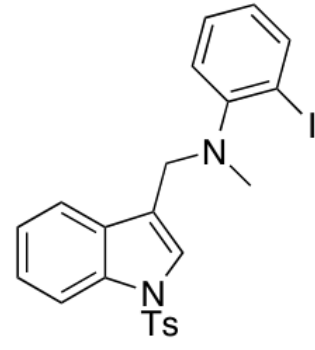

7

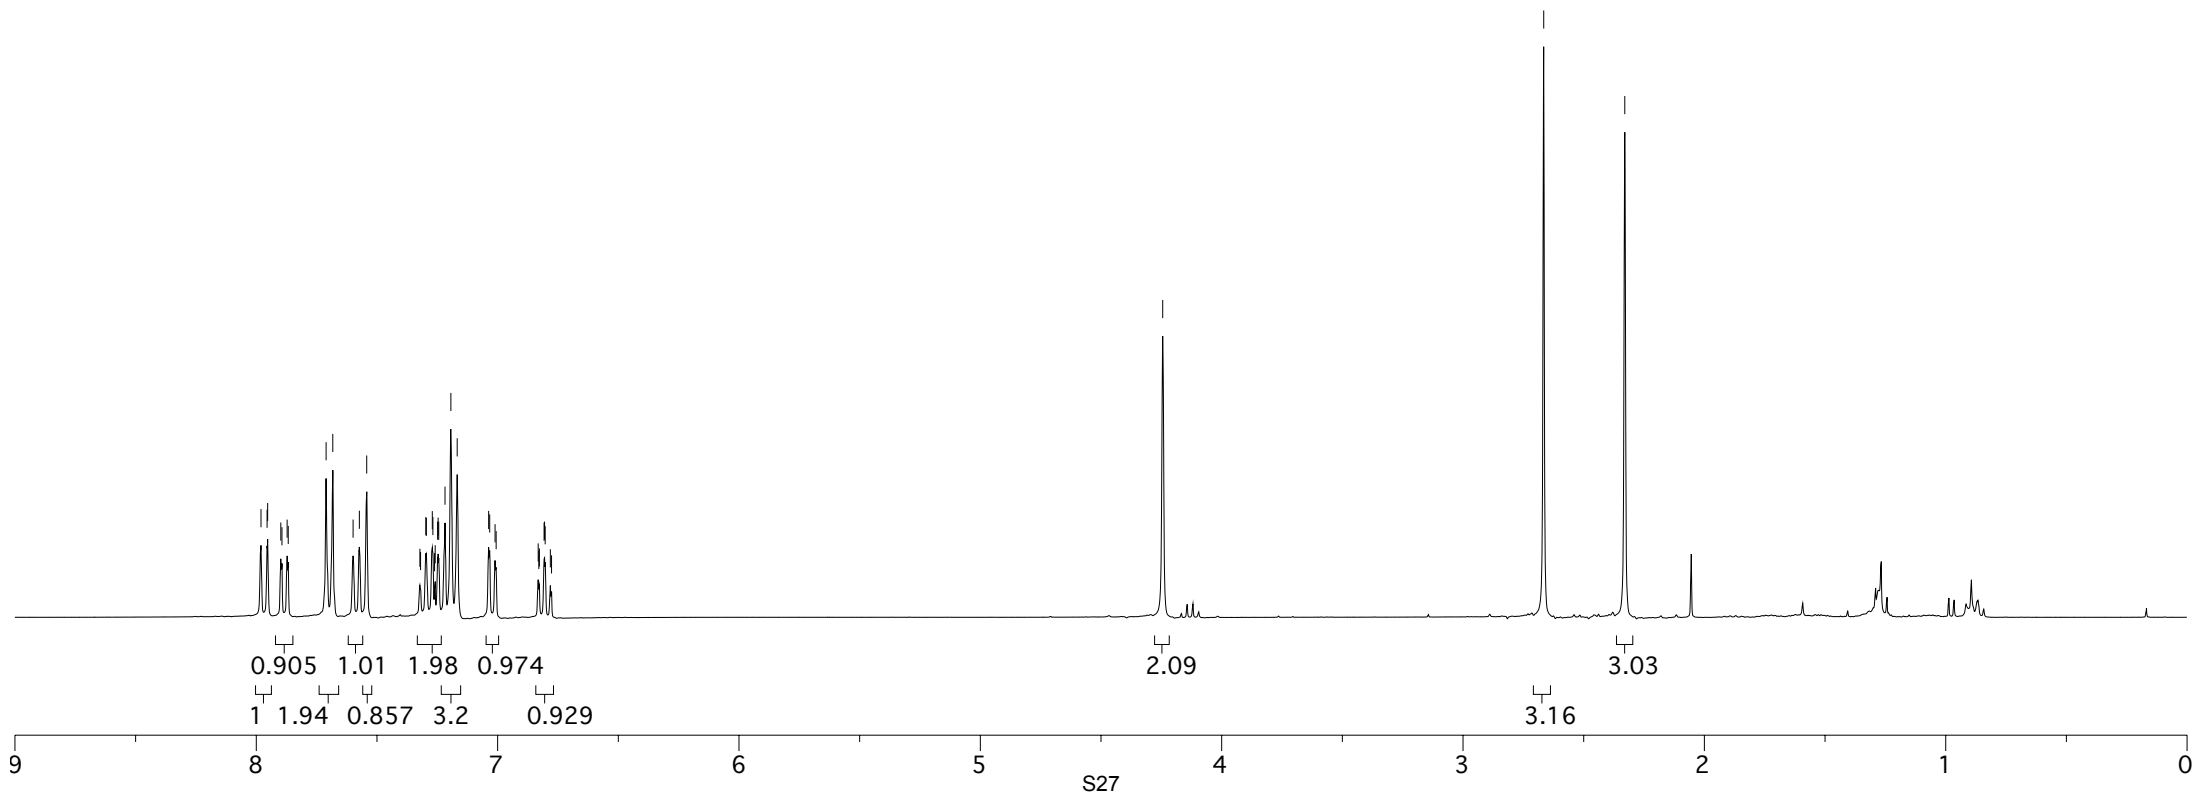

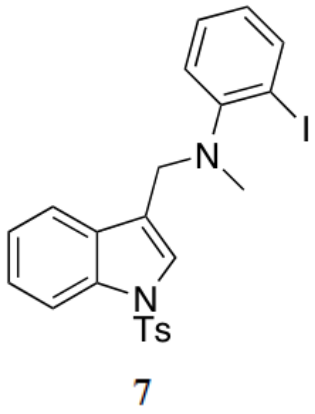

153.773  
144.843  
140.270  
135.432  
135.274  
130.570  
129.882  
129.079  
126.842  
125.747  
125.436  
124.767  
123.139  
122.221  
120.621  
119.522  
113.683

98.586

51.704

42.385

21.689

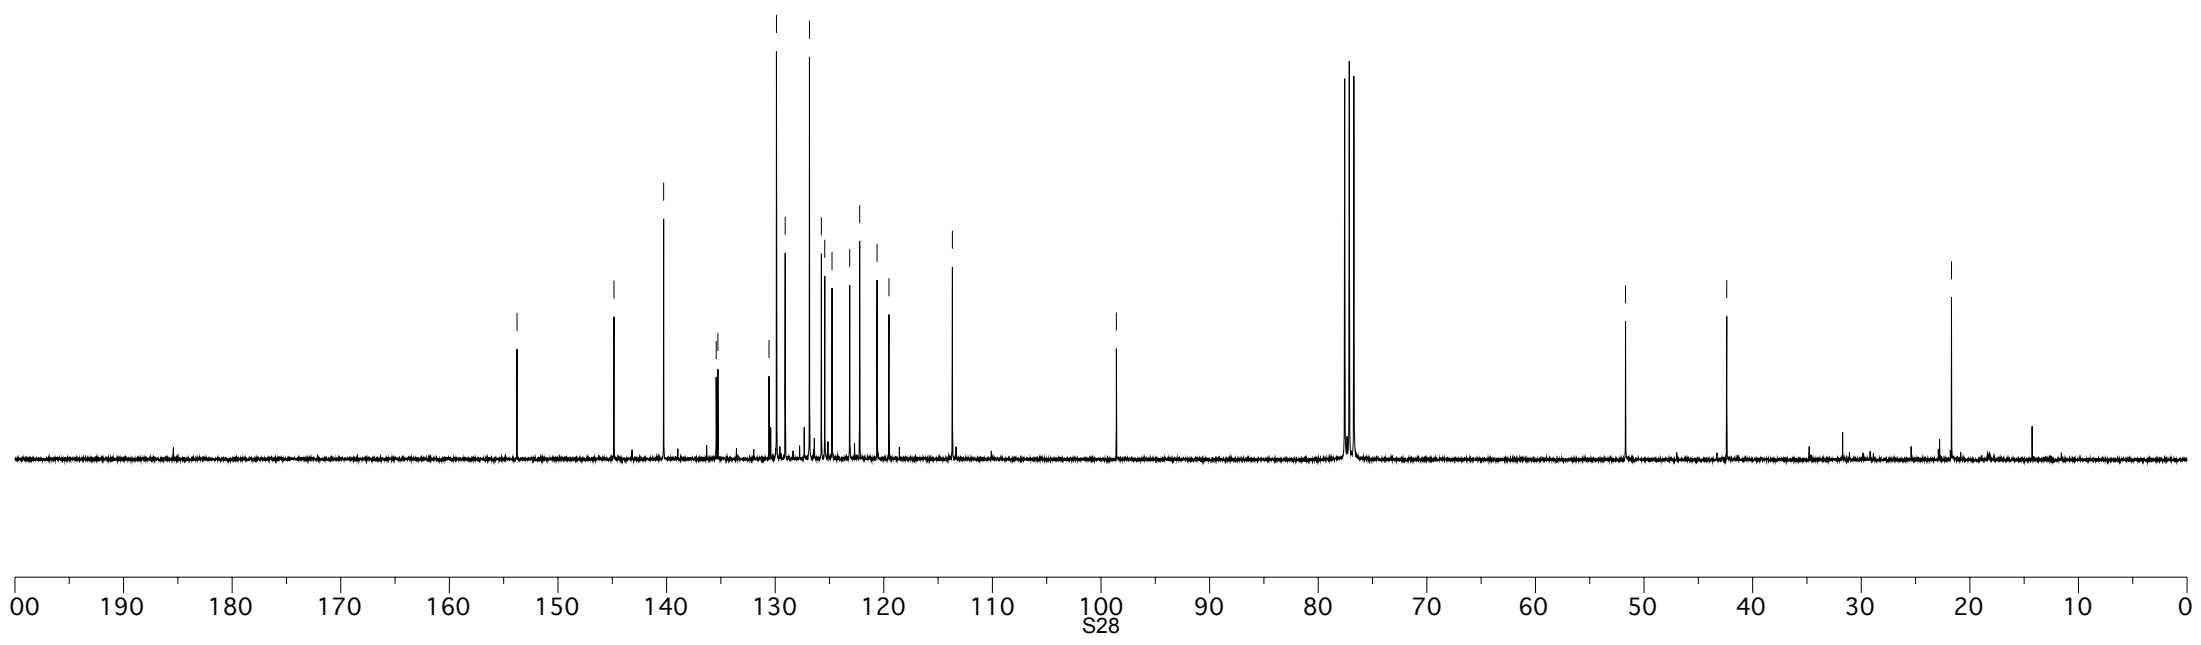

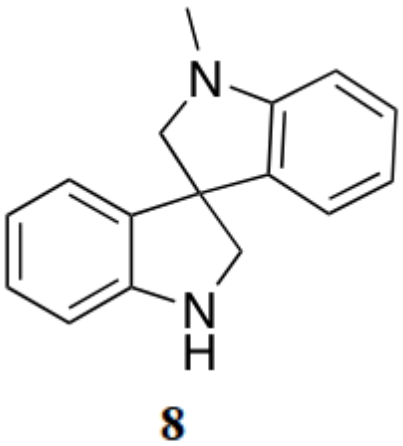

7.191  
7.179  
7.166  
7.125  
7.112  
7.099  
7.045  
7.032  
7.016  
7.004  
6.769  
6.757  
6.750  
6.744  
6.737  
6.732  
6.719  
6.609  
6.596

3.790  
3.775  
3.633  
3.618  
3.603  
3.279  
3.264  
2.818

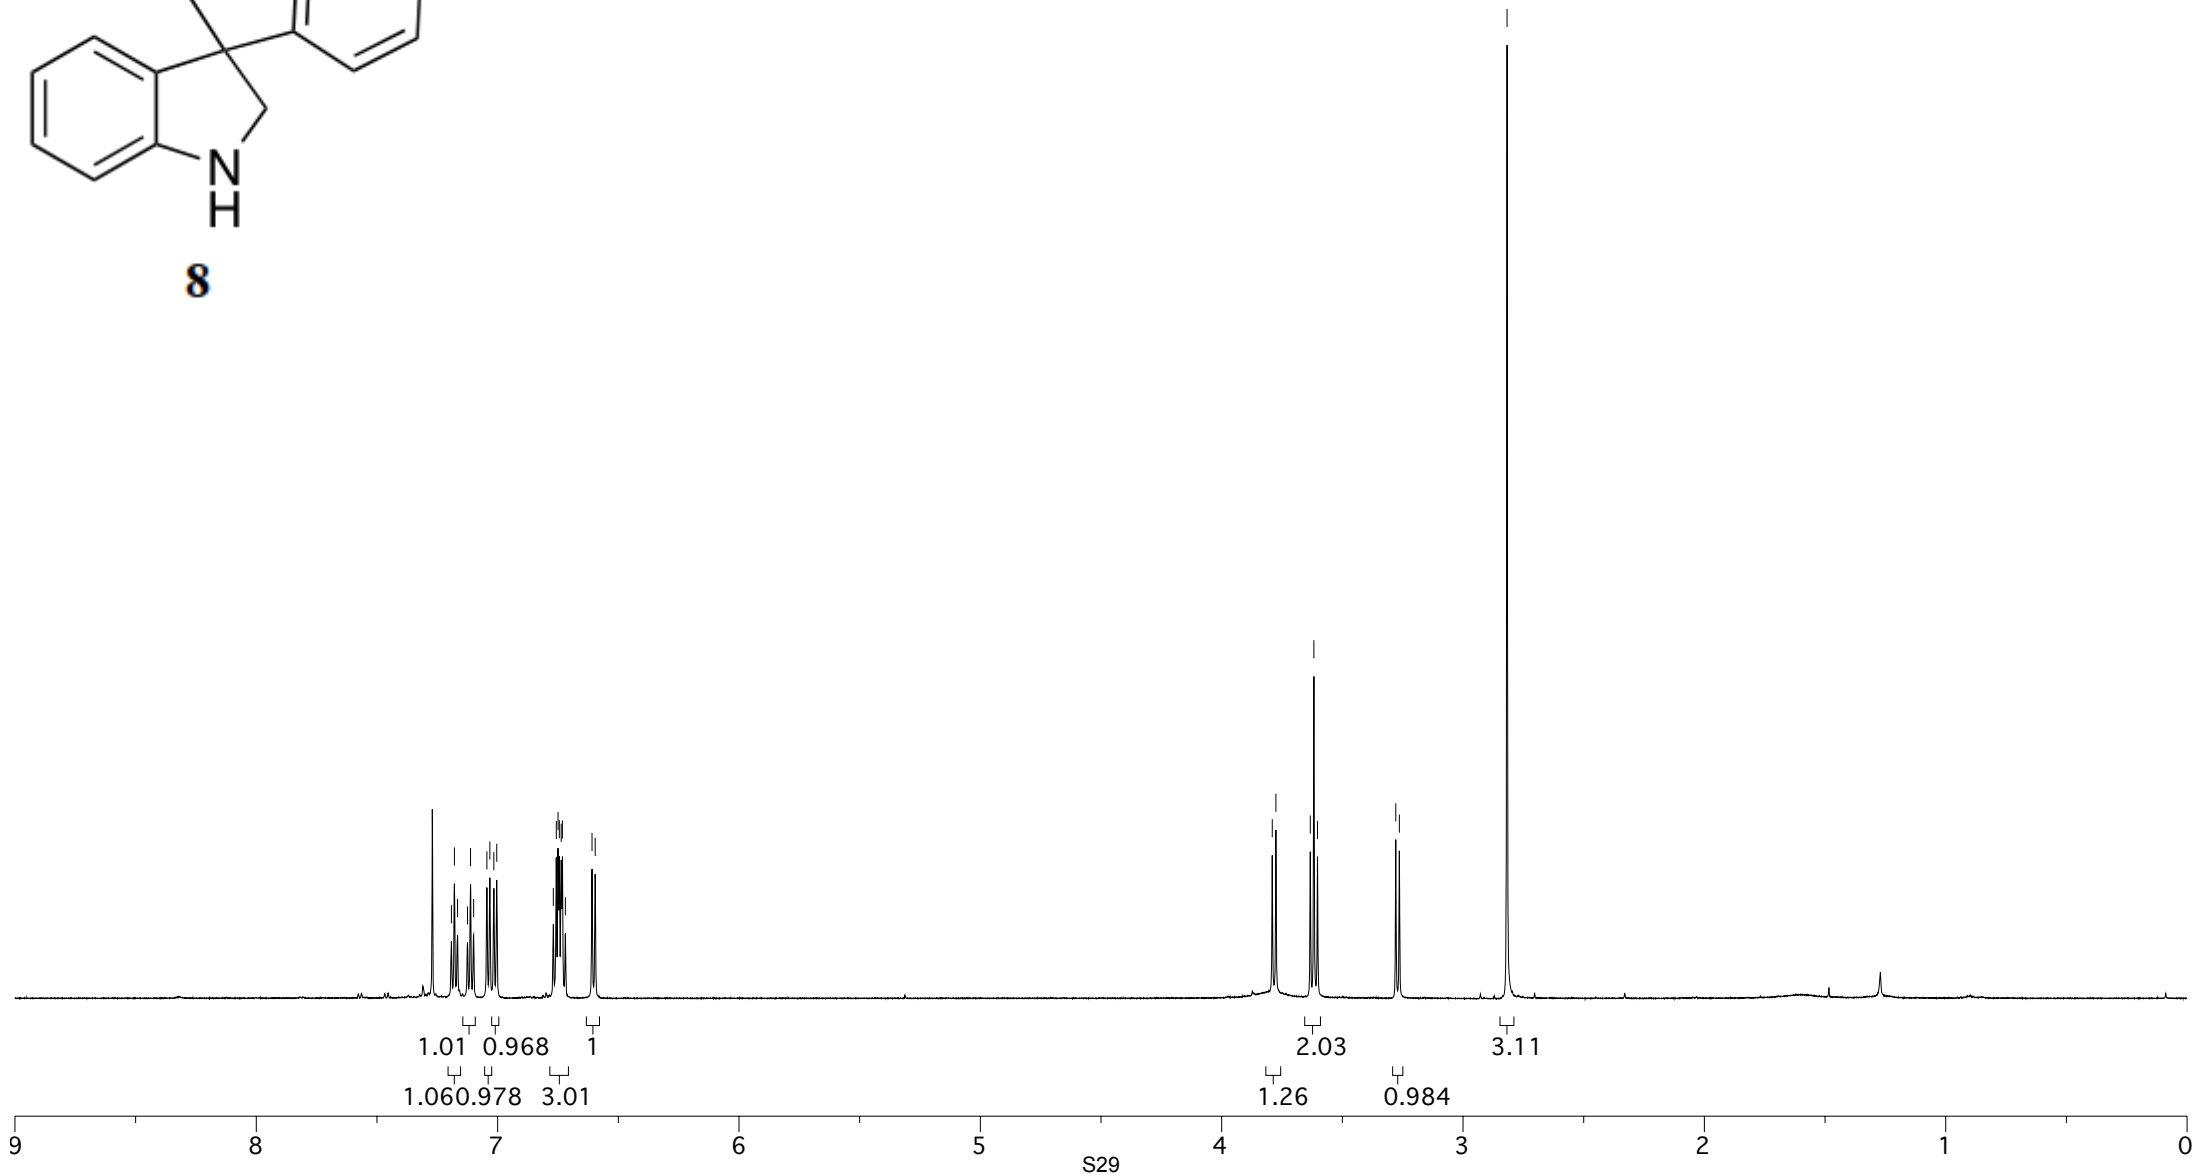

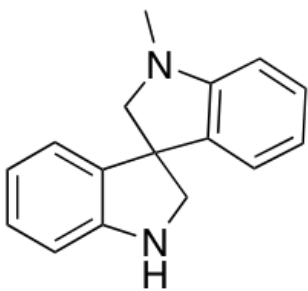

**8**

153.115  
151.414  
135.309  
134.014  
128.385  
128.240  
124.151  
123.647  
119.352  
118.558  
109.729  
107.534  
68.871  
60.350  
54.502  
36.071

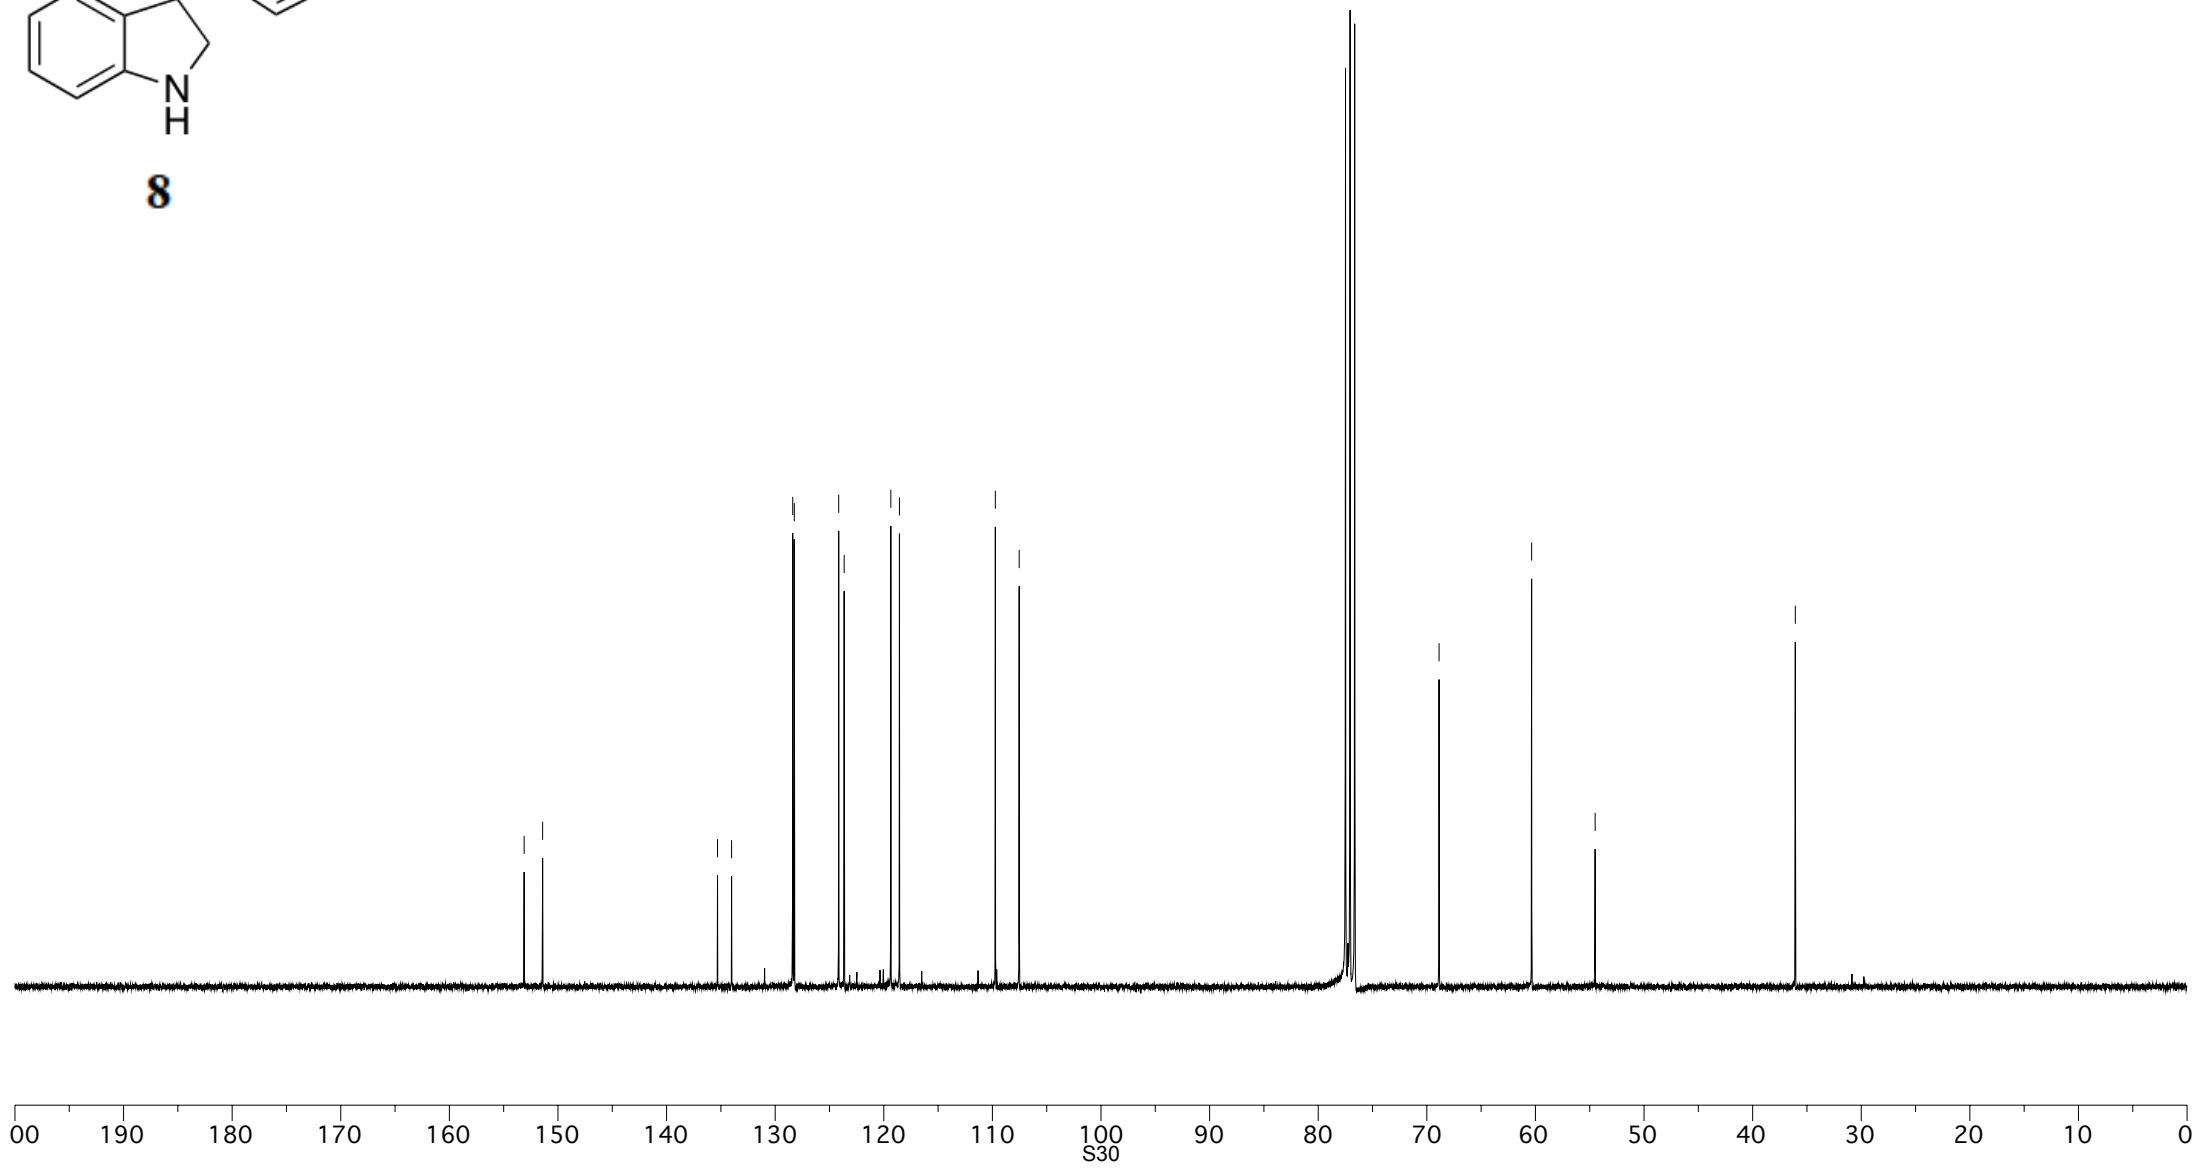

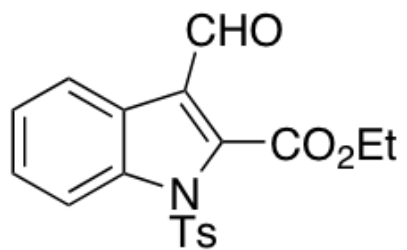

**9**

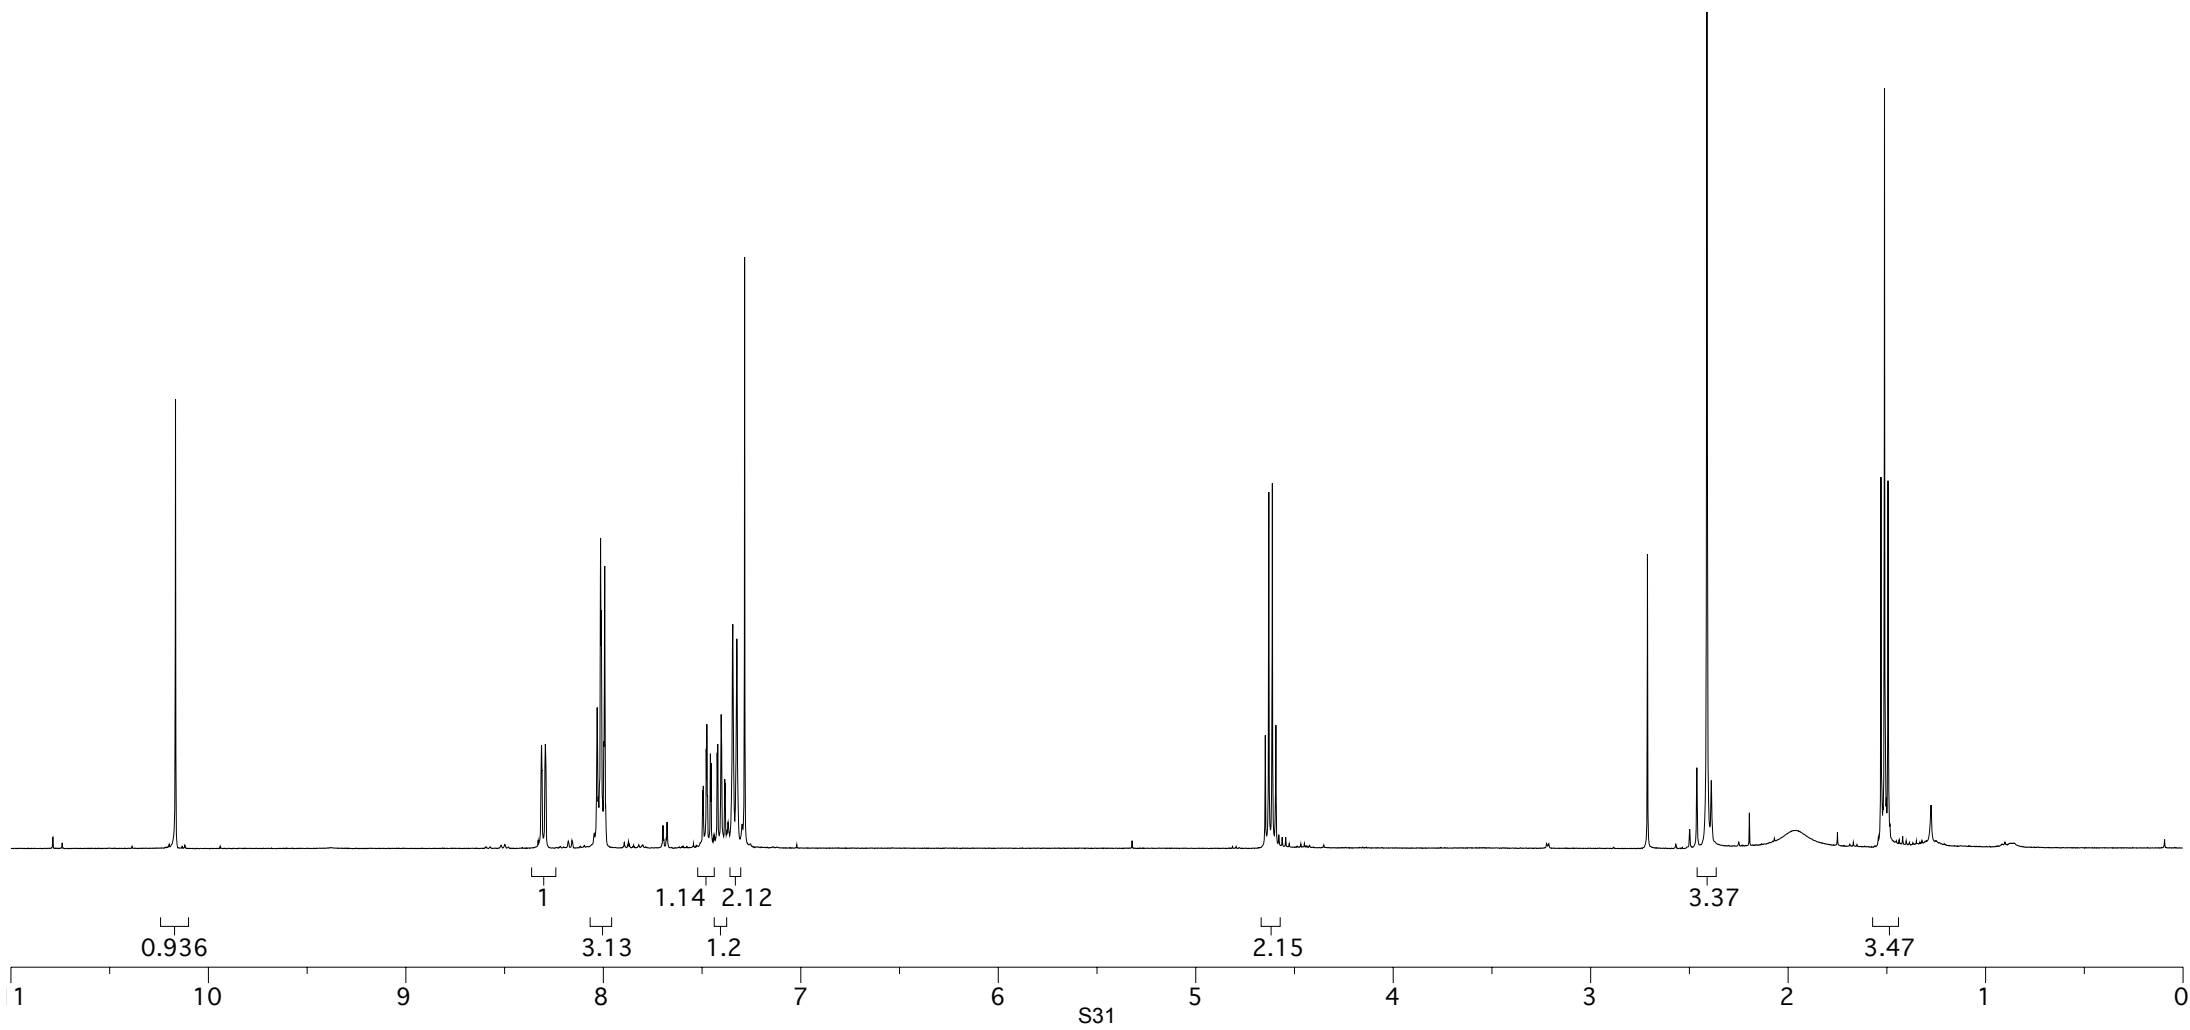

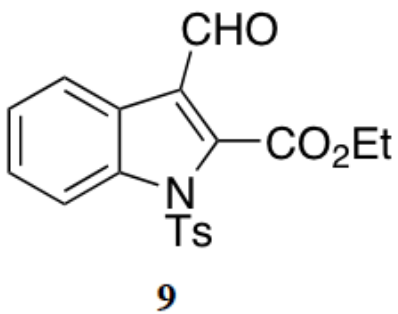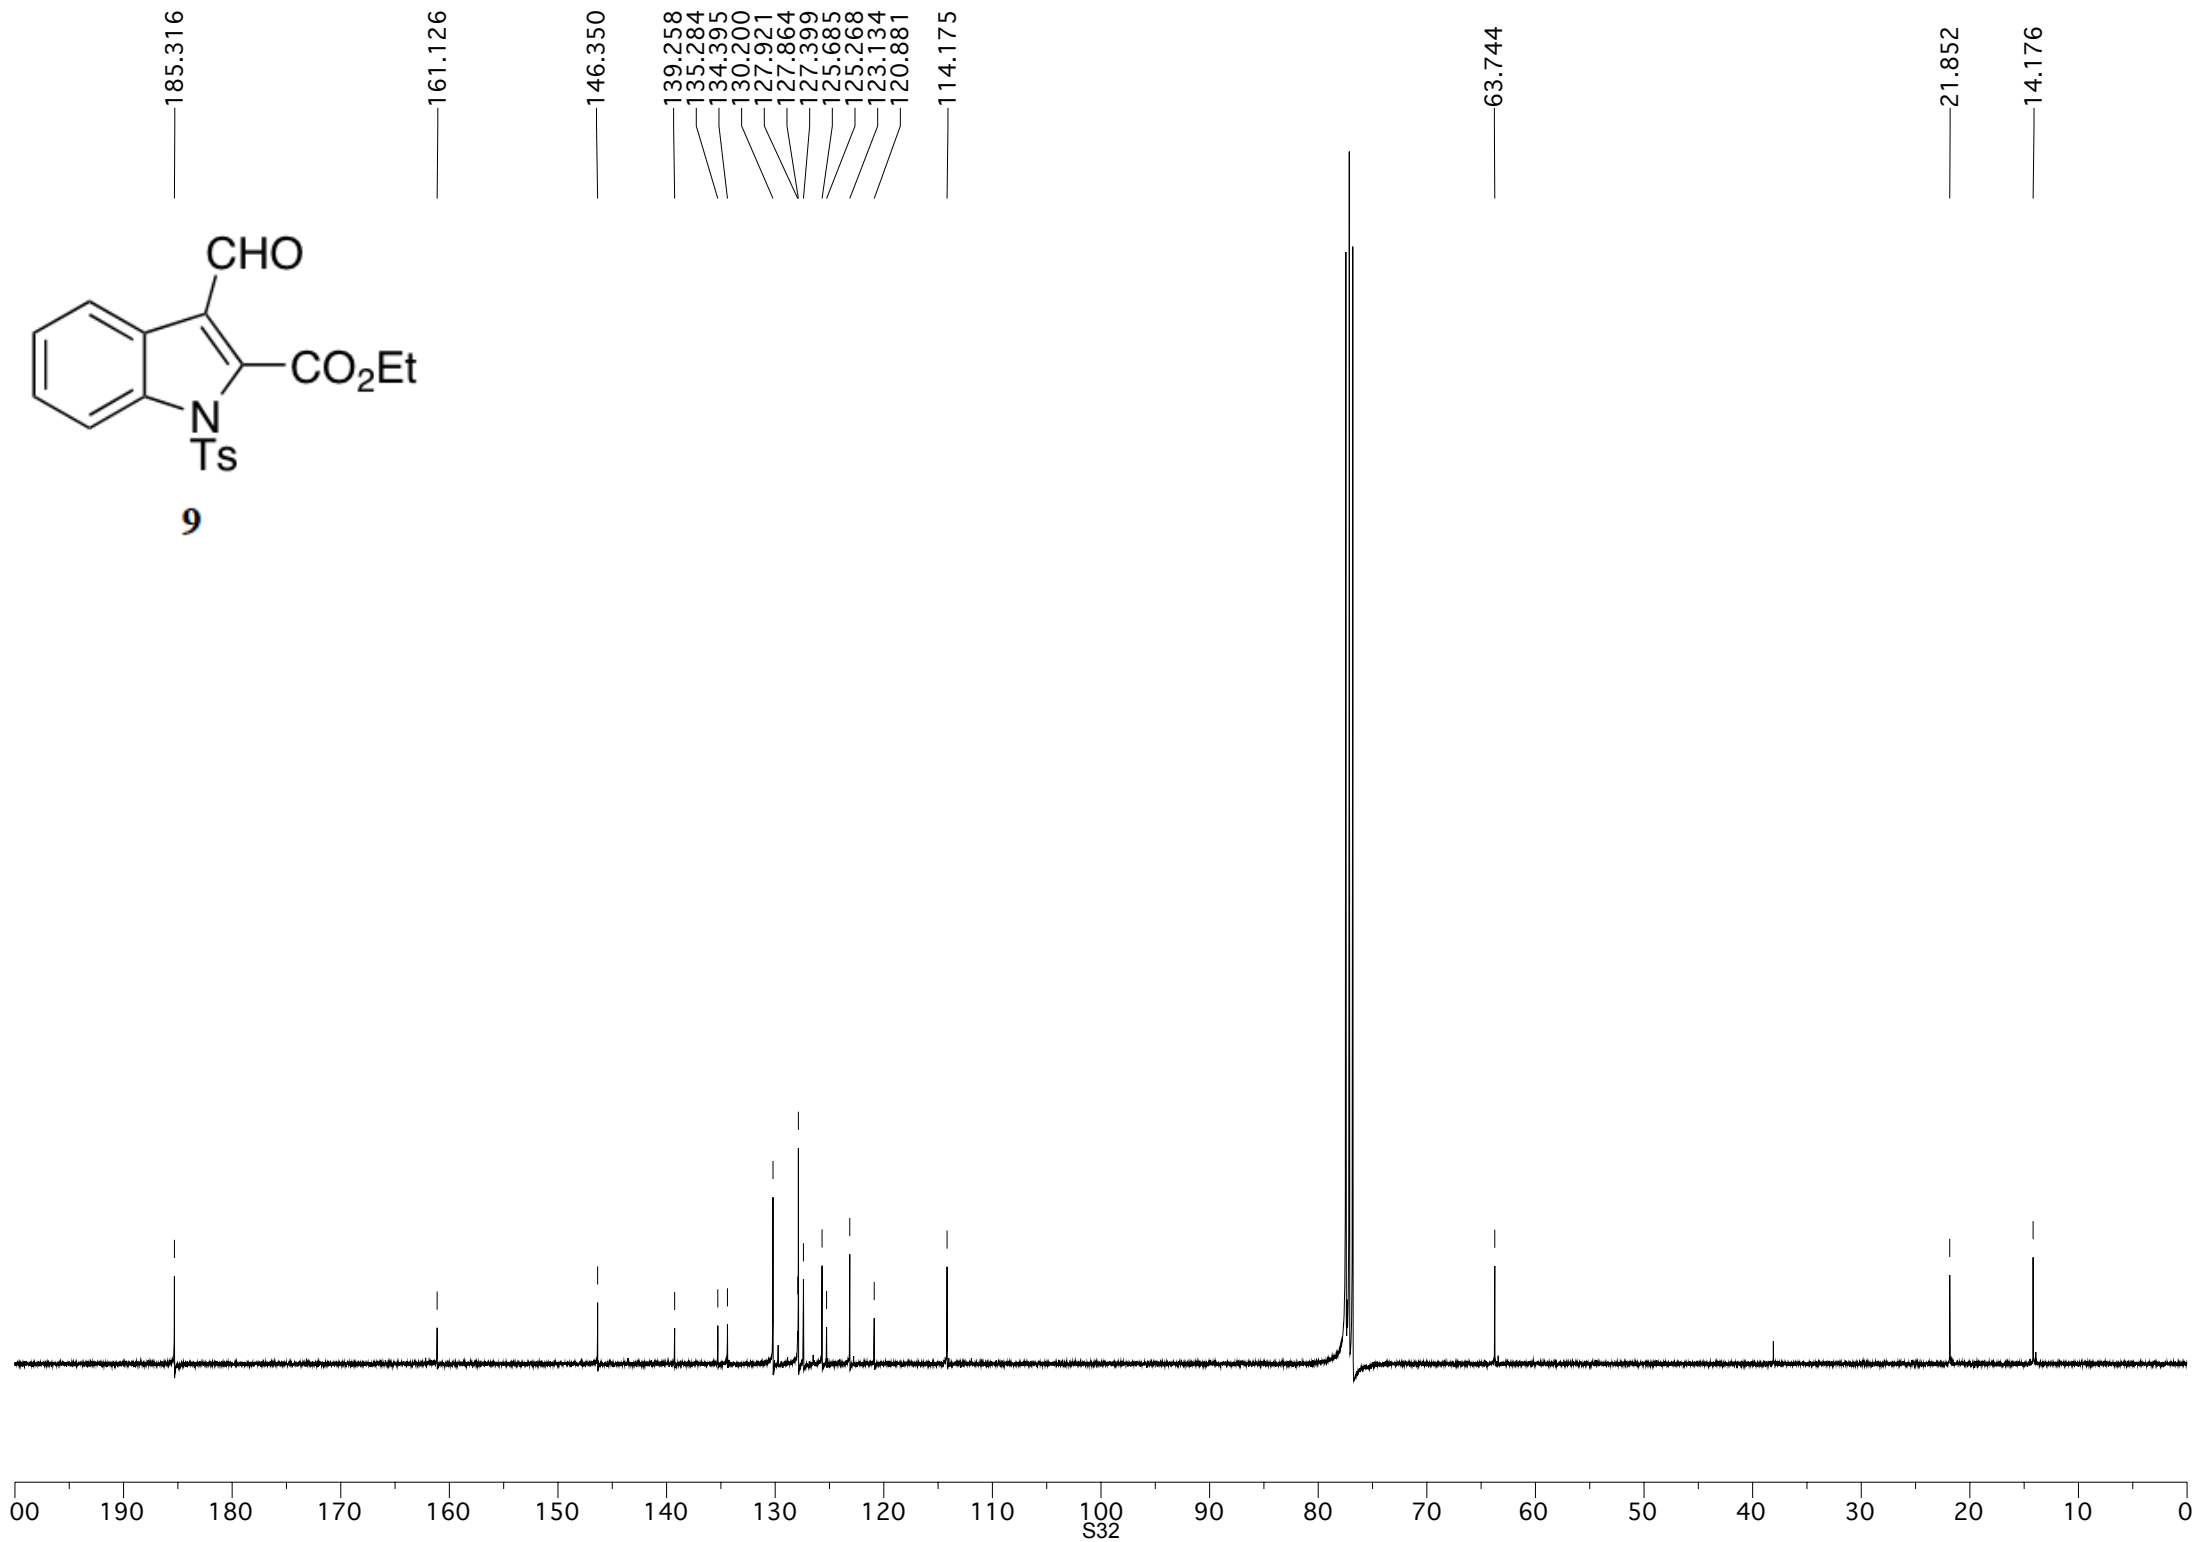



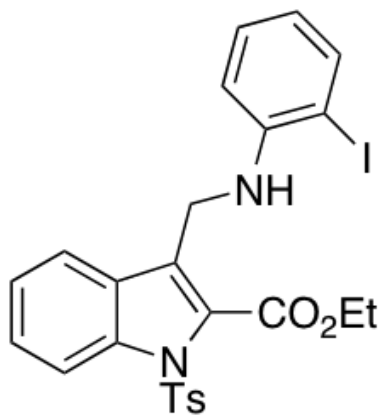

**S2**

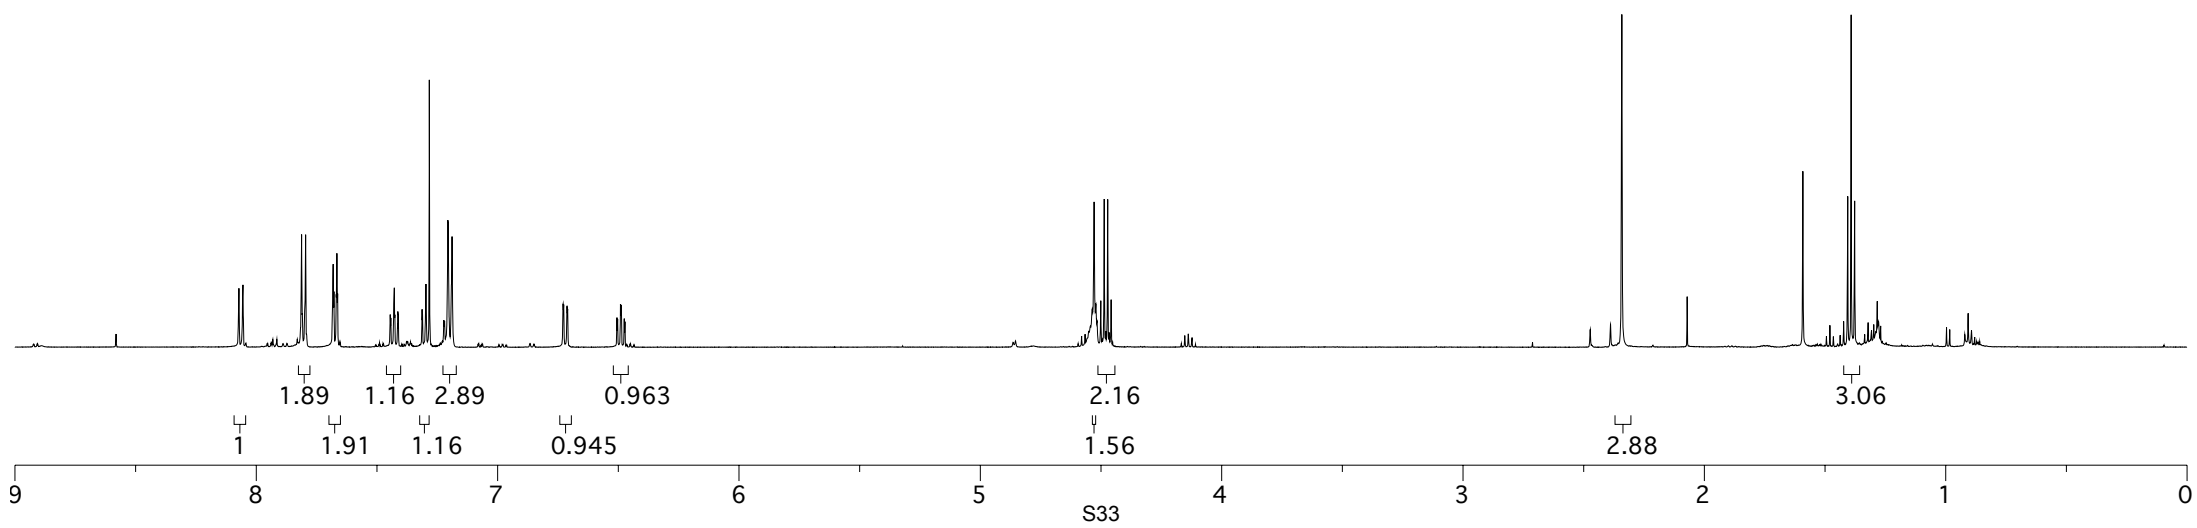

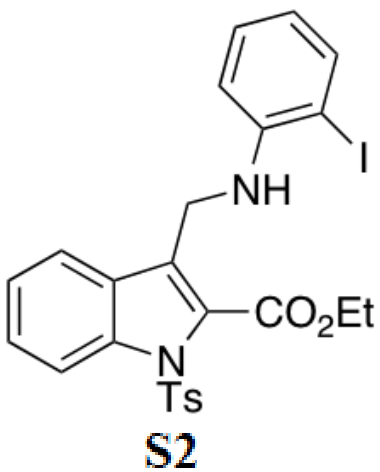

162.382  
146.802  
145.075  
139.081  
136.776  
134.404  
129.737  
129.611  
129.450  
128.859  
127.241  
126.927  
124.354  
124.272  
120.777  
119.279  
115.488  
110.948

85.477

62.640

39.045

21.646

14.042

00 190 180 170 160 150 140 130 120 110 100 90 80 70 60 50 40 30 20 10 0

S34

8.005  
7.984  
7.921  
7.918  
7.902  
7.898  
7.828  
7.808  
7.716  
7.712  
7.695  
7.691  
7.429  
7.426  
7.411  
7.408  
7.405  
7.390  
7.387  
7.304  
7.302  
7.284  
7.270  
7.267  
7.264  
7.196  
7.176  
7.119  
7.115  
7.100  
7.097  
7.081  
7.078  
7.046  
7.042  
7.027  
7.022  
7.008  
7.003  
6.412  
6.408  
6.393  
6.389  
5.762  
5.725  
4.537  
4.500  
4.153  
4.144  
4.137  
4.135  
4.126  
4.119  
4.108  
4.091  
4.073  
4.055  
4.046  
4.038  
4.029

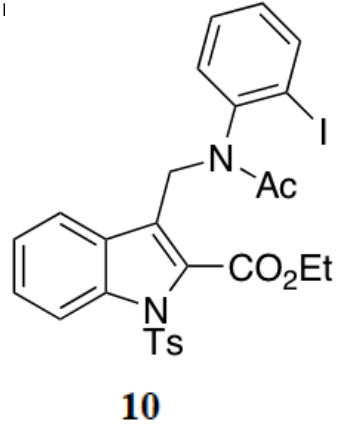

2.353  
2.053  
1.779  
1.284  
1.266  
1.260  
1.248  
1.242  
1.224

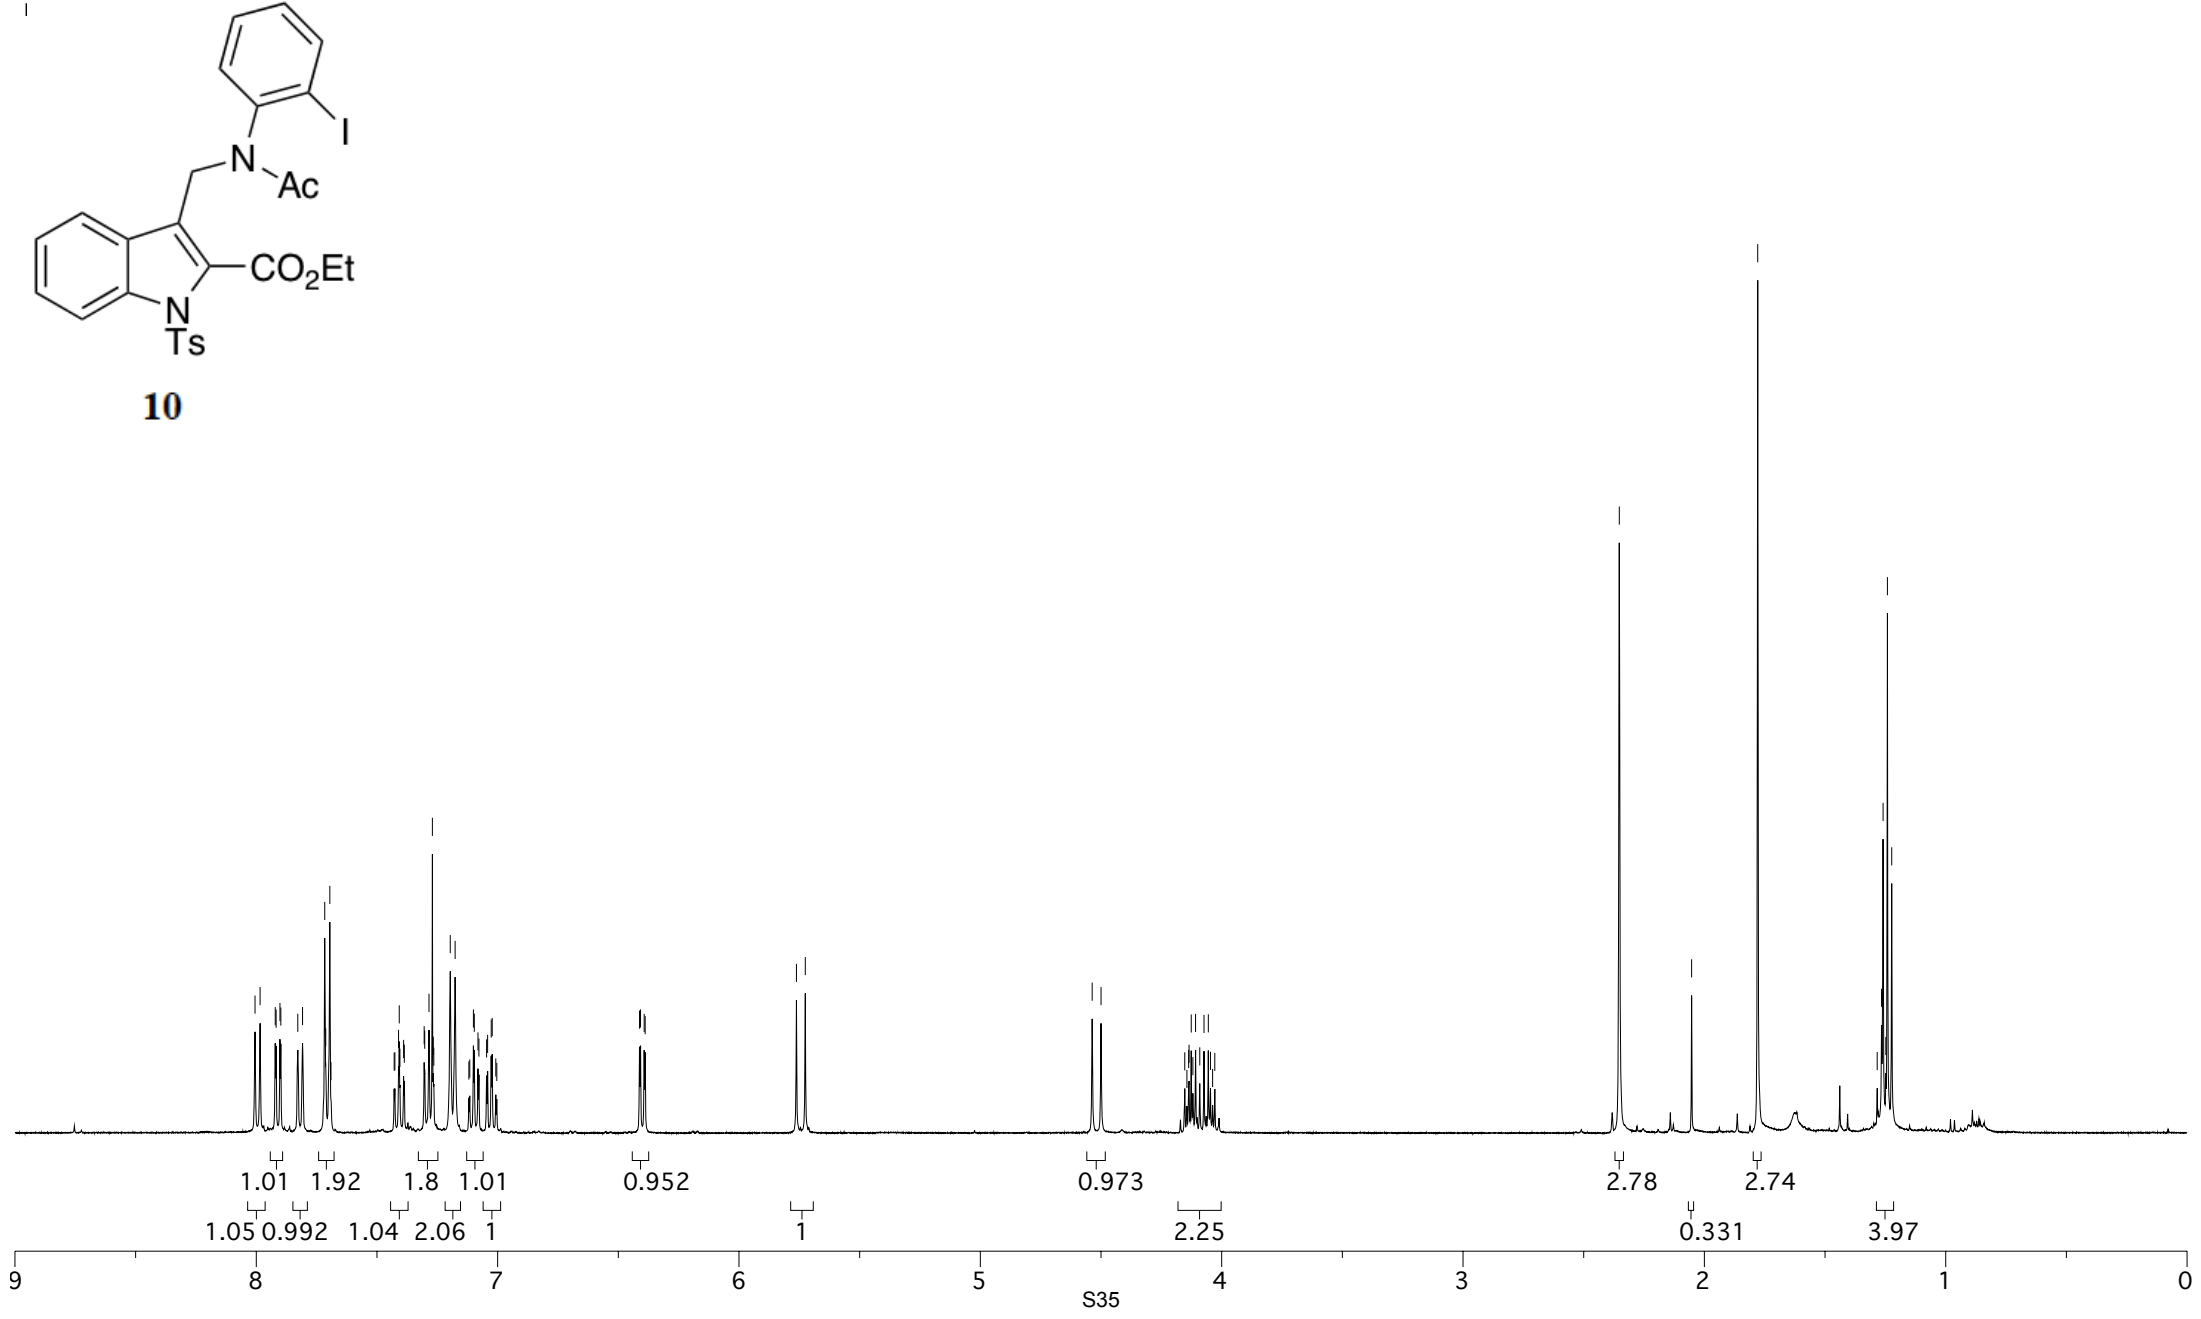

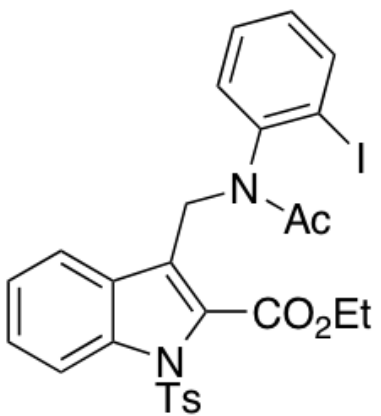

10

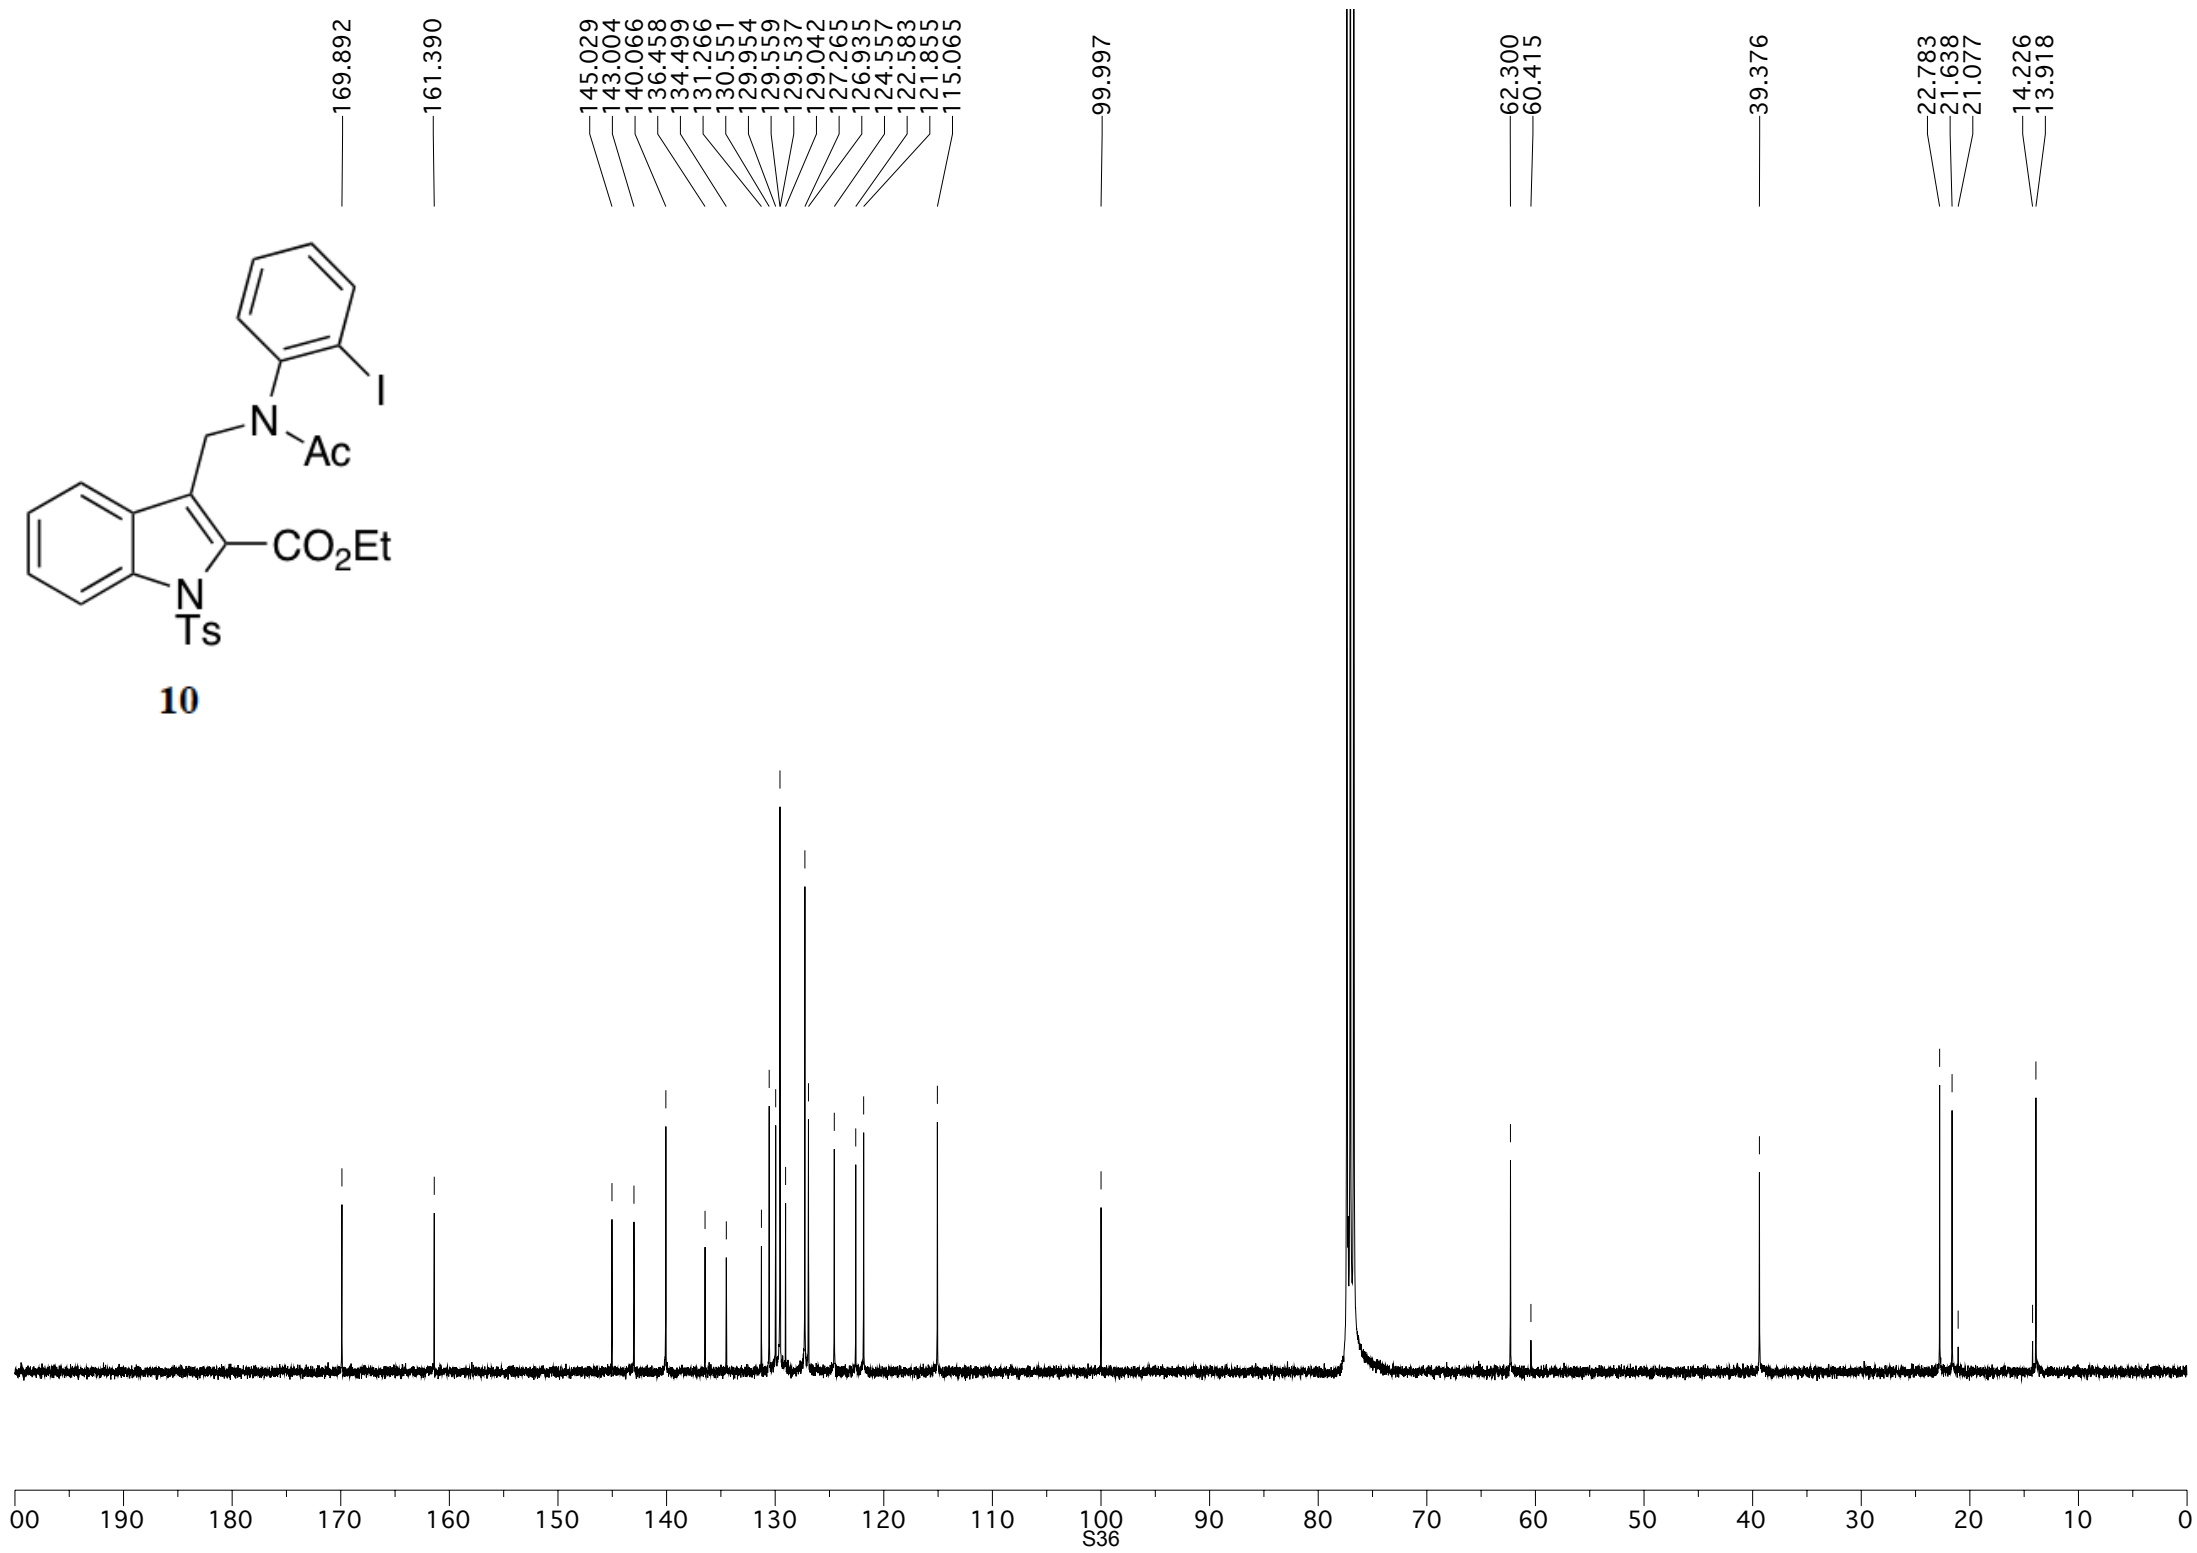

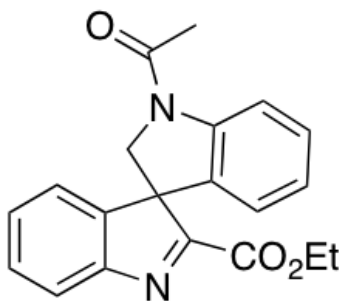

**11**

8.370  
8.350

7.909  
7.890  
7.504  
7.485  
7.467  
7.419  
7.401  
7.383  
7.315  
7.295  
7.271

6.905  
6.886  
6.867

6.433  
6.414

4.815  
4.784  
4.739  
4.712

4.312  
4.305  
4.295  
4.285

2.590

2.283

1.278  
1.260  
1.242

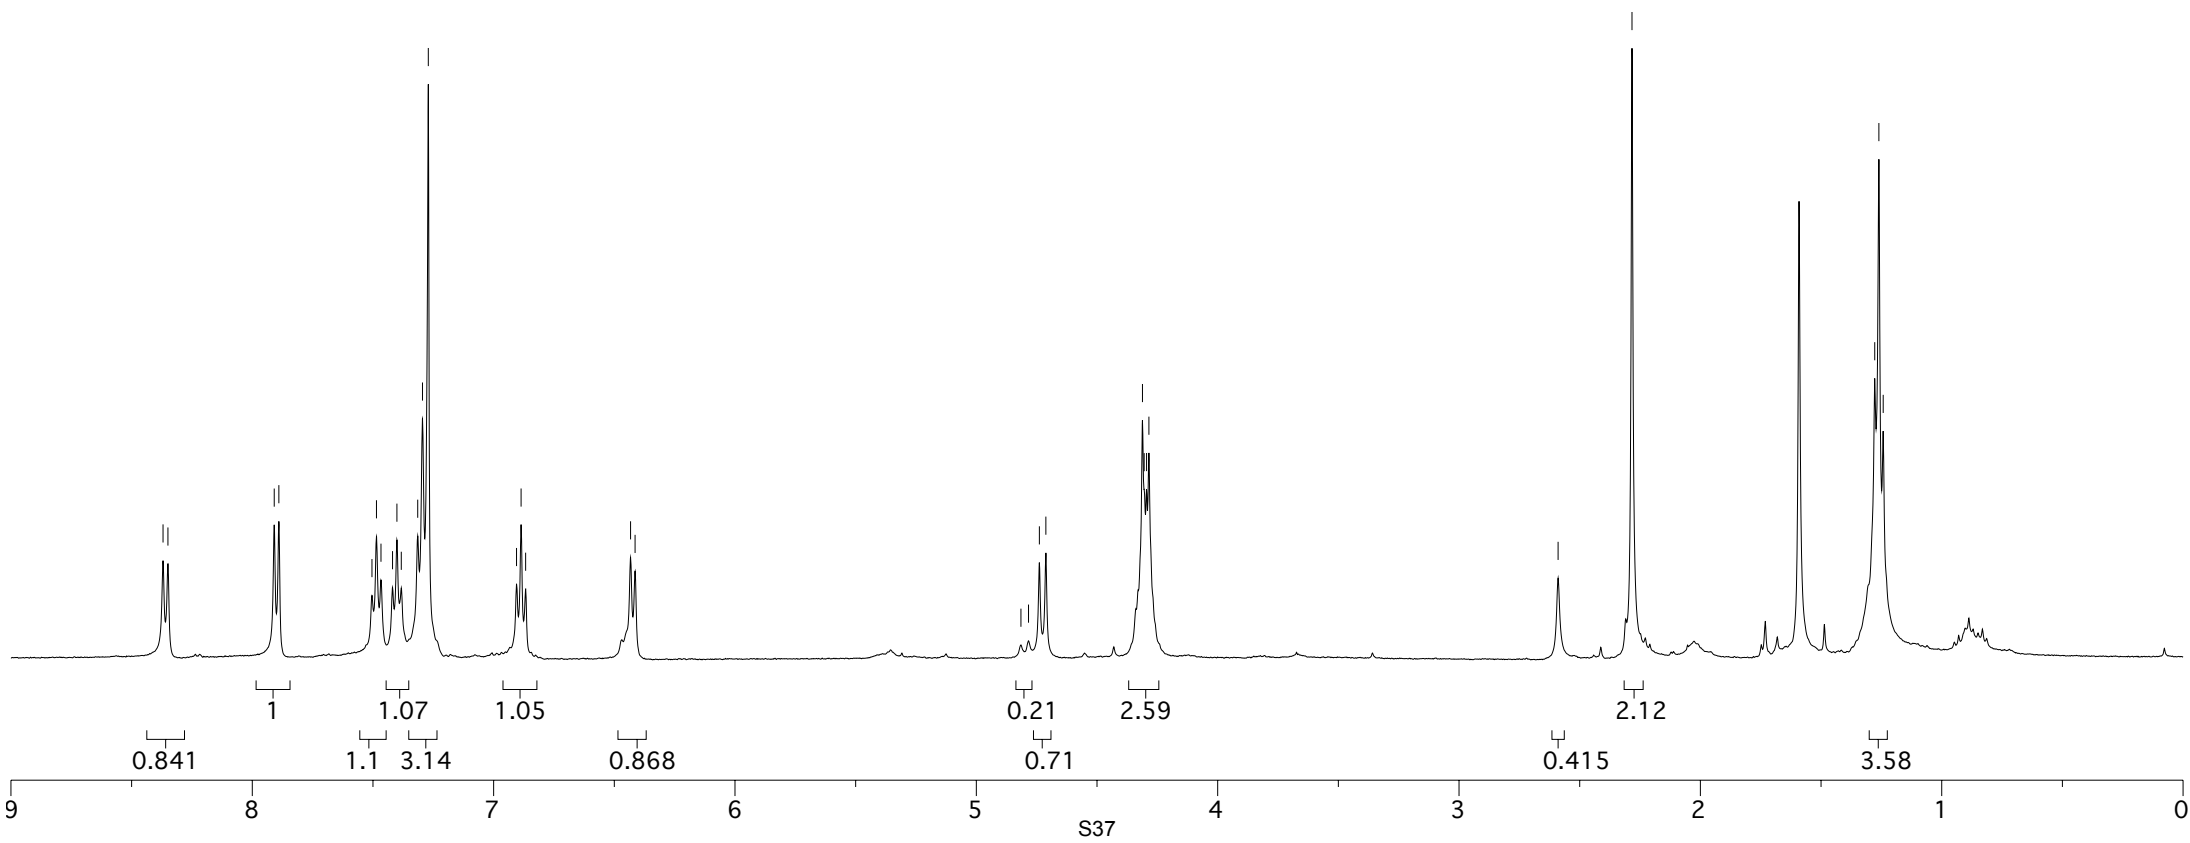

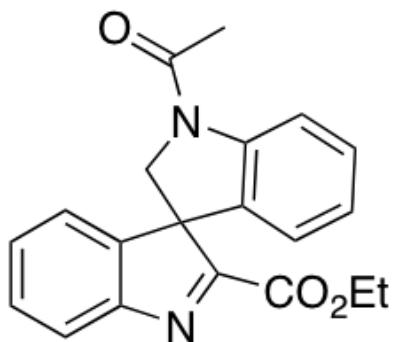

**11**

171.337  
168.163  
160.718  
152.628  
145.182  
144.208  
129.758  
129.455  
128.873  
124.041  
123.858  
122.661  
122.320  
118.068

64.197  
62.284  
55.419  
29.719  
24.354  
14.007

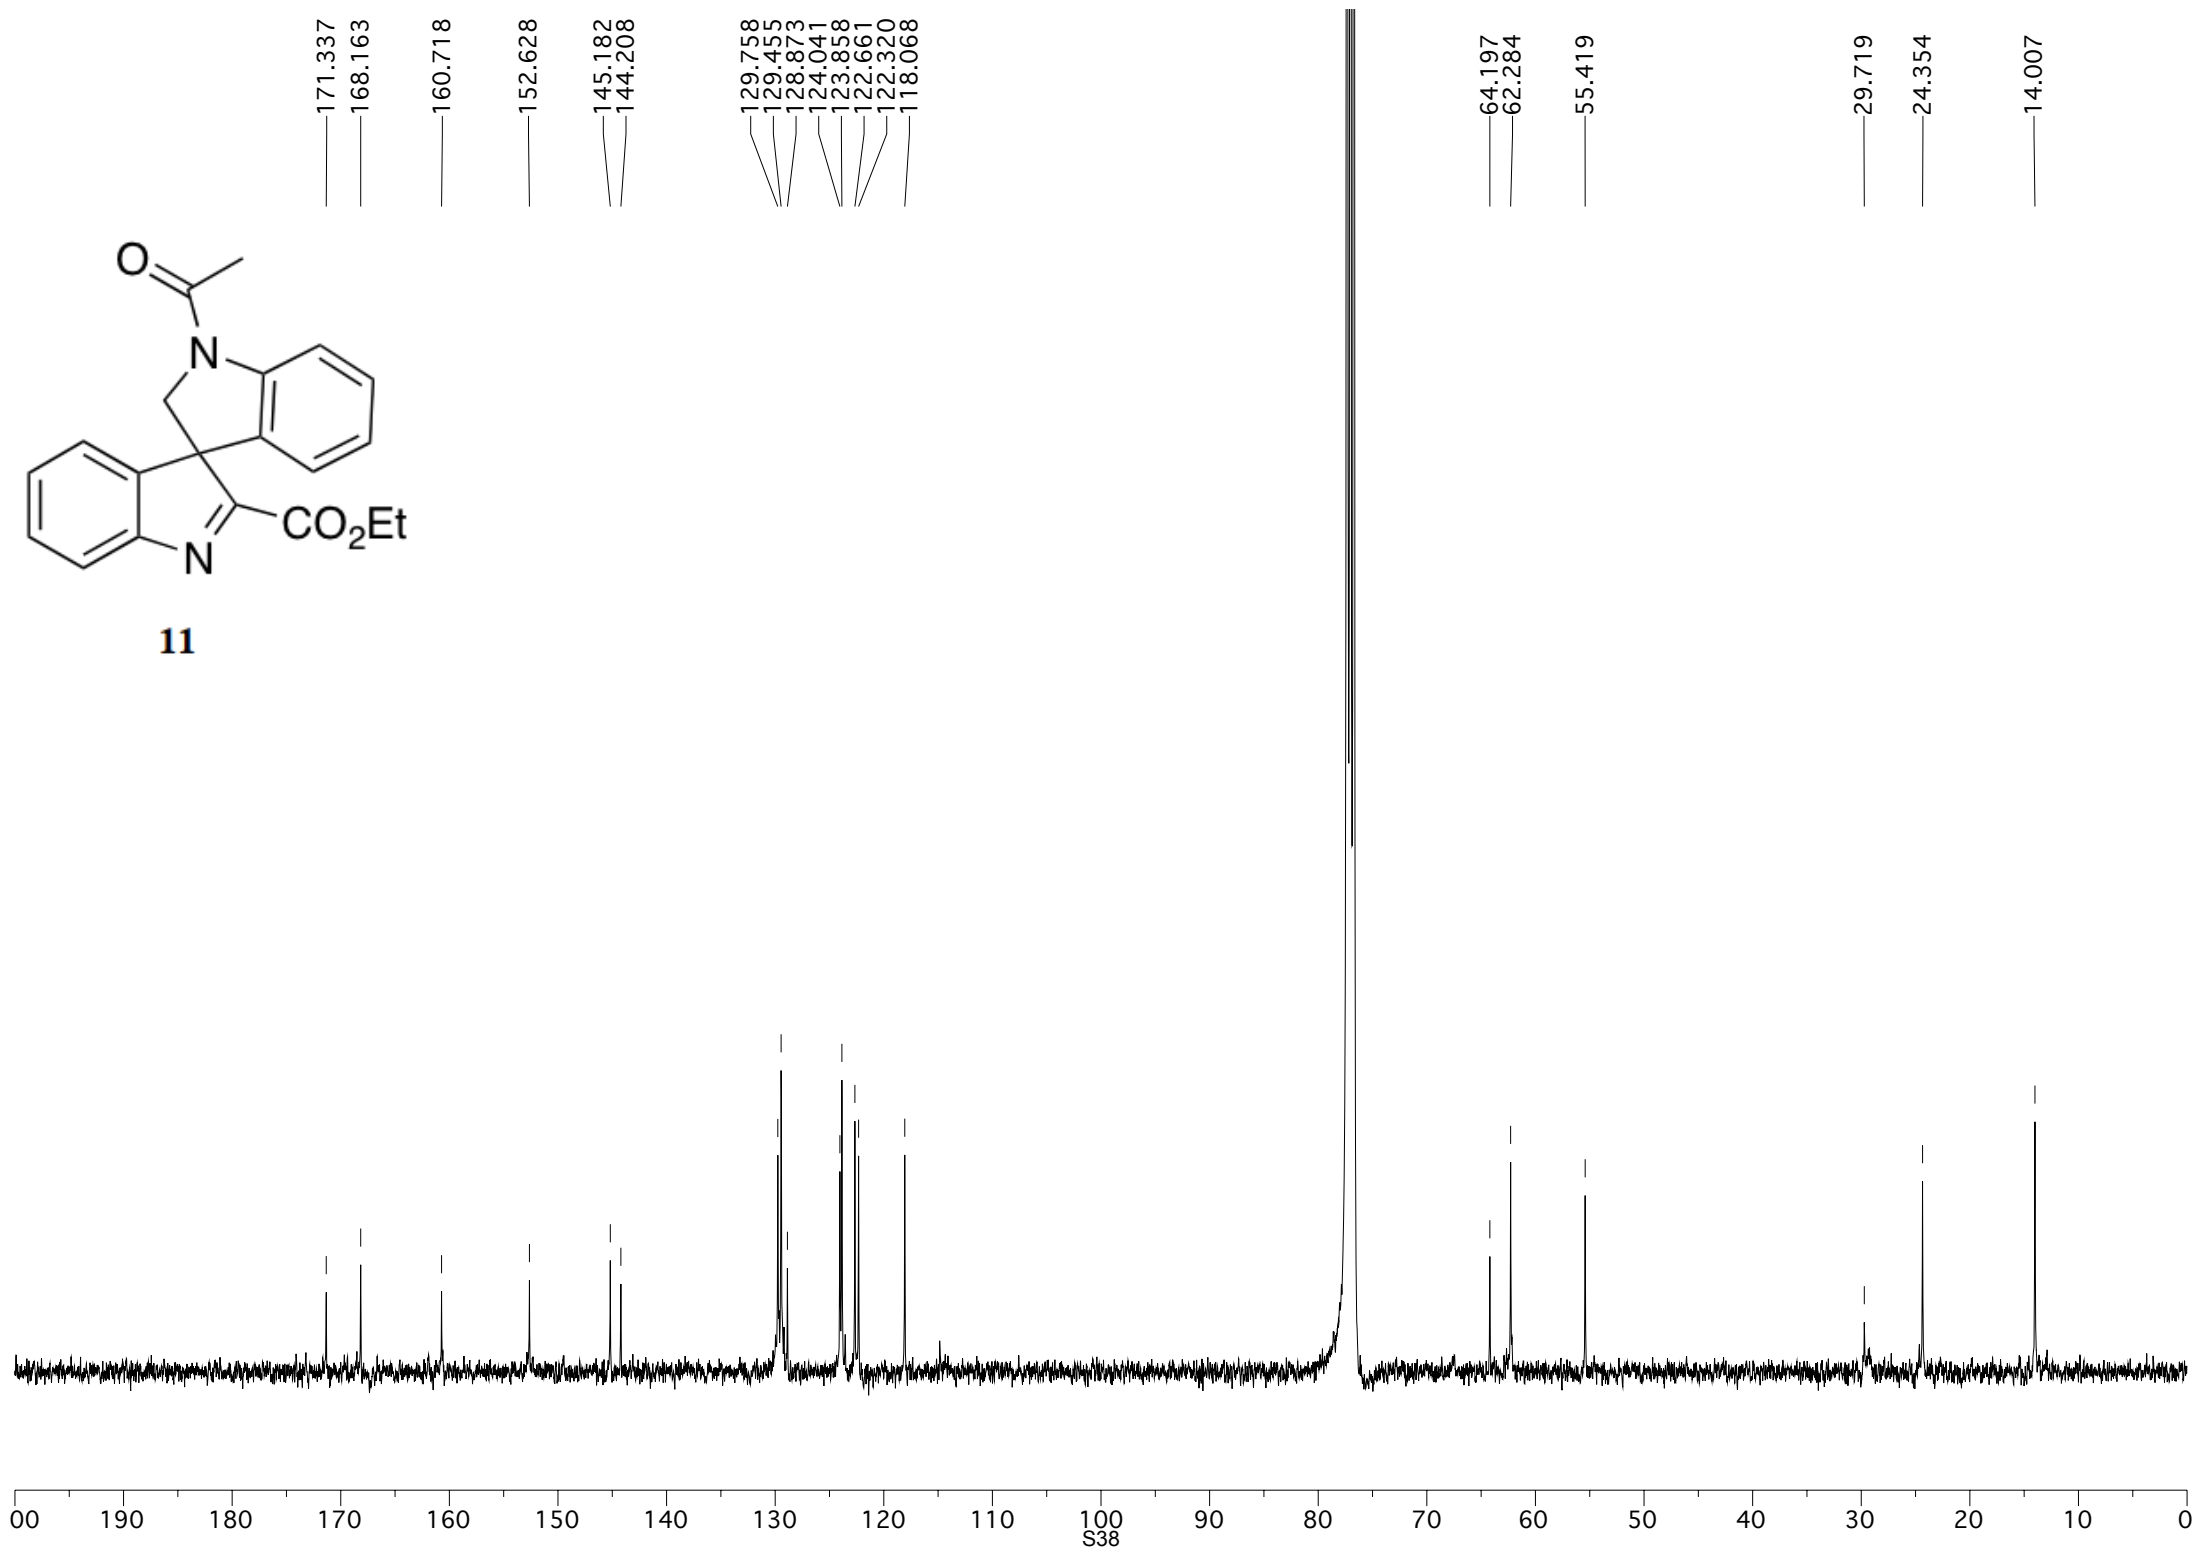

oh069.026 500

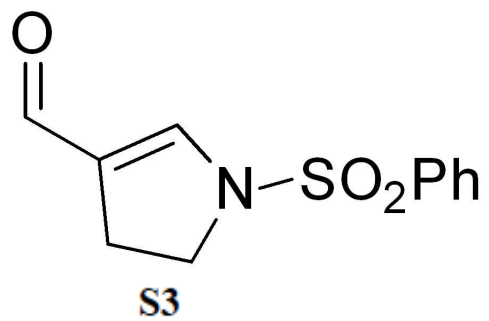

9.554

7.832  
7.817  
7.678  
7.662  
7.648  
7.590  
7.574  
7.559  
7.390

3.746  
3.727  
3.708

2.799  
2.780  
2.761

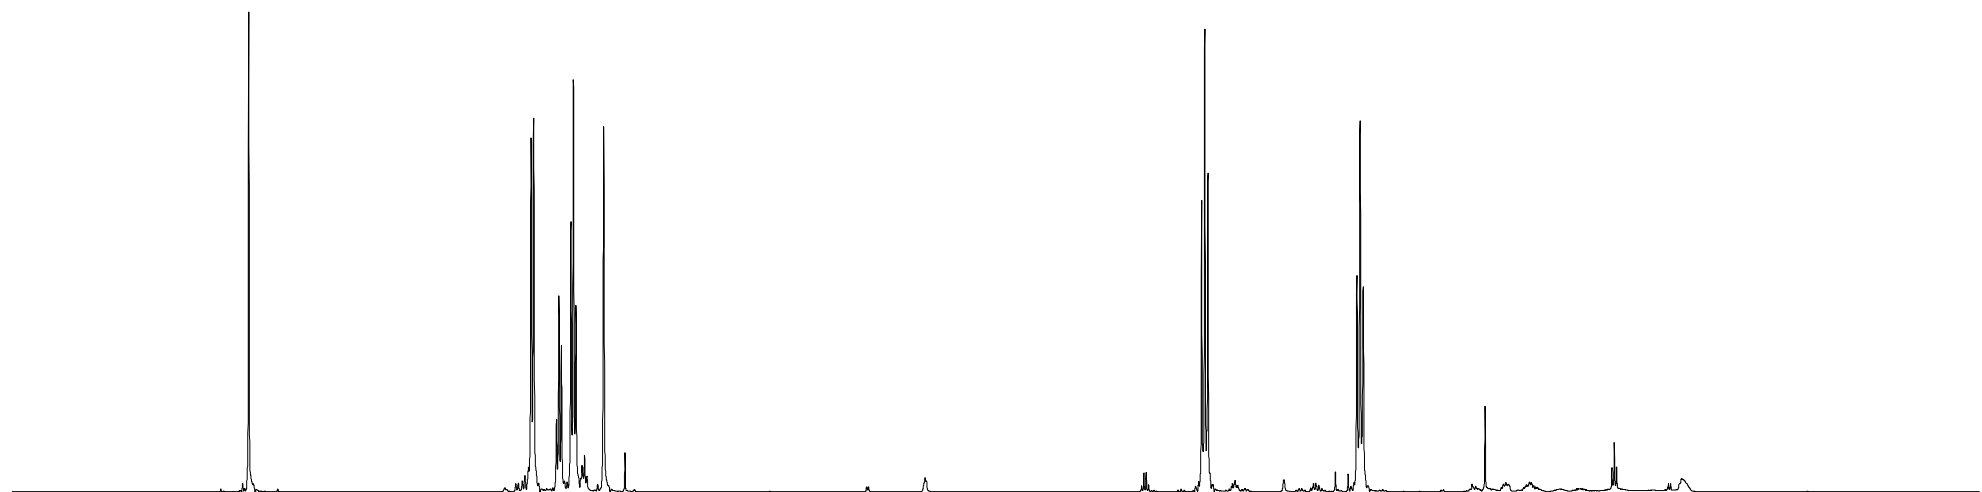

1.00

2.16  
1.06  
2.23

2.28

2.24

bh069.026\_C 500

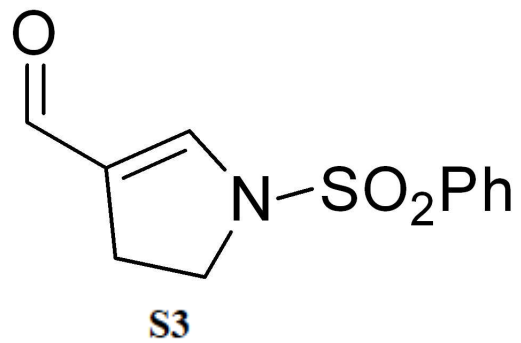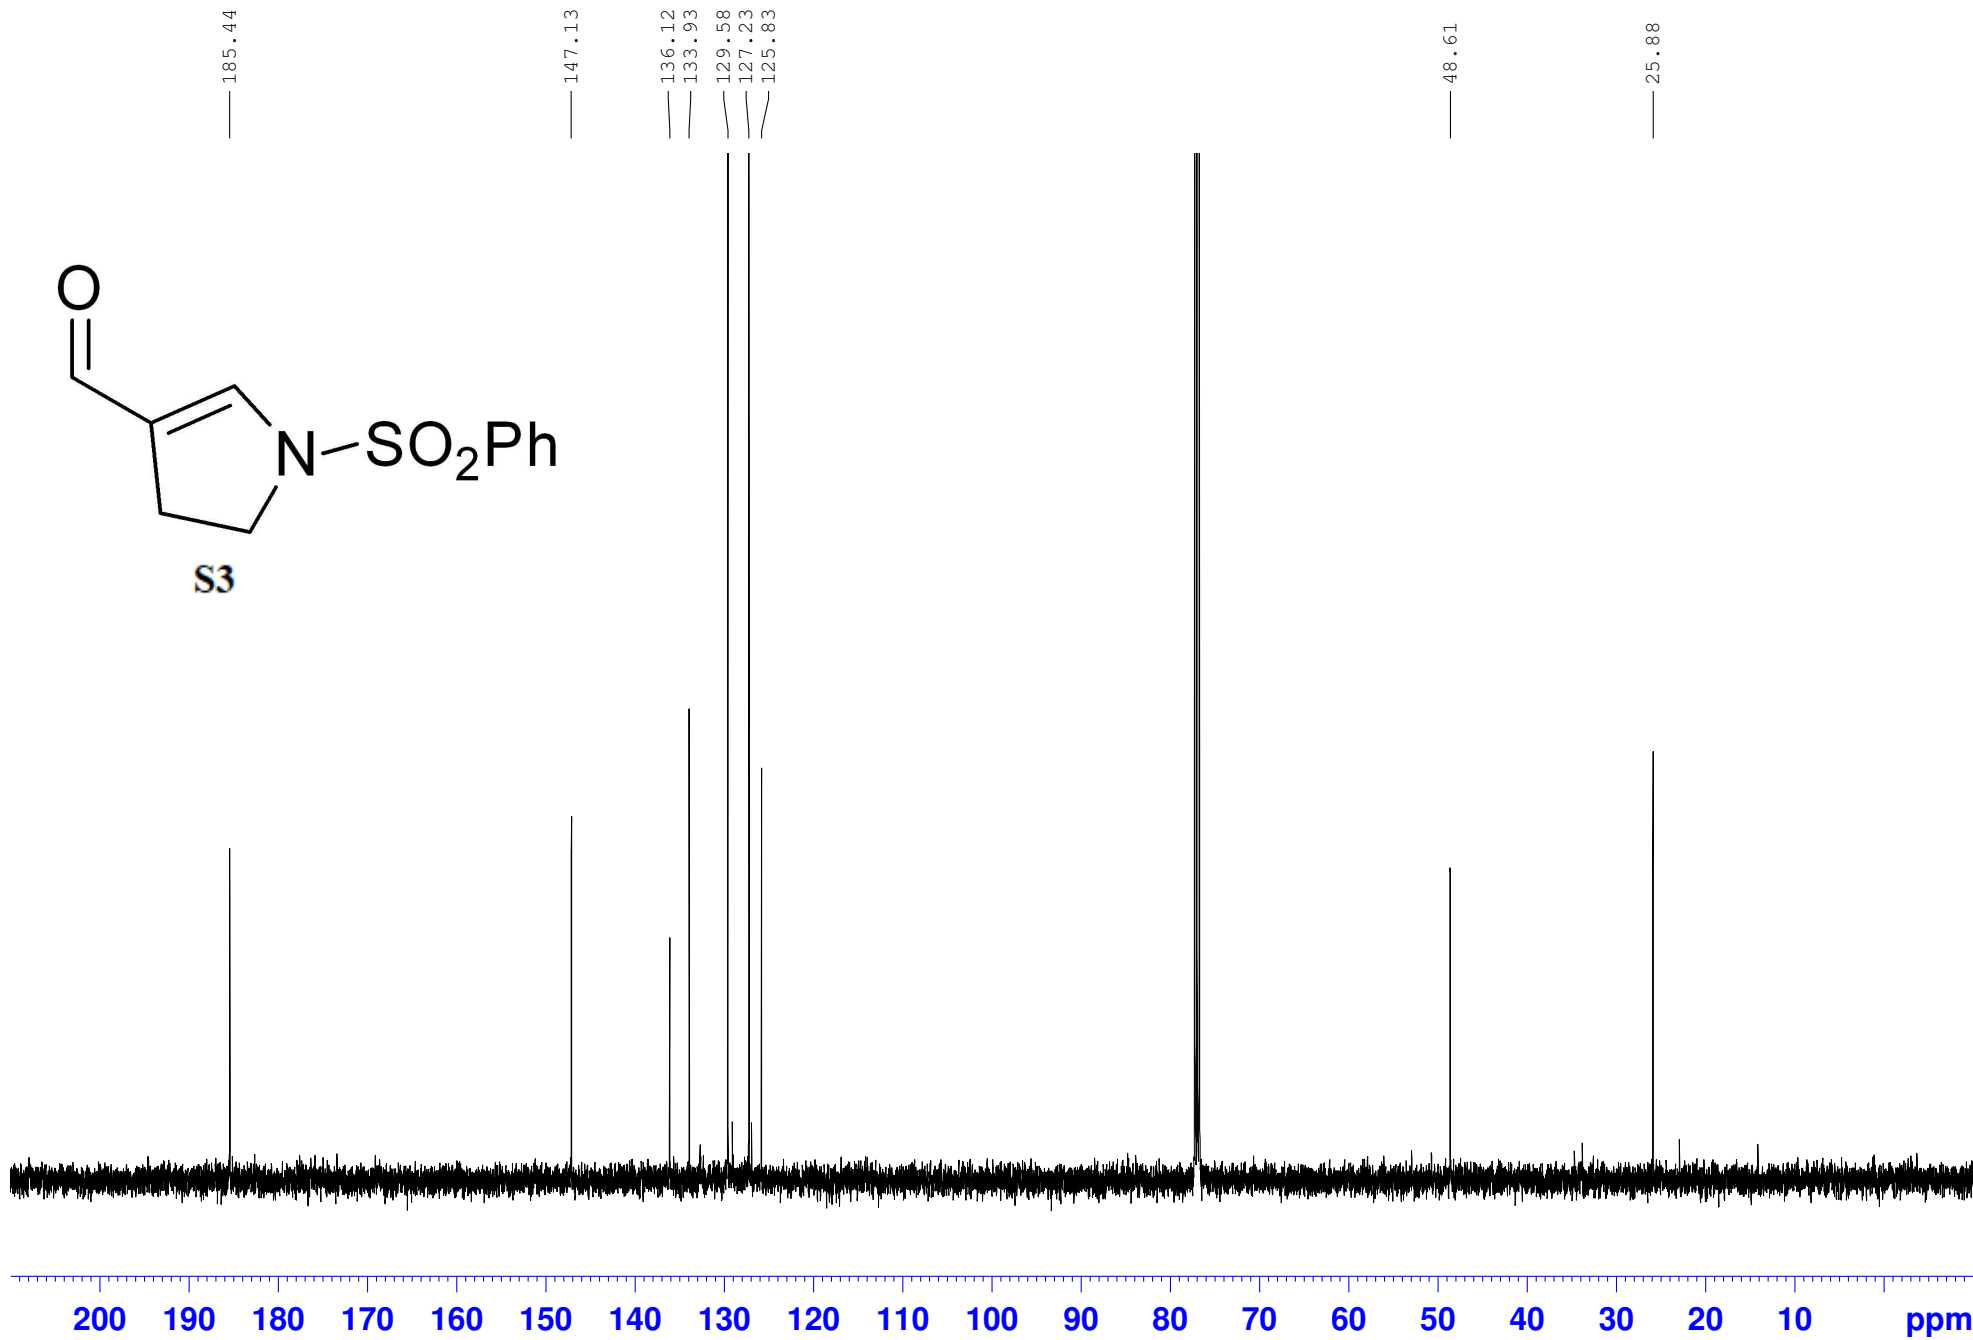



bh069.028.15-40 400b

7.831  
7.811  
7.680  
7.662  
7.643  
7.595  
7.575  
7.556  
7.457

3.738  
3.715  
3.691  
2.808  
2.784  
2.761

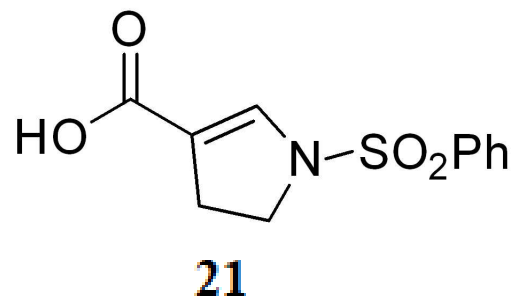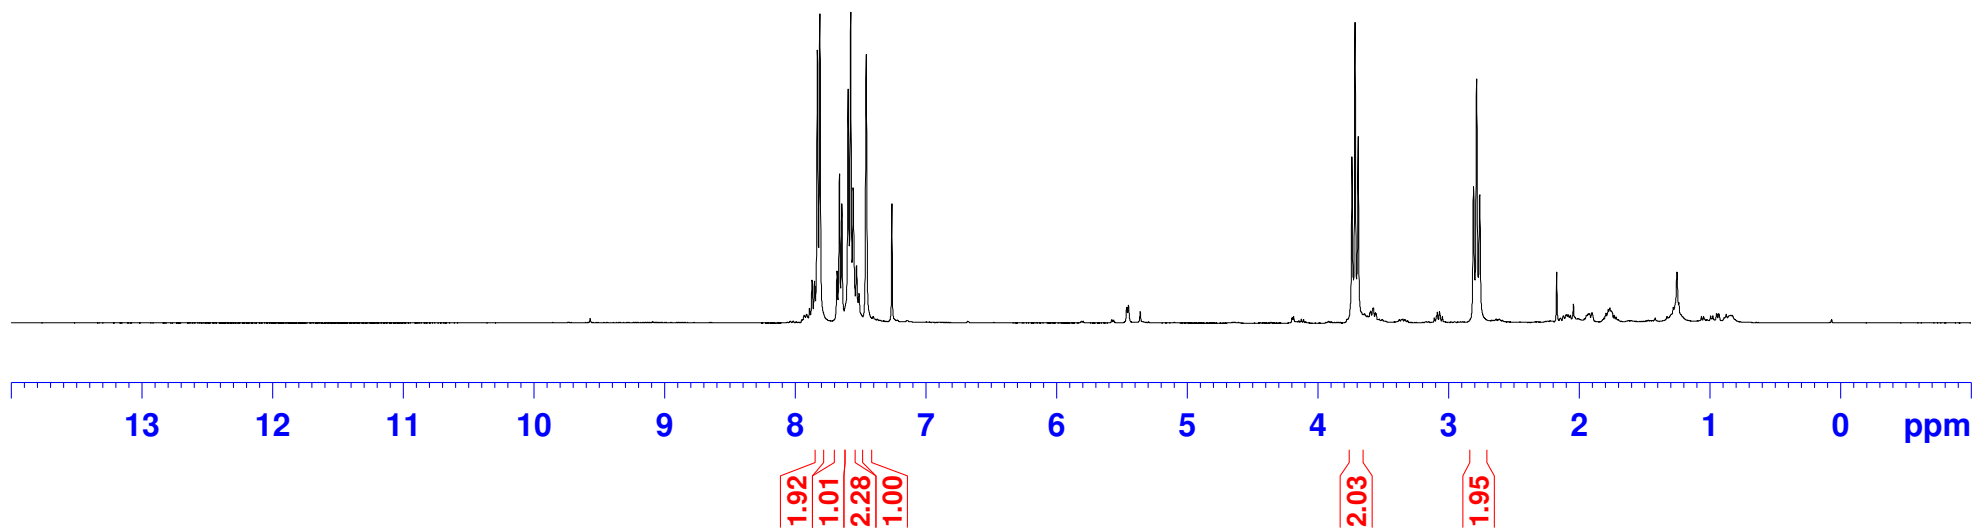

bh069.028.15-40\_C 400b

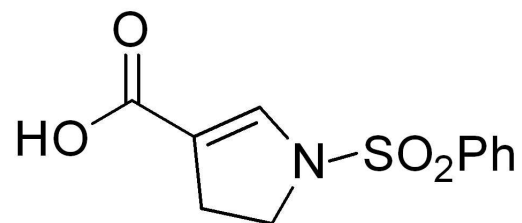

**21**

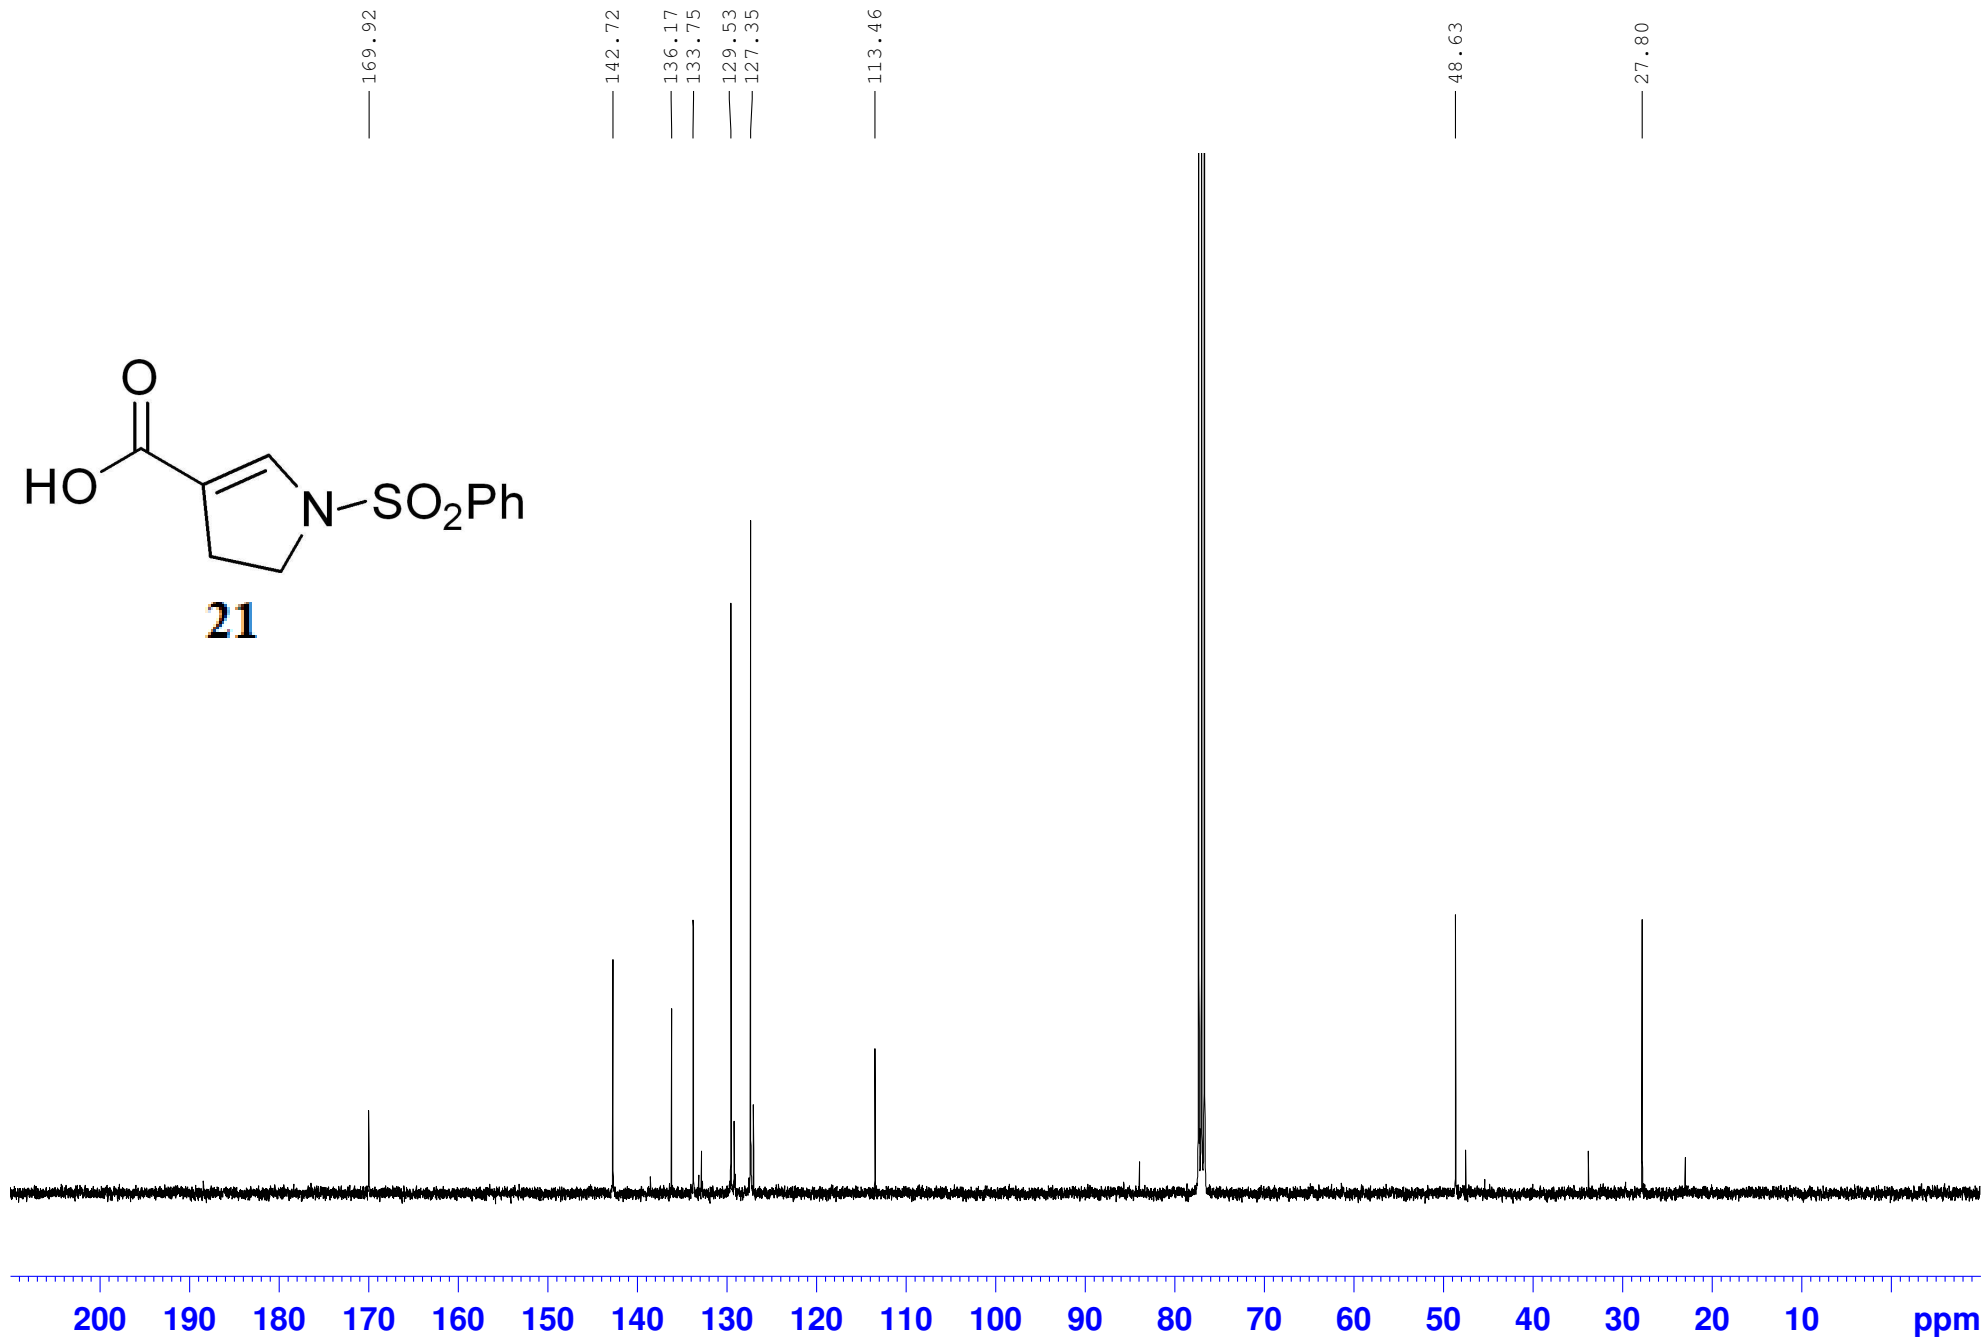

bh090.040 400B

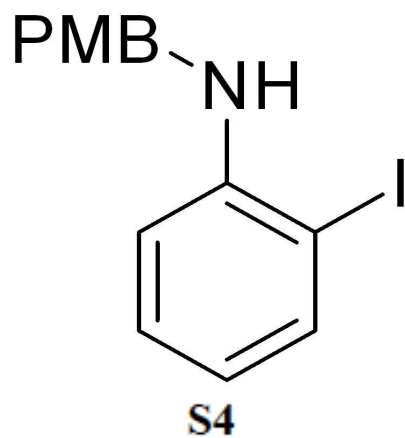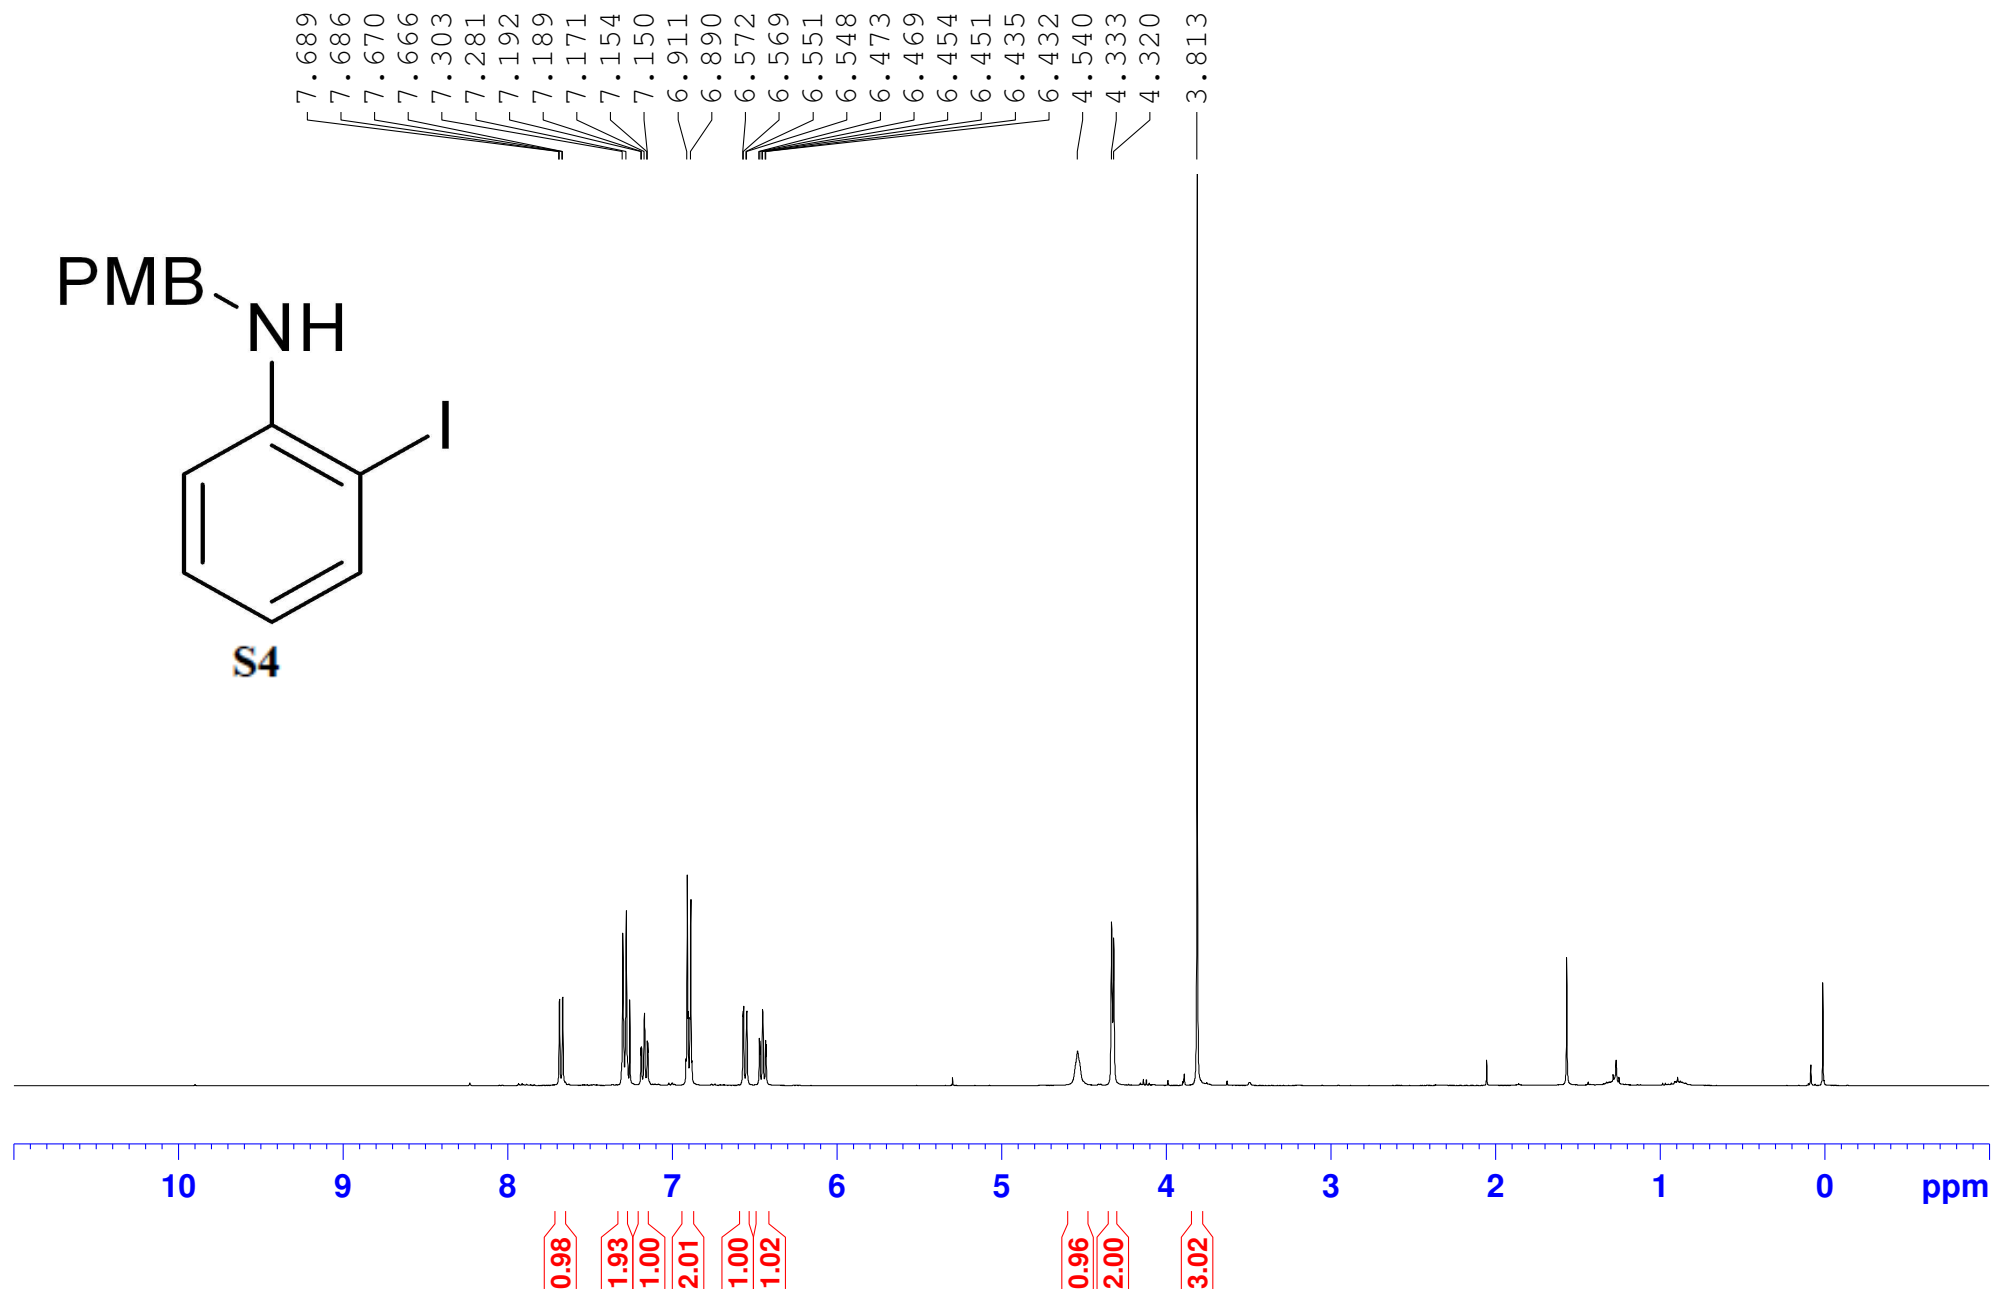

bh090.040\_C 400B

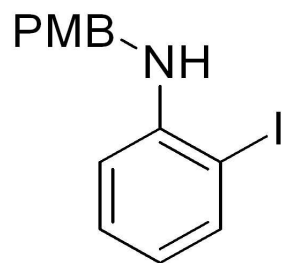

S4

- 158.88
- 147.08
- 138.95
- 130.54
- 129.39
- 128.49
- 118.74
- 114.09
- 110.91
- 85.28
- 55.27
- 47.82

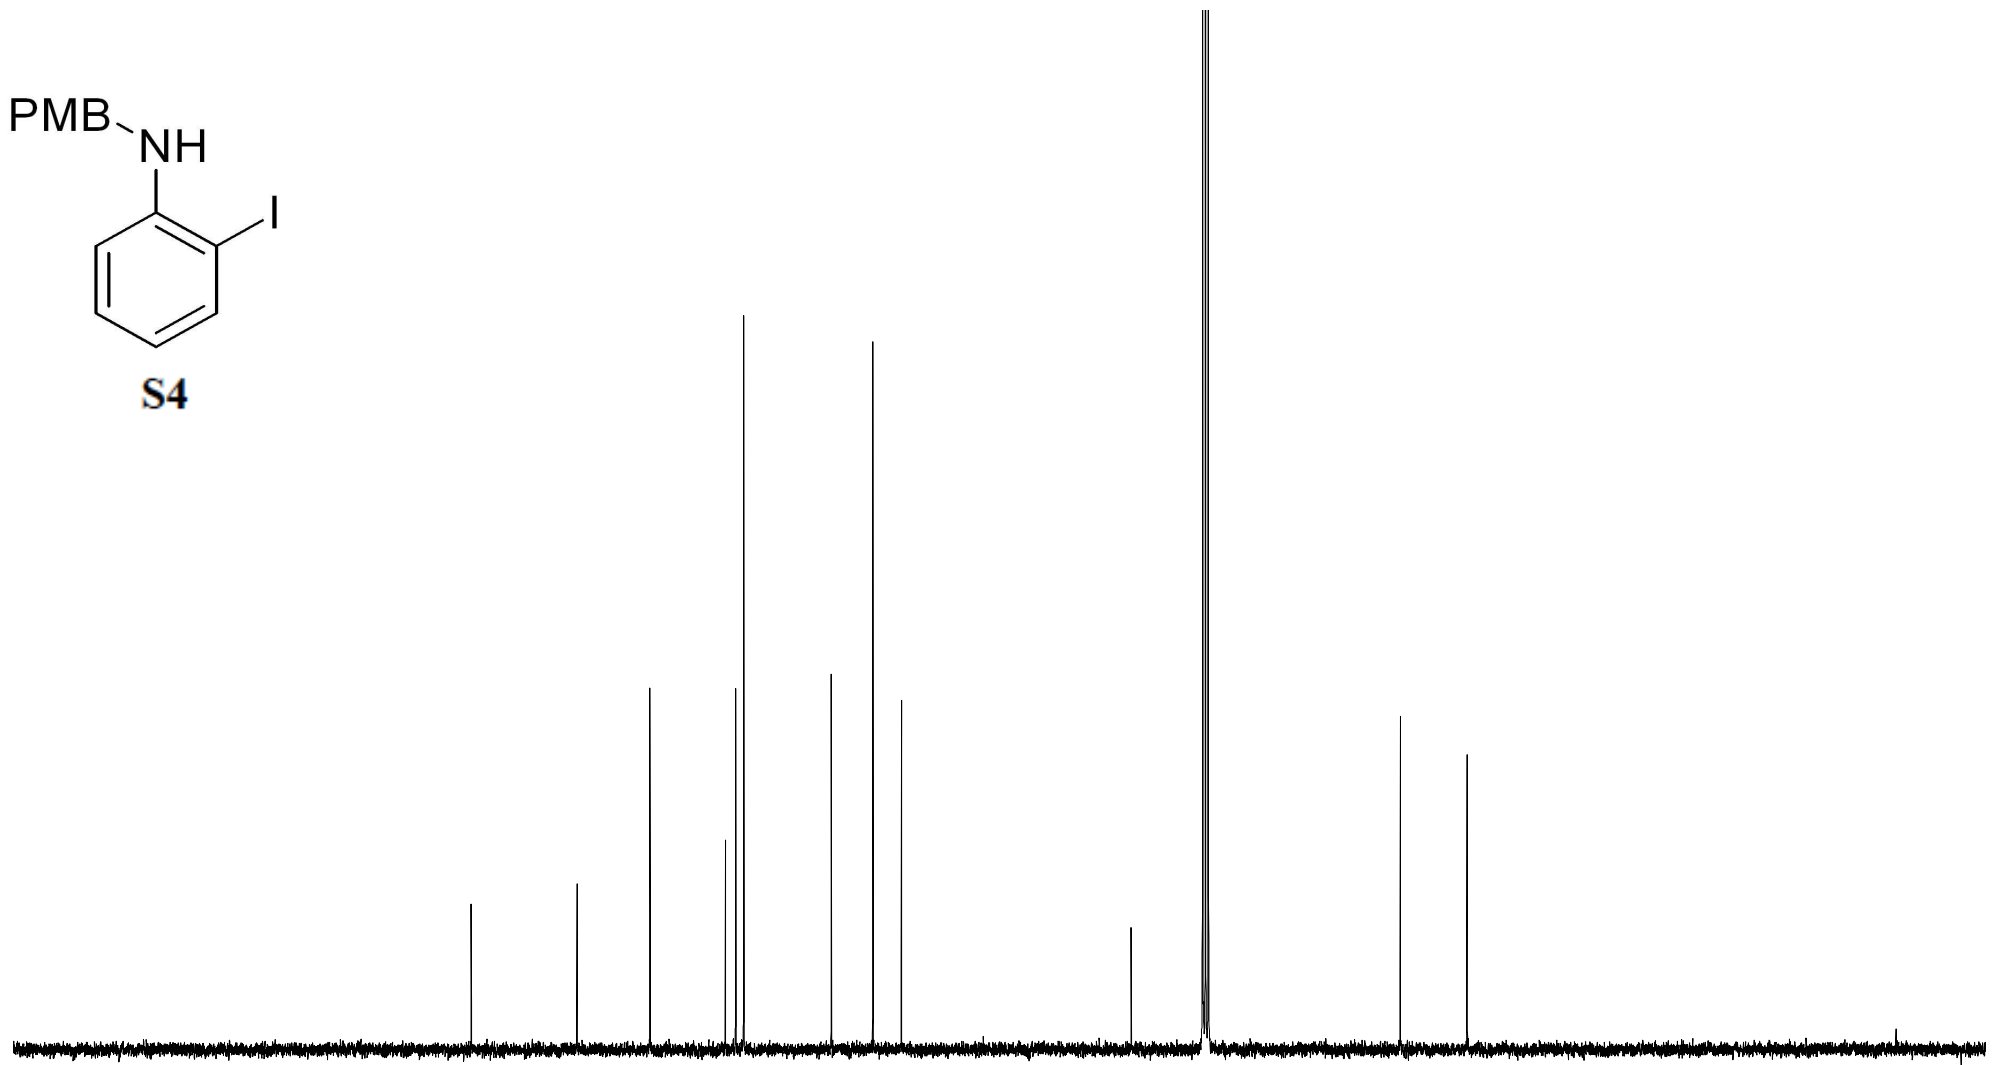

200 190 180 170 160 150 140 130 120 110 100 90 80 70 60 50 40 30 20 10 ppm

bh090.050 500

7.951  
7.949  
7.936  
7.933  
7.602  
7.595  
7.592  
7.587  
7.585  
7.577  
7.490  
7.488  
7.480  
7.300  
7.297  
7.285  
7.282  
7.269  
7.266  
7.127  
7.124  
7.112  
7.107  
7.103  
7.097  
7.094  
7.090  
6.786  
6.783  
6.772  
6.768  
6.758  
6.755  
5.833  
5.508  
5.480  
4.031  
4.002  
3.754  
3.448  
3.442  
3.440  
3.428  
3.426  
3.420  
3.406  
3.308  
3.291  
3.288  
3.285  
3.271  
3.269  
3.265  
2.657  
2.653  
2.651  
2.571  
2.557

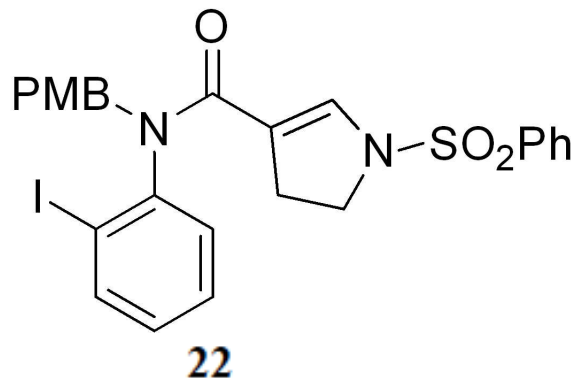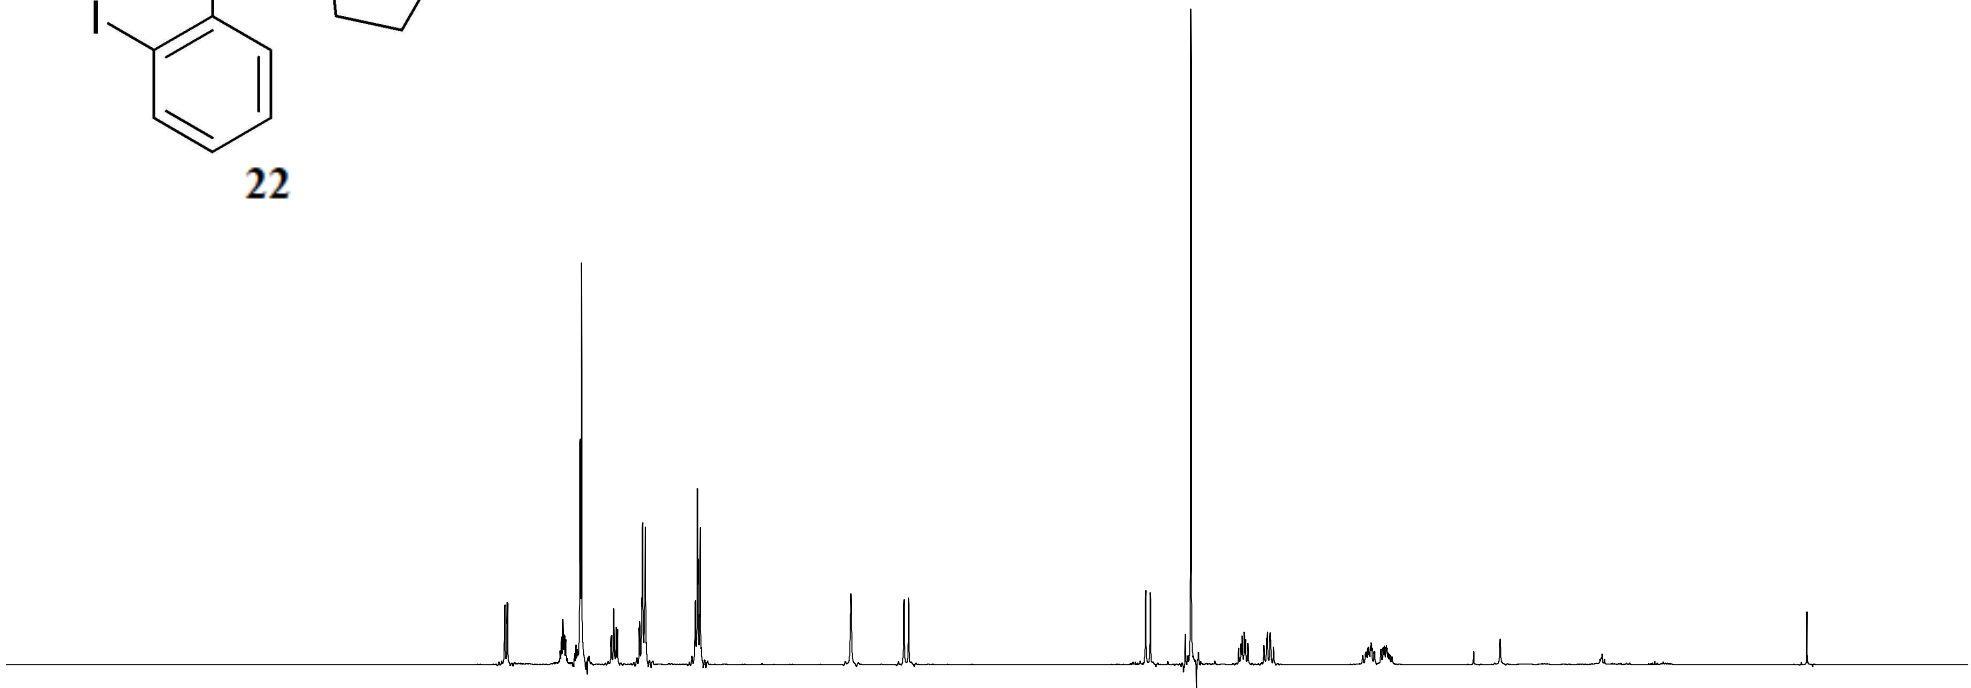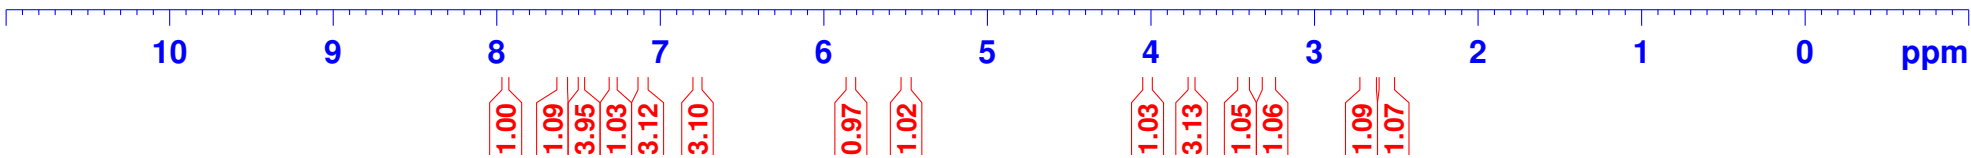

bh090.050\_C 500

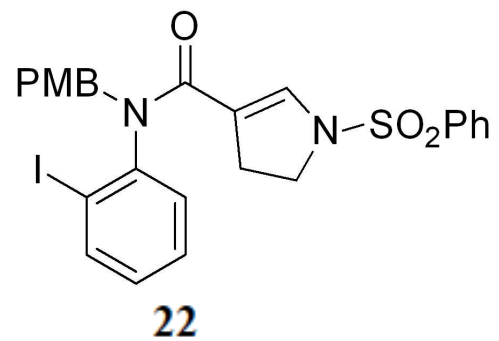

163.97  
158.98  
144.09  
140.17  
136.72  
135.67  
133.22  
131.14  
130.76  
129.99  
129.24  
129.19  
128.62  
127.21  
118.13  
113.60  
100.91  
55.10  
51.95  
47.03  
30.77

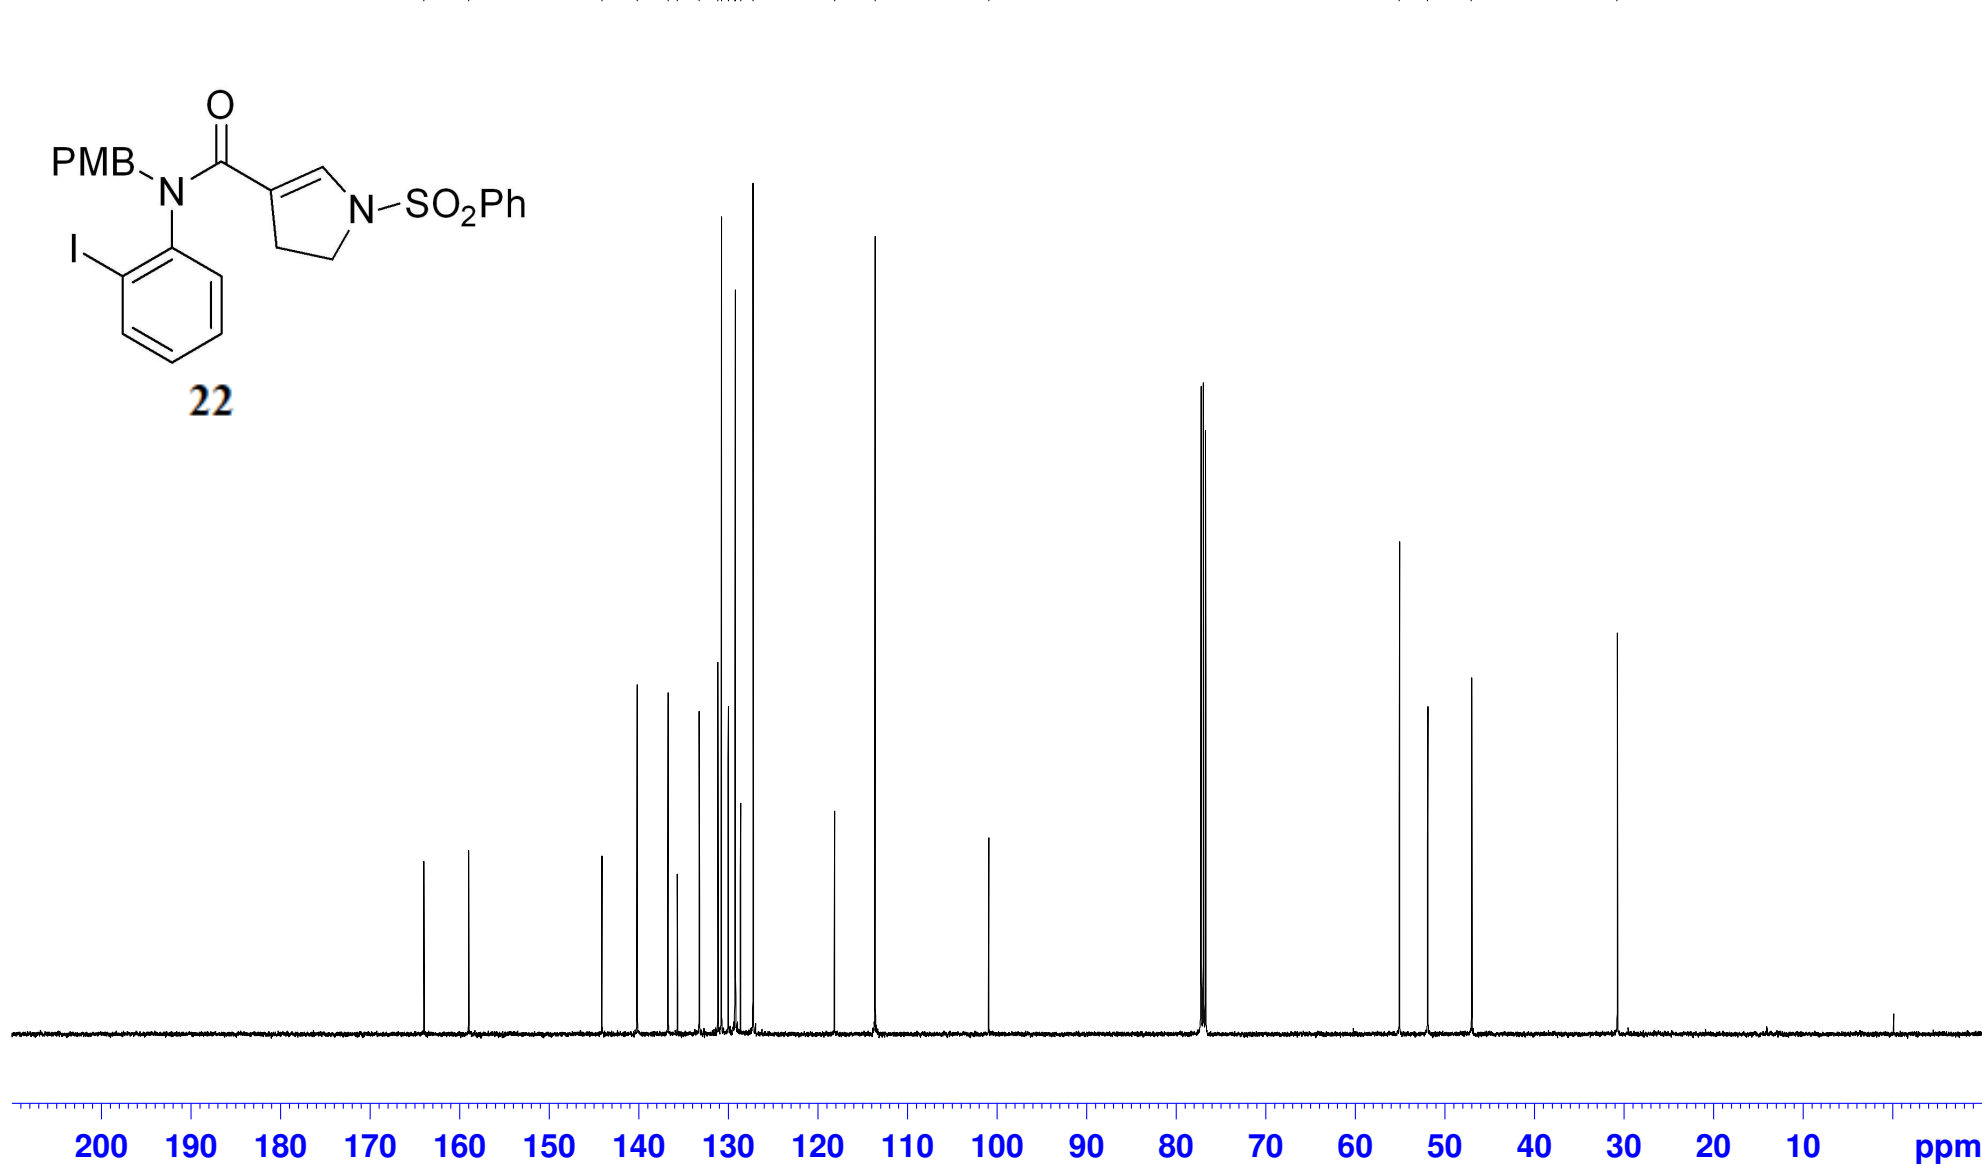

bh090.020.7-11 400b

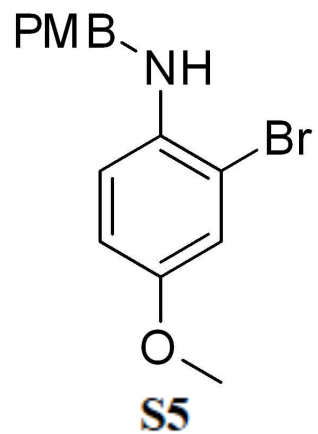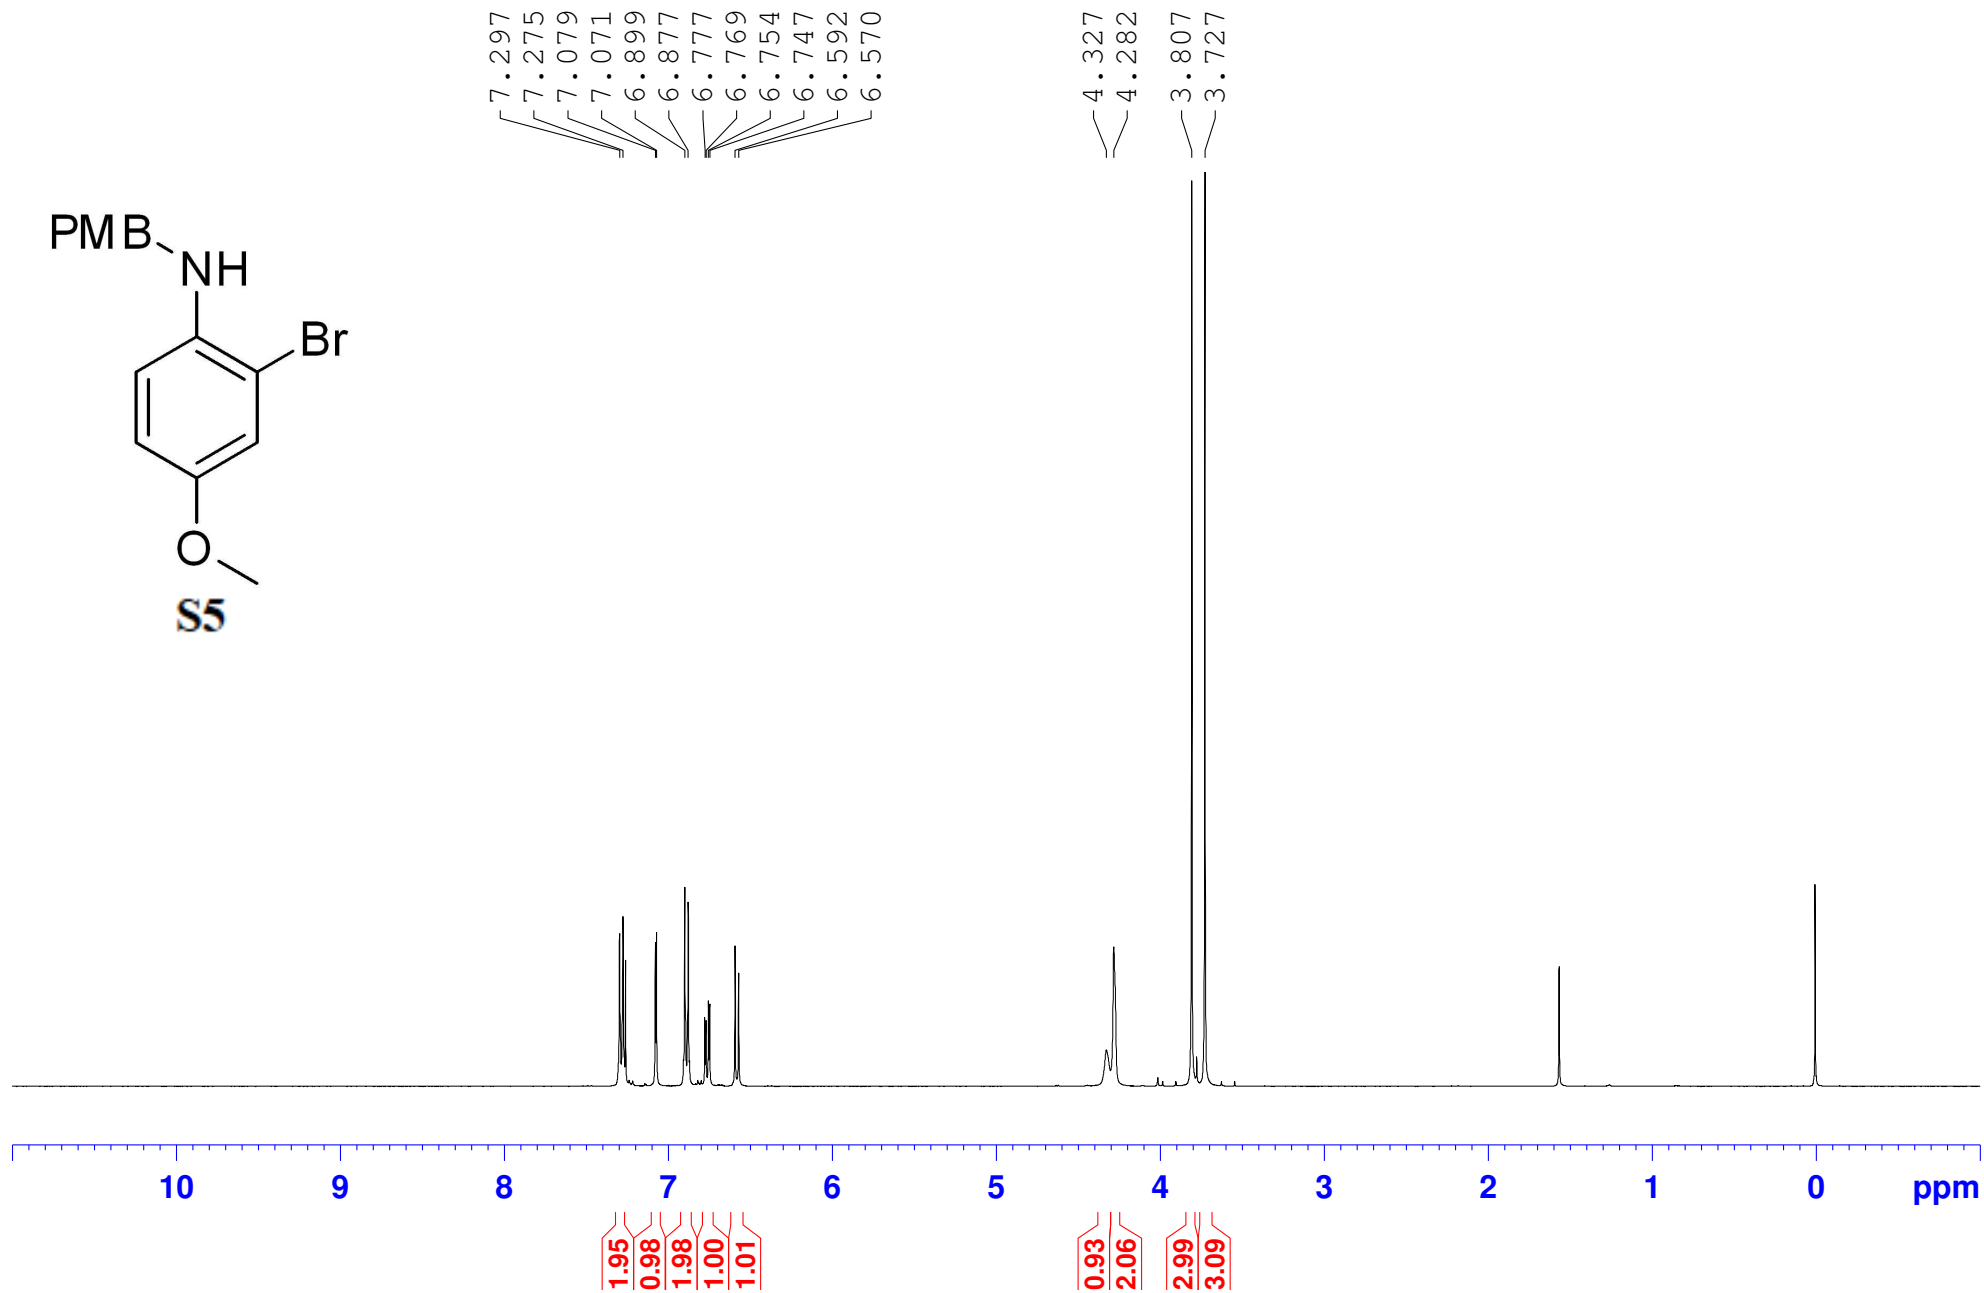

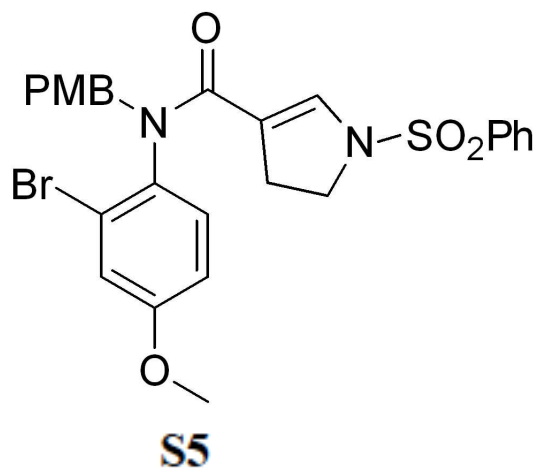

4.75  
9.78  
9.00

136.71  
135.85  
133.56  
133.28  
132.00  
130.79  
129.20  
128.95  
127.30  
124.57  
118.99  
118.24  
113.75  
113.65

55.86  
55.19  
51.90  
47.27

30.69

19.22

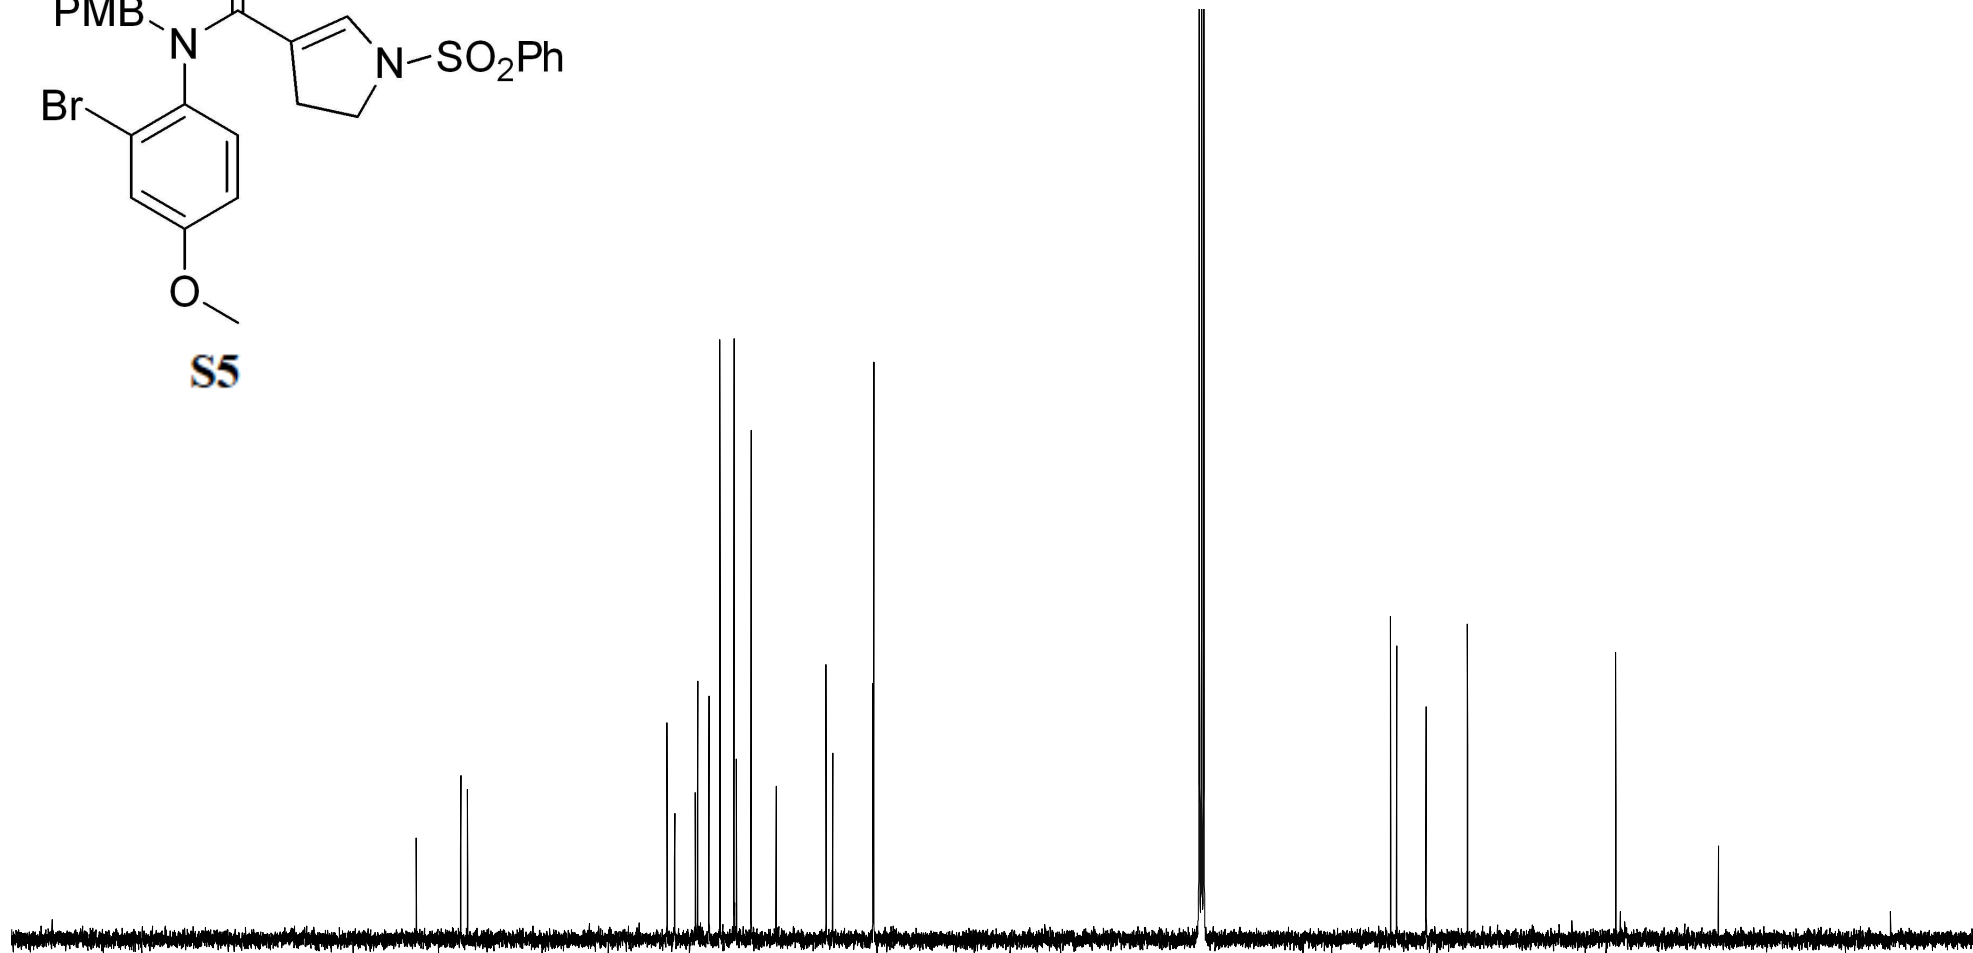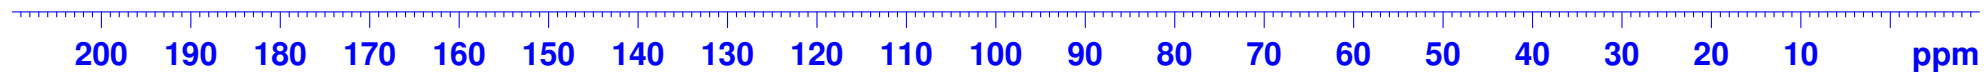



bh090.012.36-42 500

7.621  
7.617  
7.611  
7.607  
7.604  
7.597  
7.593  
7.589  
7.538  
7.536  
7.525  
7.521  
7.518  
7.512  
7.503  
7.487  
7.195  
7.189  
7.115  
7.098  
6.783  
6.766  
6.756  
6.750  
6.738  
6.733  
6.674  
6.656  
6.023  
5.481  
5.453  
4.048  
4.019  
3.841  
3.777  
3.446  
3.440  
3.426  
3.418  
3.404  
3.357  
3.341  
3.335  
3.319  
3.315  
3.299  
3.049  
2.946  
2.639  
2.636  
2.623  
2.620  
2.617  
2.537  
2.534  
2.529  
2.526  
2.515

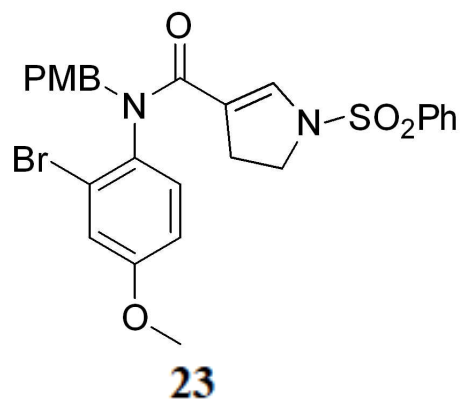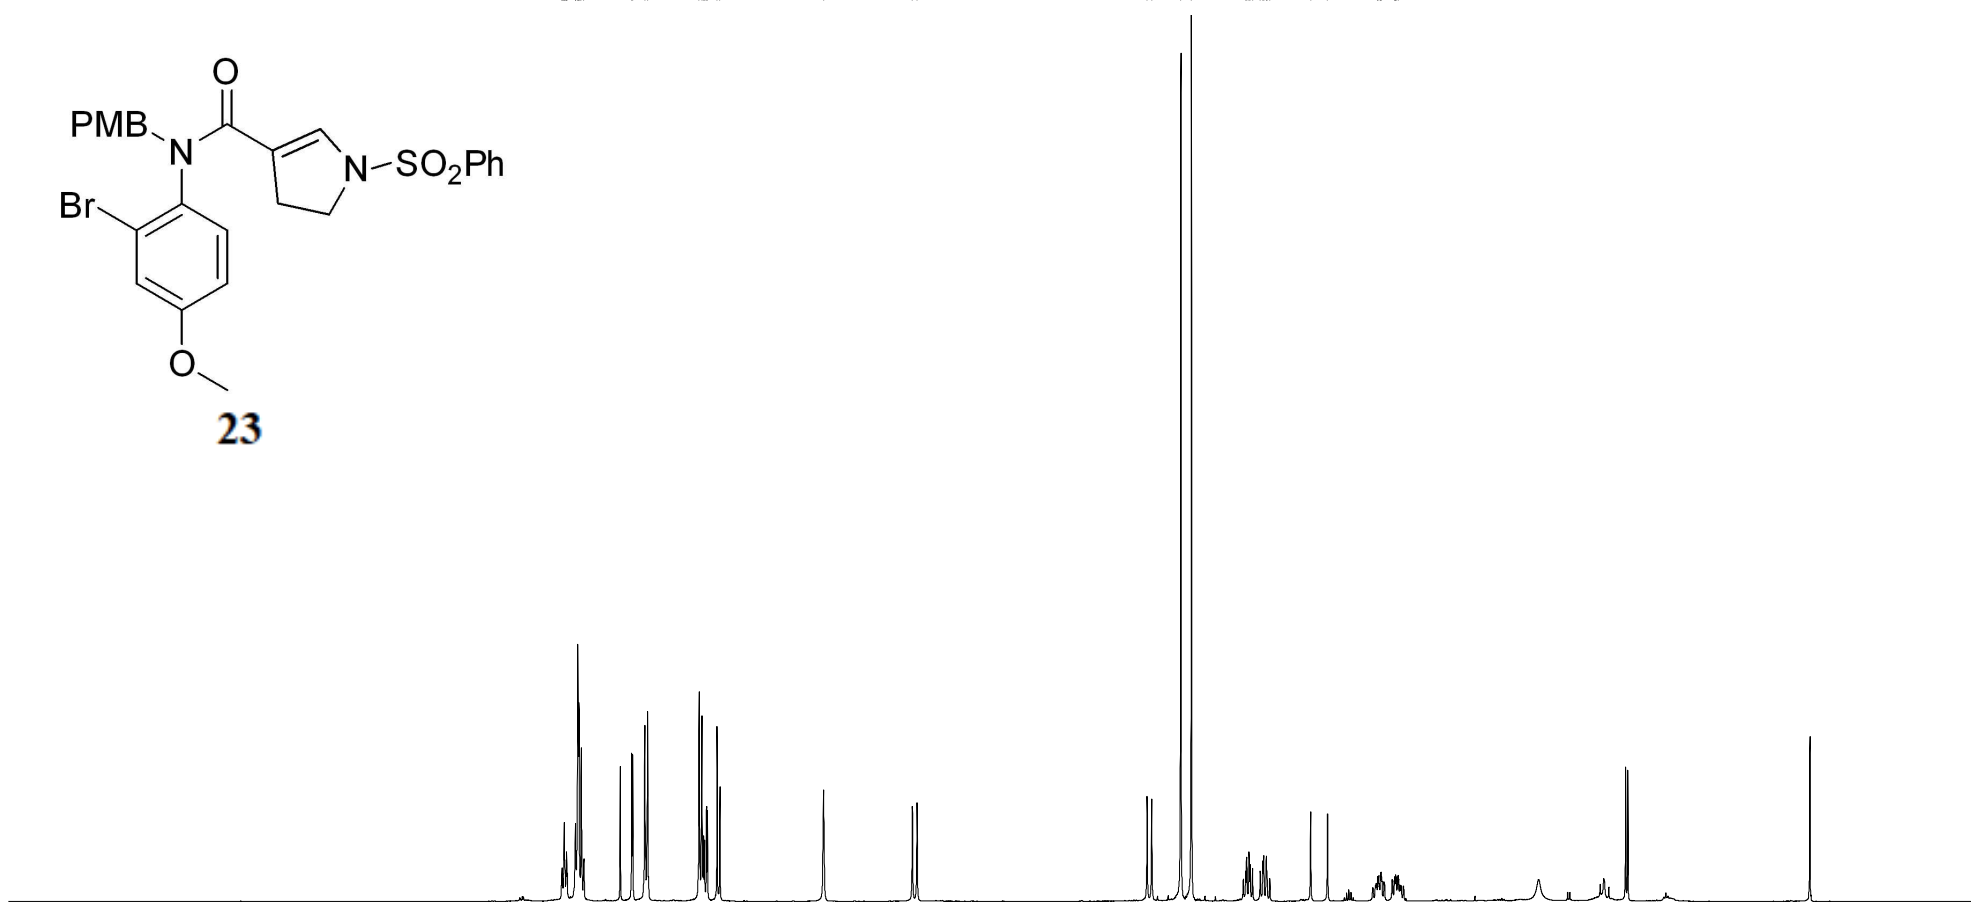

10 9 8 7 6 5 4 3 2 1 0 ppm

1.20  
4.28  
1.05  
2.11  
2.01  
1.07  
1.06  
1.00  
1.09  
1.13  
3.29  
3.26  
1.15  
1.09  
0.88  
1.11  
1.14

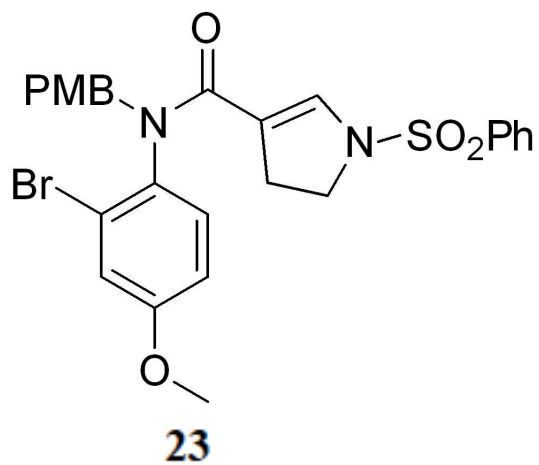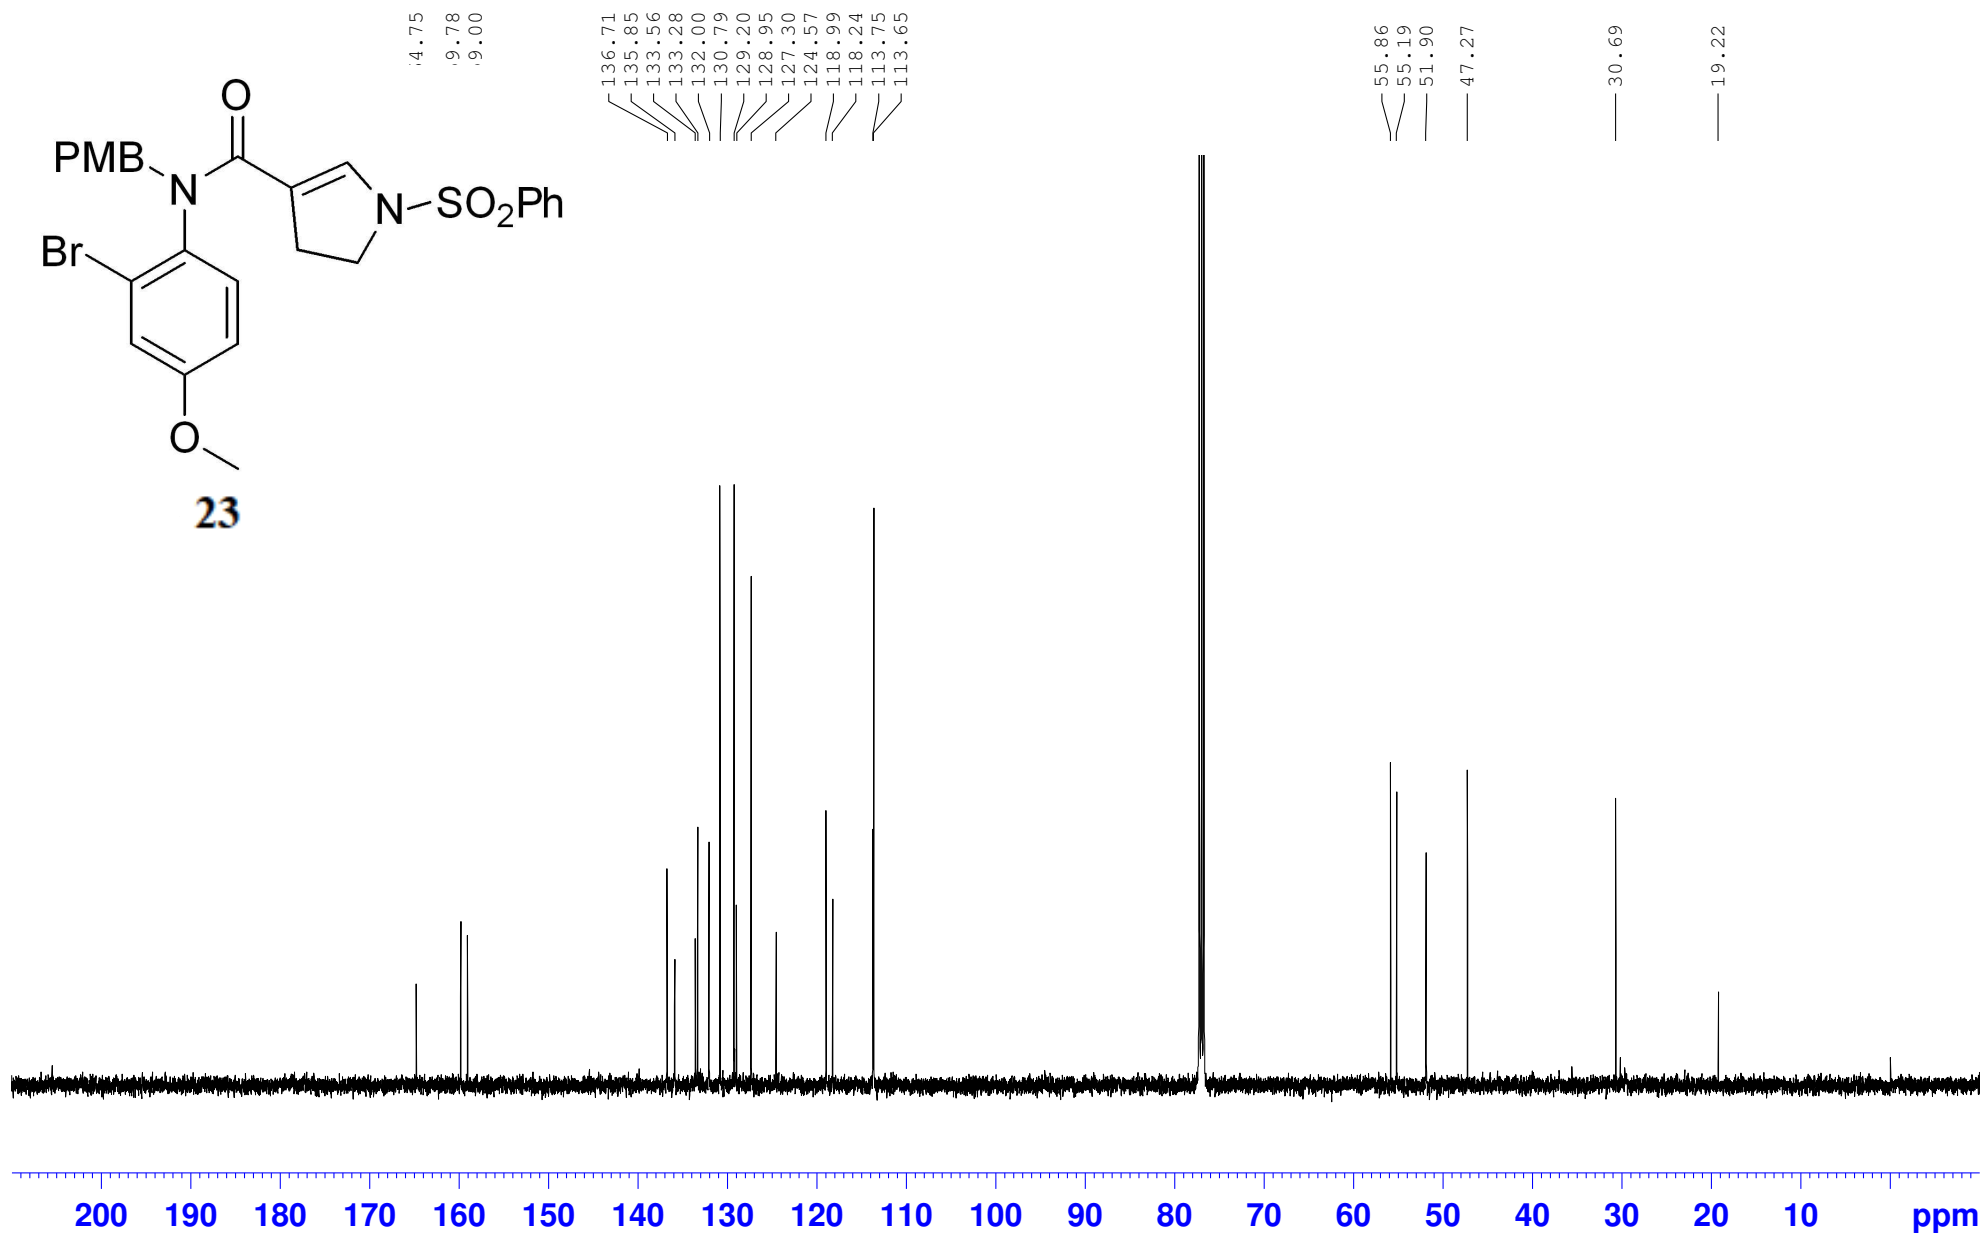

bh090.01.14-17 400b

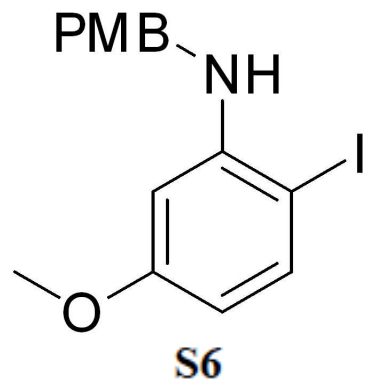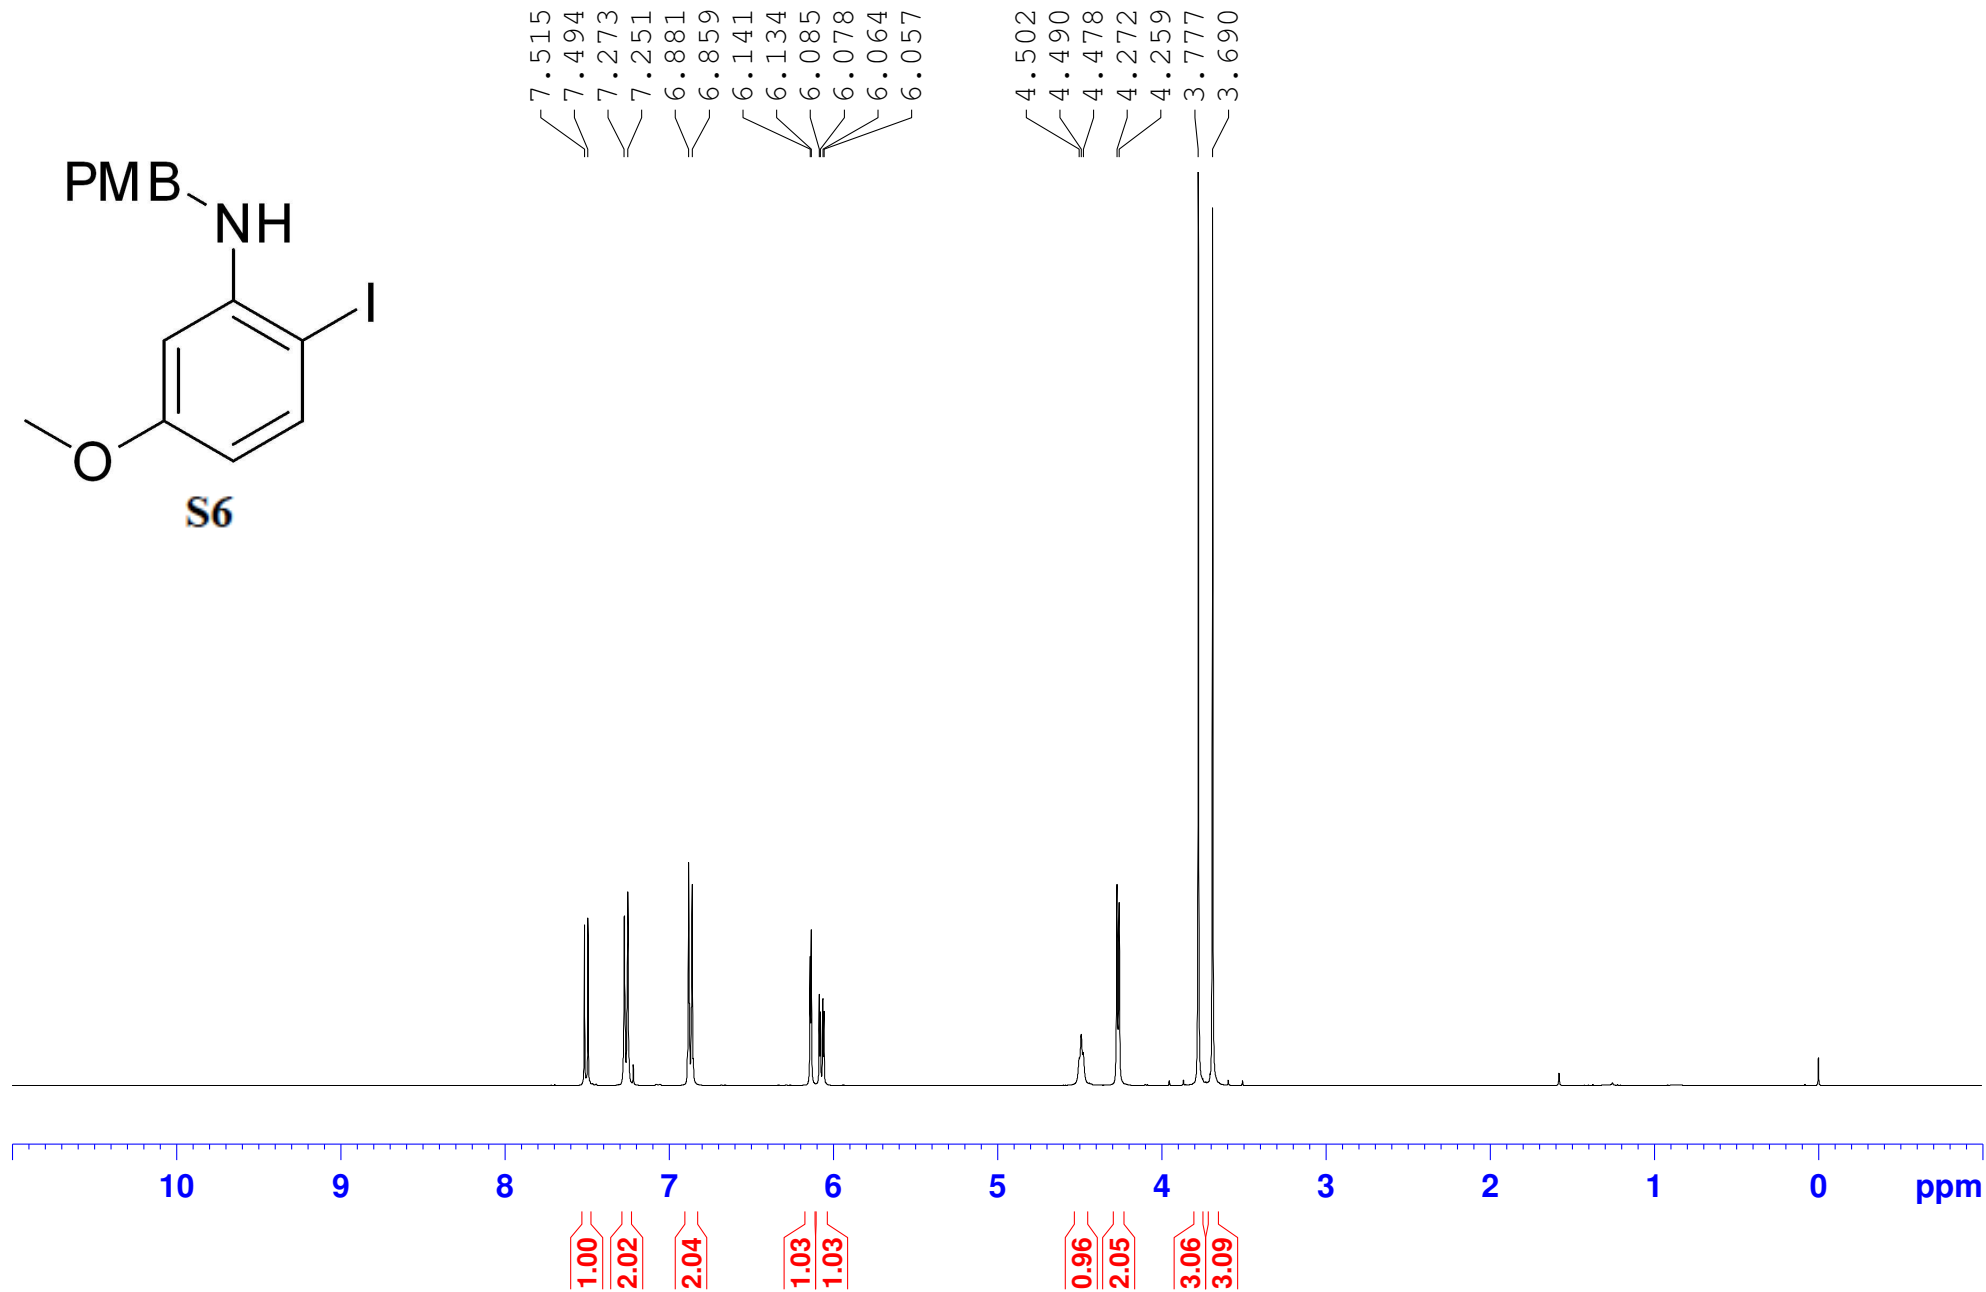

bh090.01.14-17\_C 400b

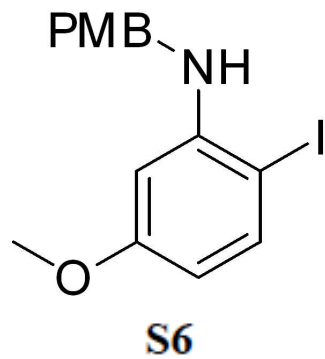

161.19  
158.83  
147.90  
138.86  
130.34  
128.50  
114.04  
104.01  
97.91  
74.50  
55.20  
55.15  
47.76

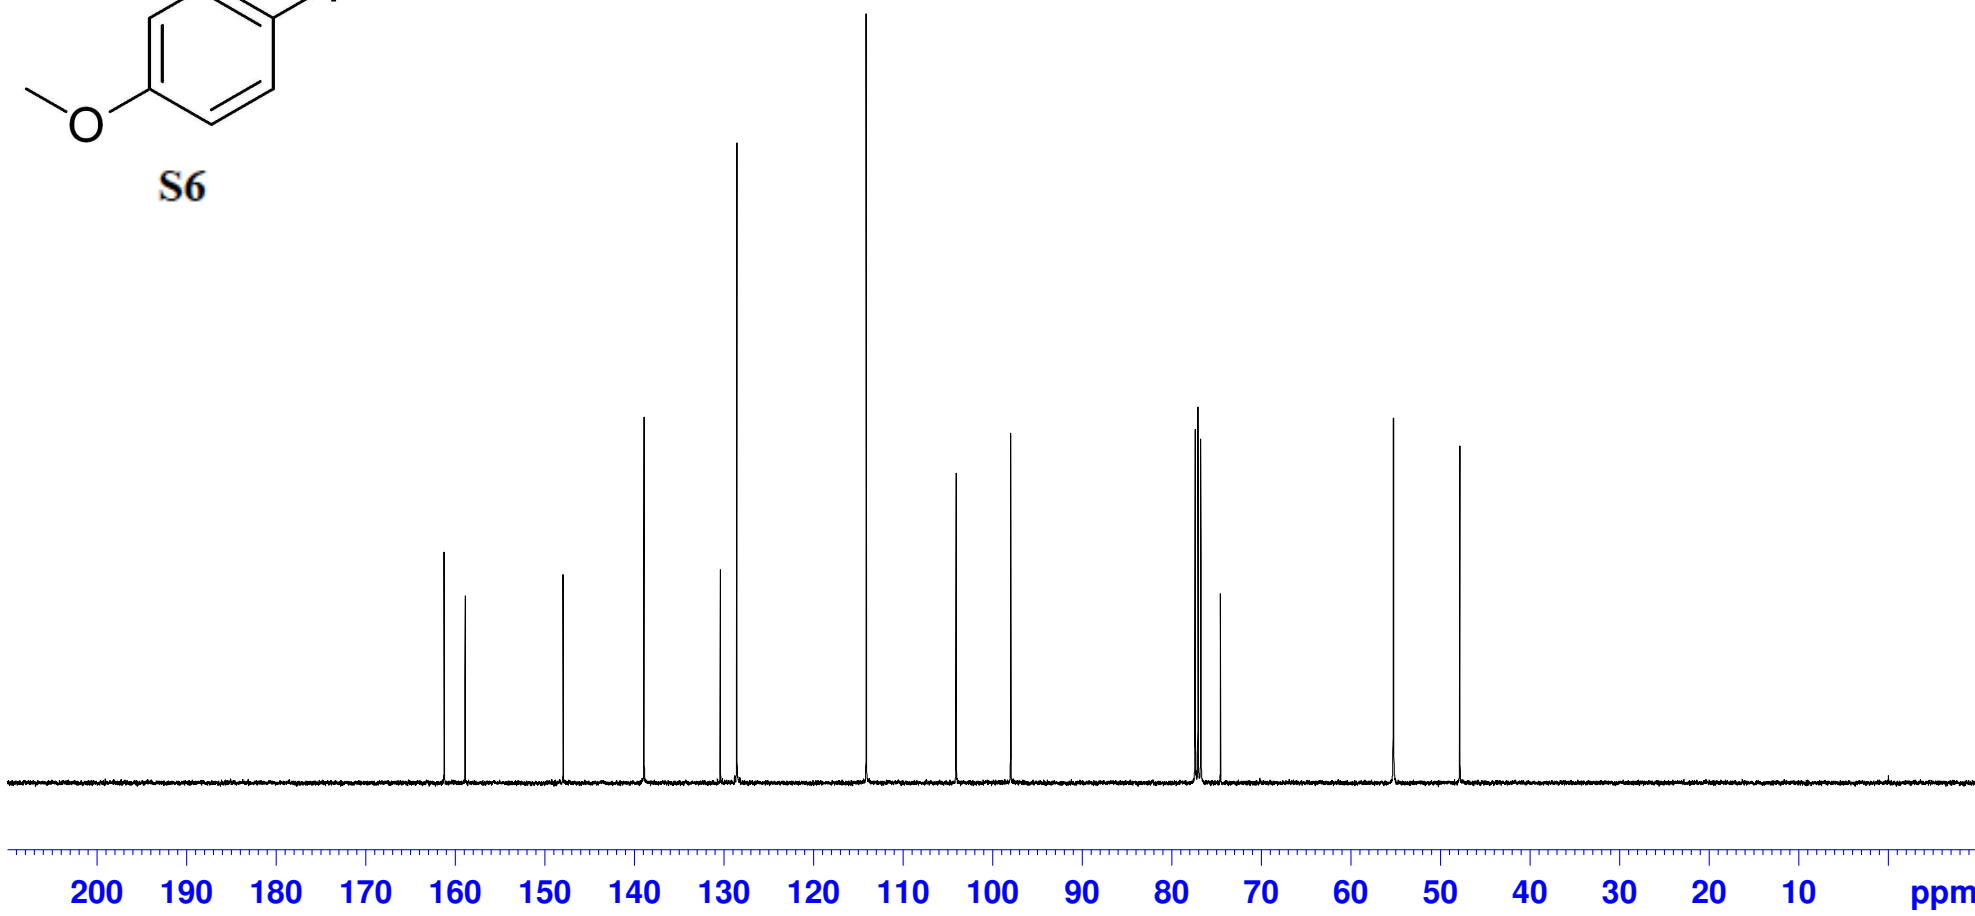

bh090.019 500

7.801  
7.783  
7.620  
7.614  
7.612  
7.609  
7.607  
7.603  
7.602  
7.599  
7.594  
7.589  
7.529  
7.526  
7.516  
7.515  
7.512  
7.502  
7.497  
7.136  
7.132  
7.122  
7.118  
6.793  
6.789  
6.780  
6.776  
6.748  
6.742  
6.731  
6.724  
6.294  
6.288  
5.919  
5.530  
5.501  
3.995  
3.966  
3.773  
3.612  
3.432  
3.427  
3.412  
3.405  
3.390  
3.373  
3.357  
3.351  
3.335  
3.331  
2.669  
2.665  
2.663  
2.646  
2.633  
2.630  
2.626  
2.623

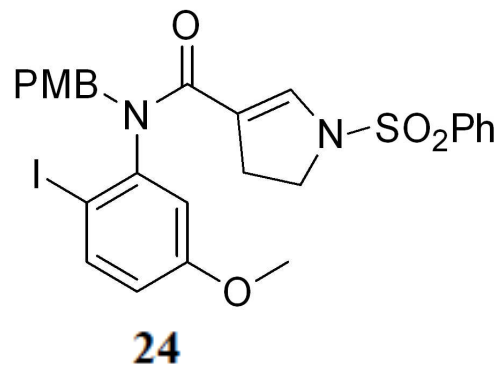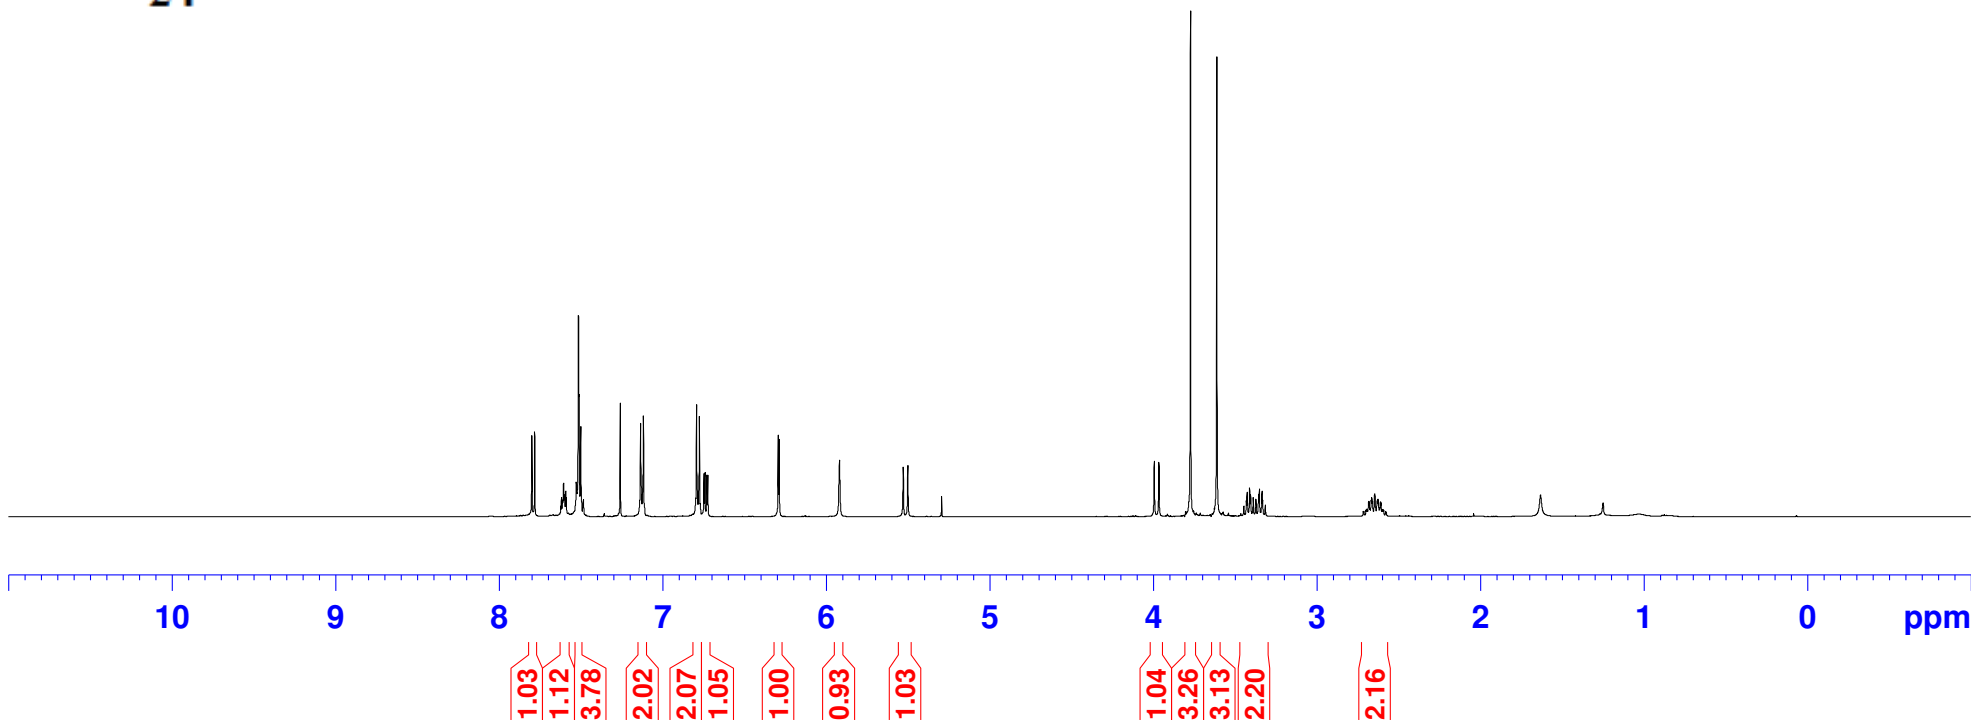

bh090.019\_C 500

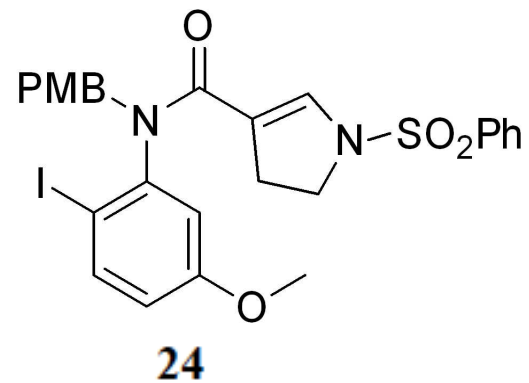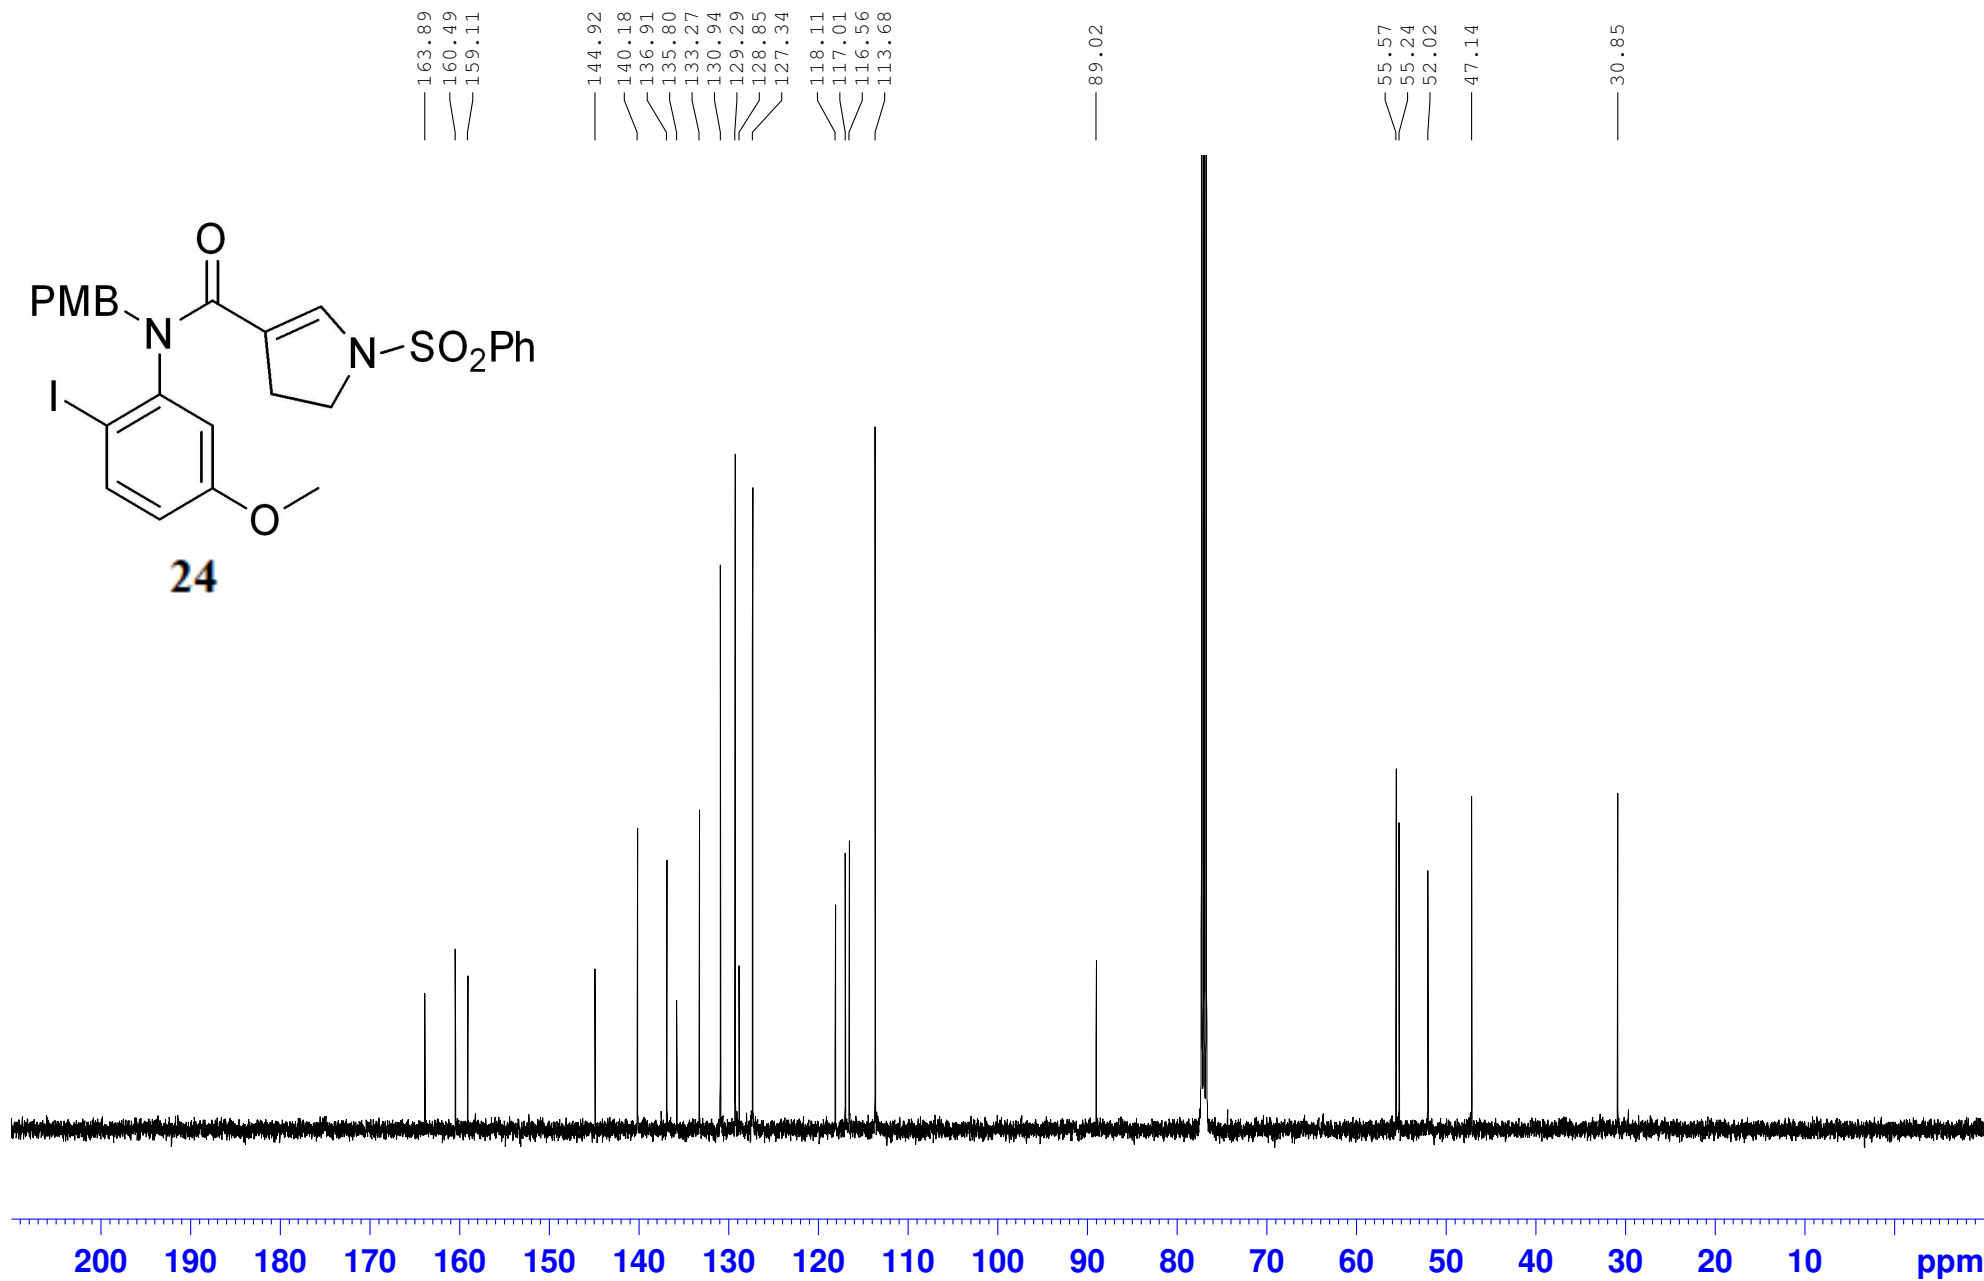

bh090.059.35-42 500

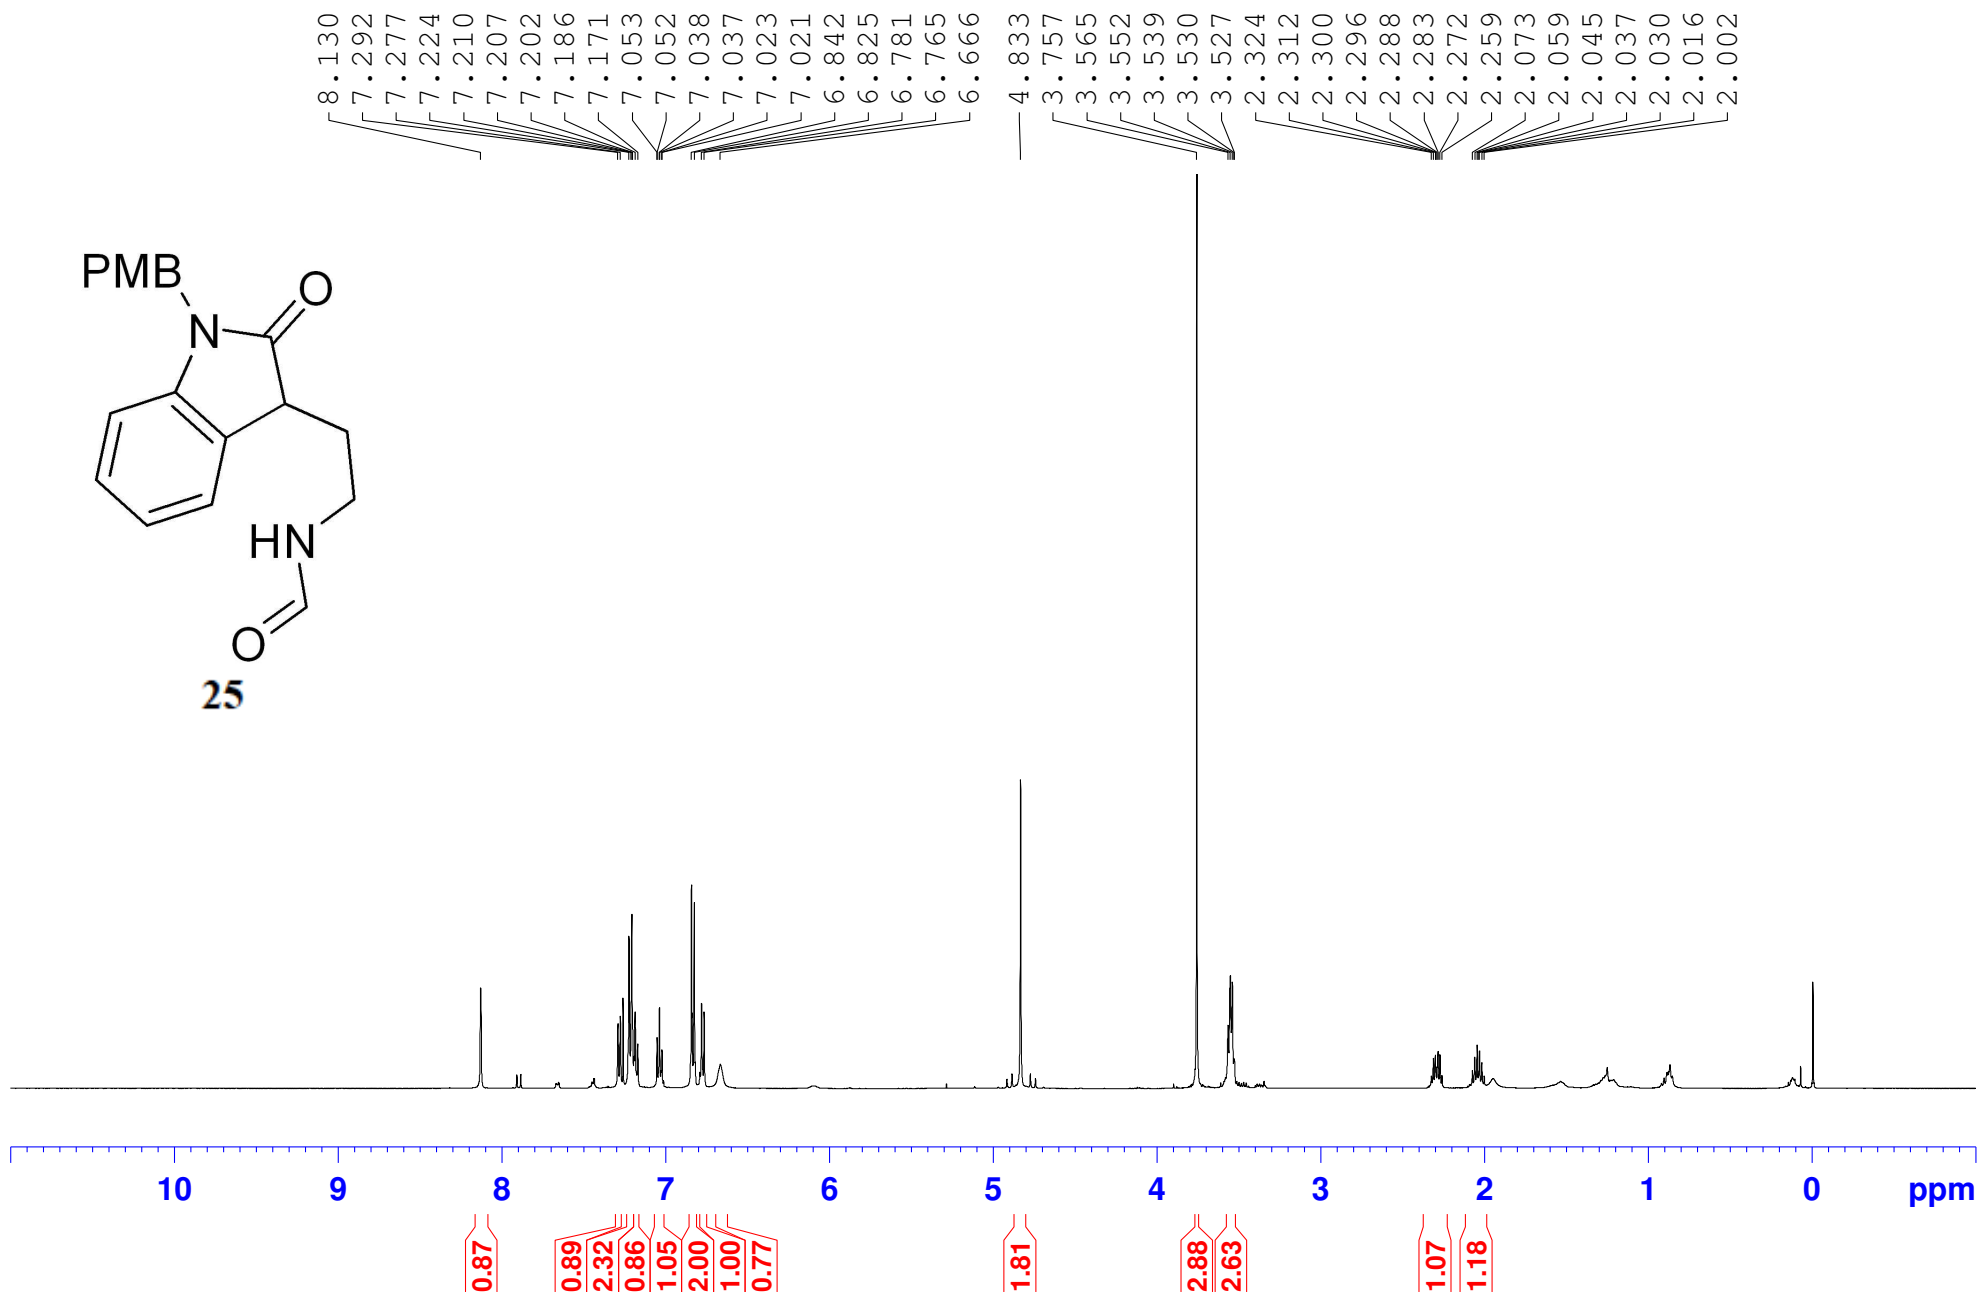

bh090.059.35-42\_C 500

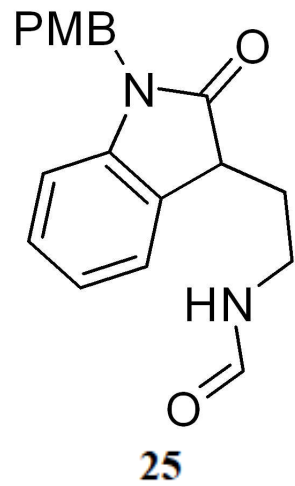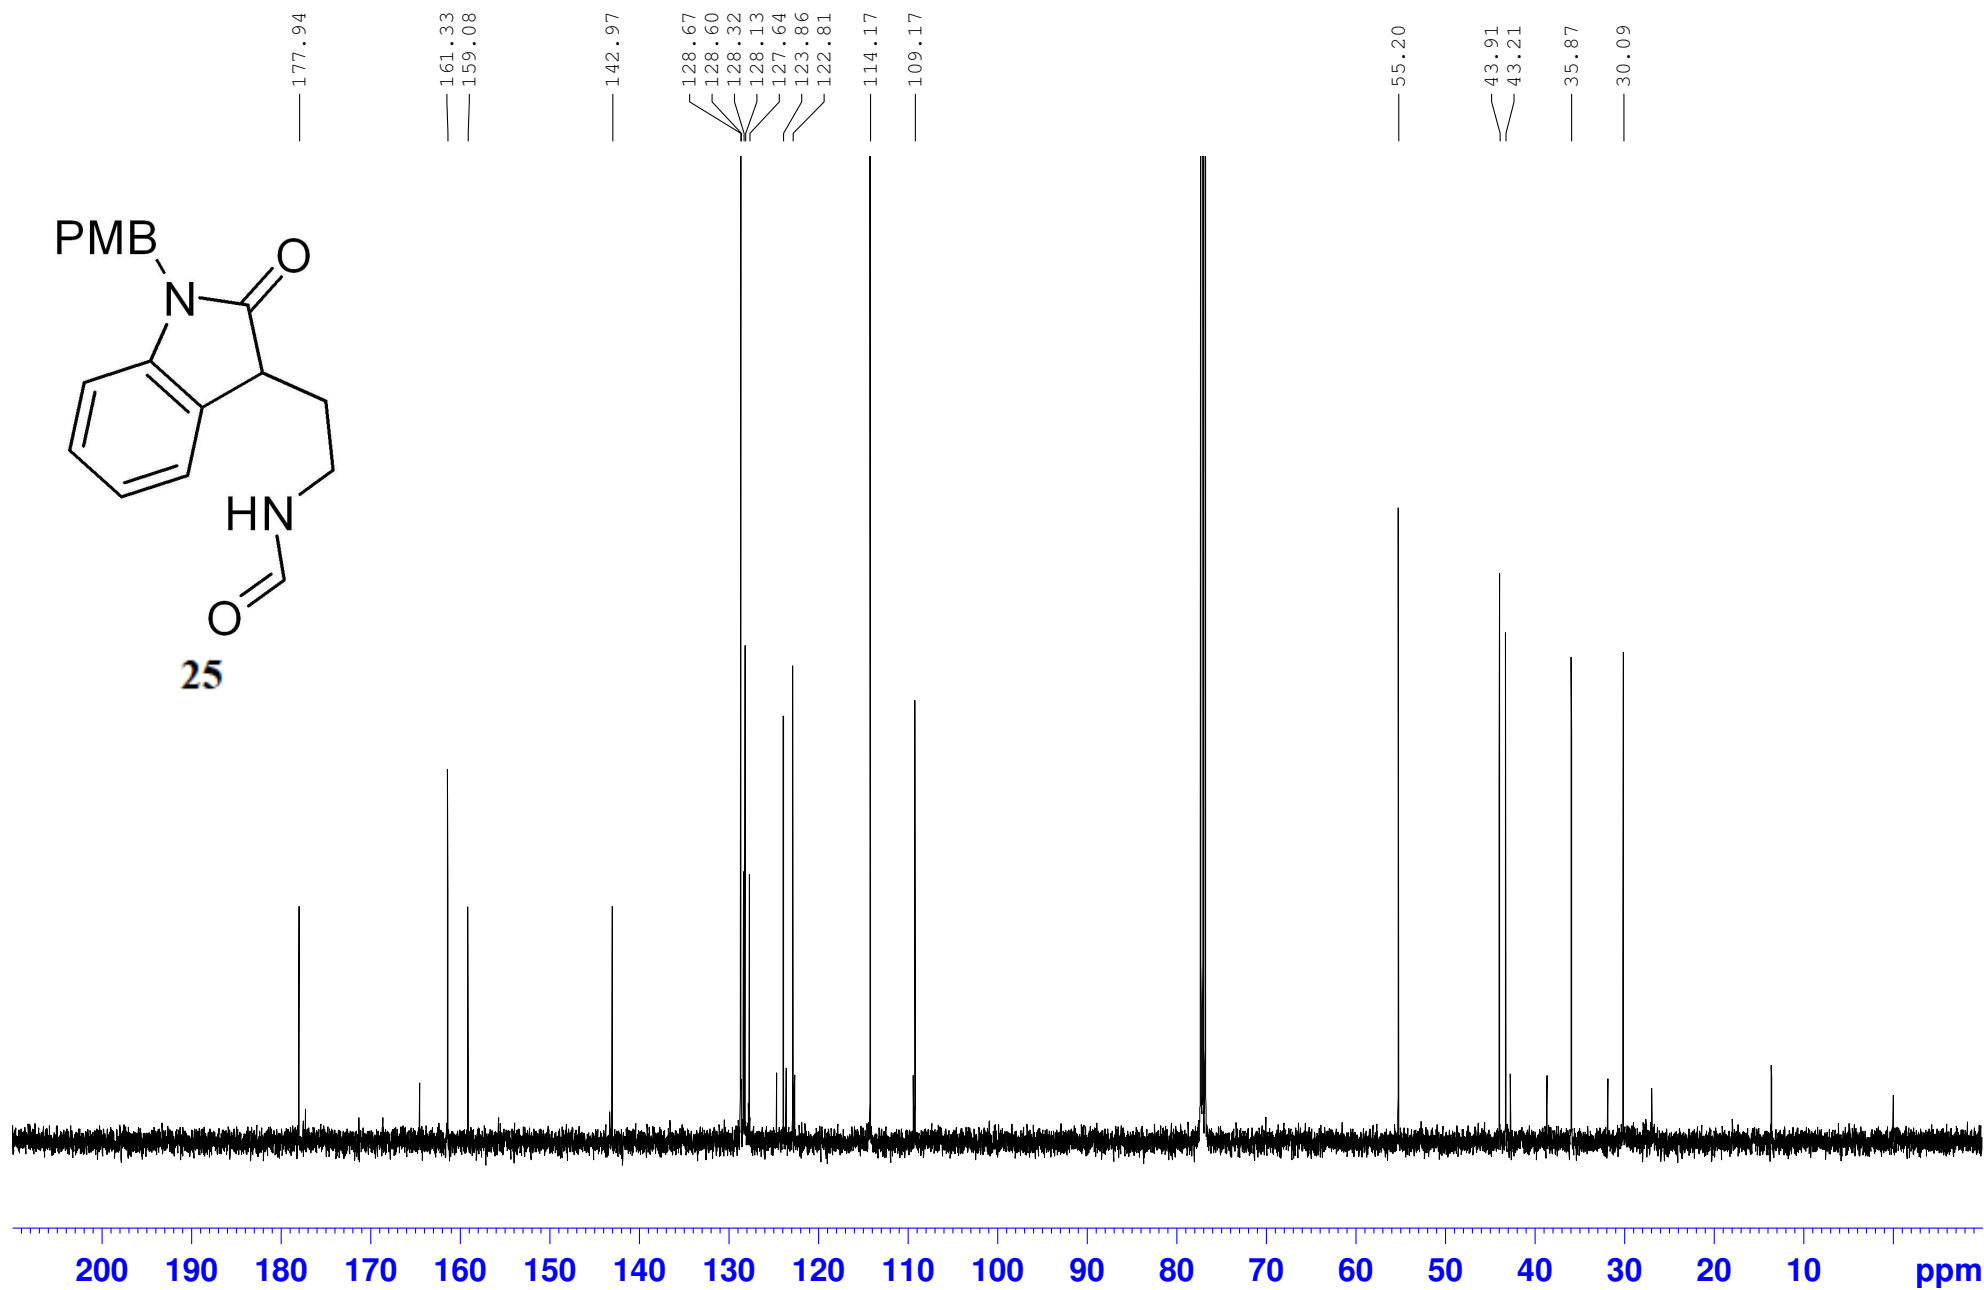



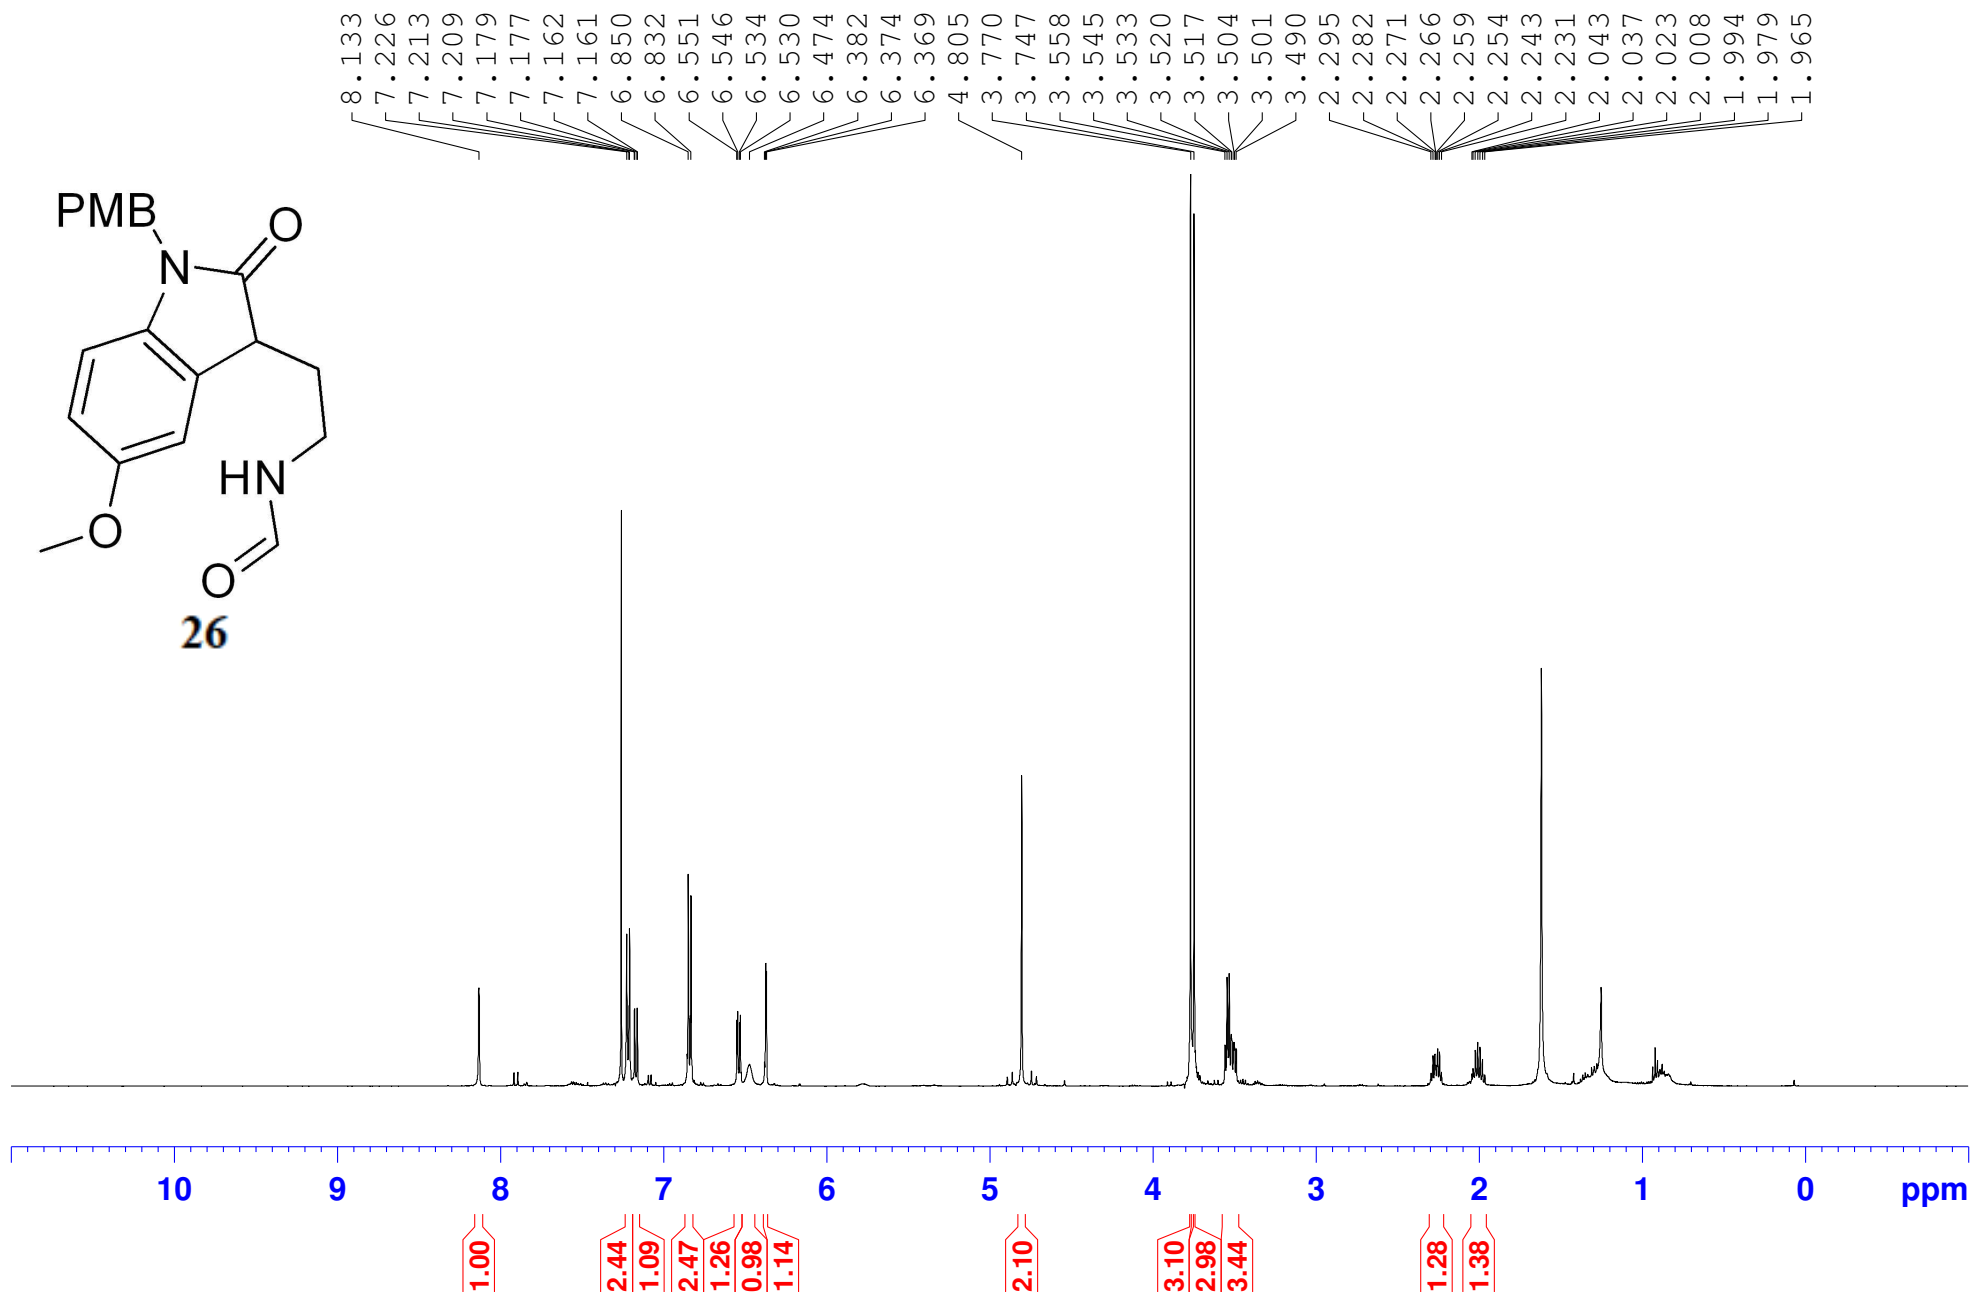

bh090.024.10-15\_C 500

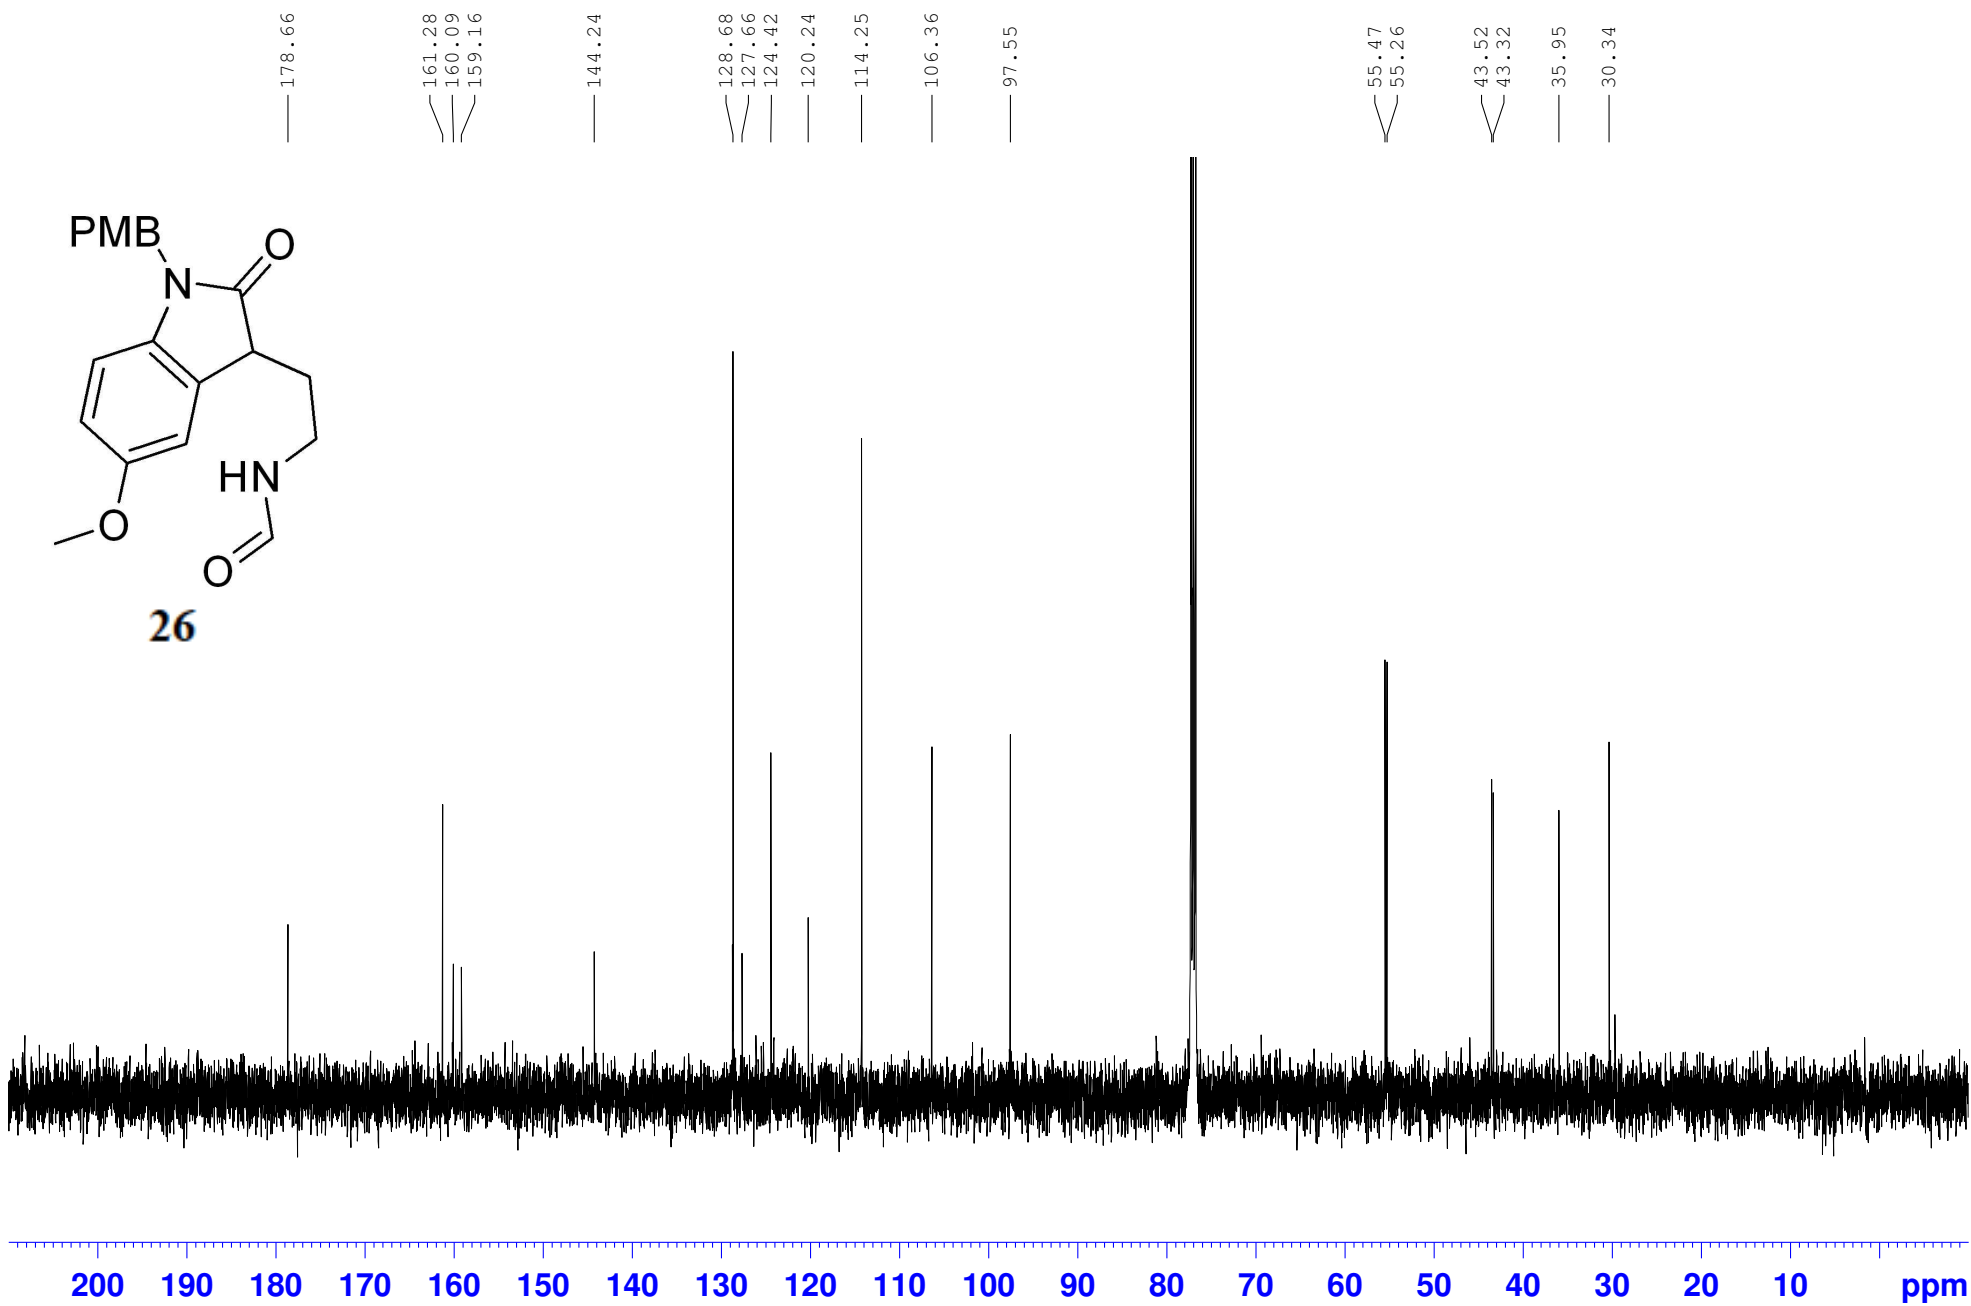

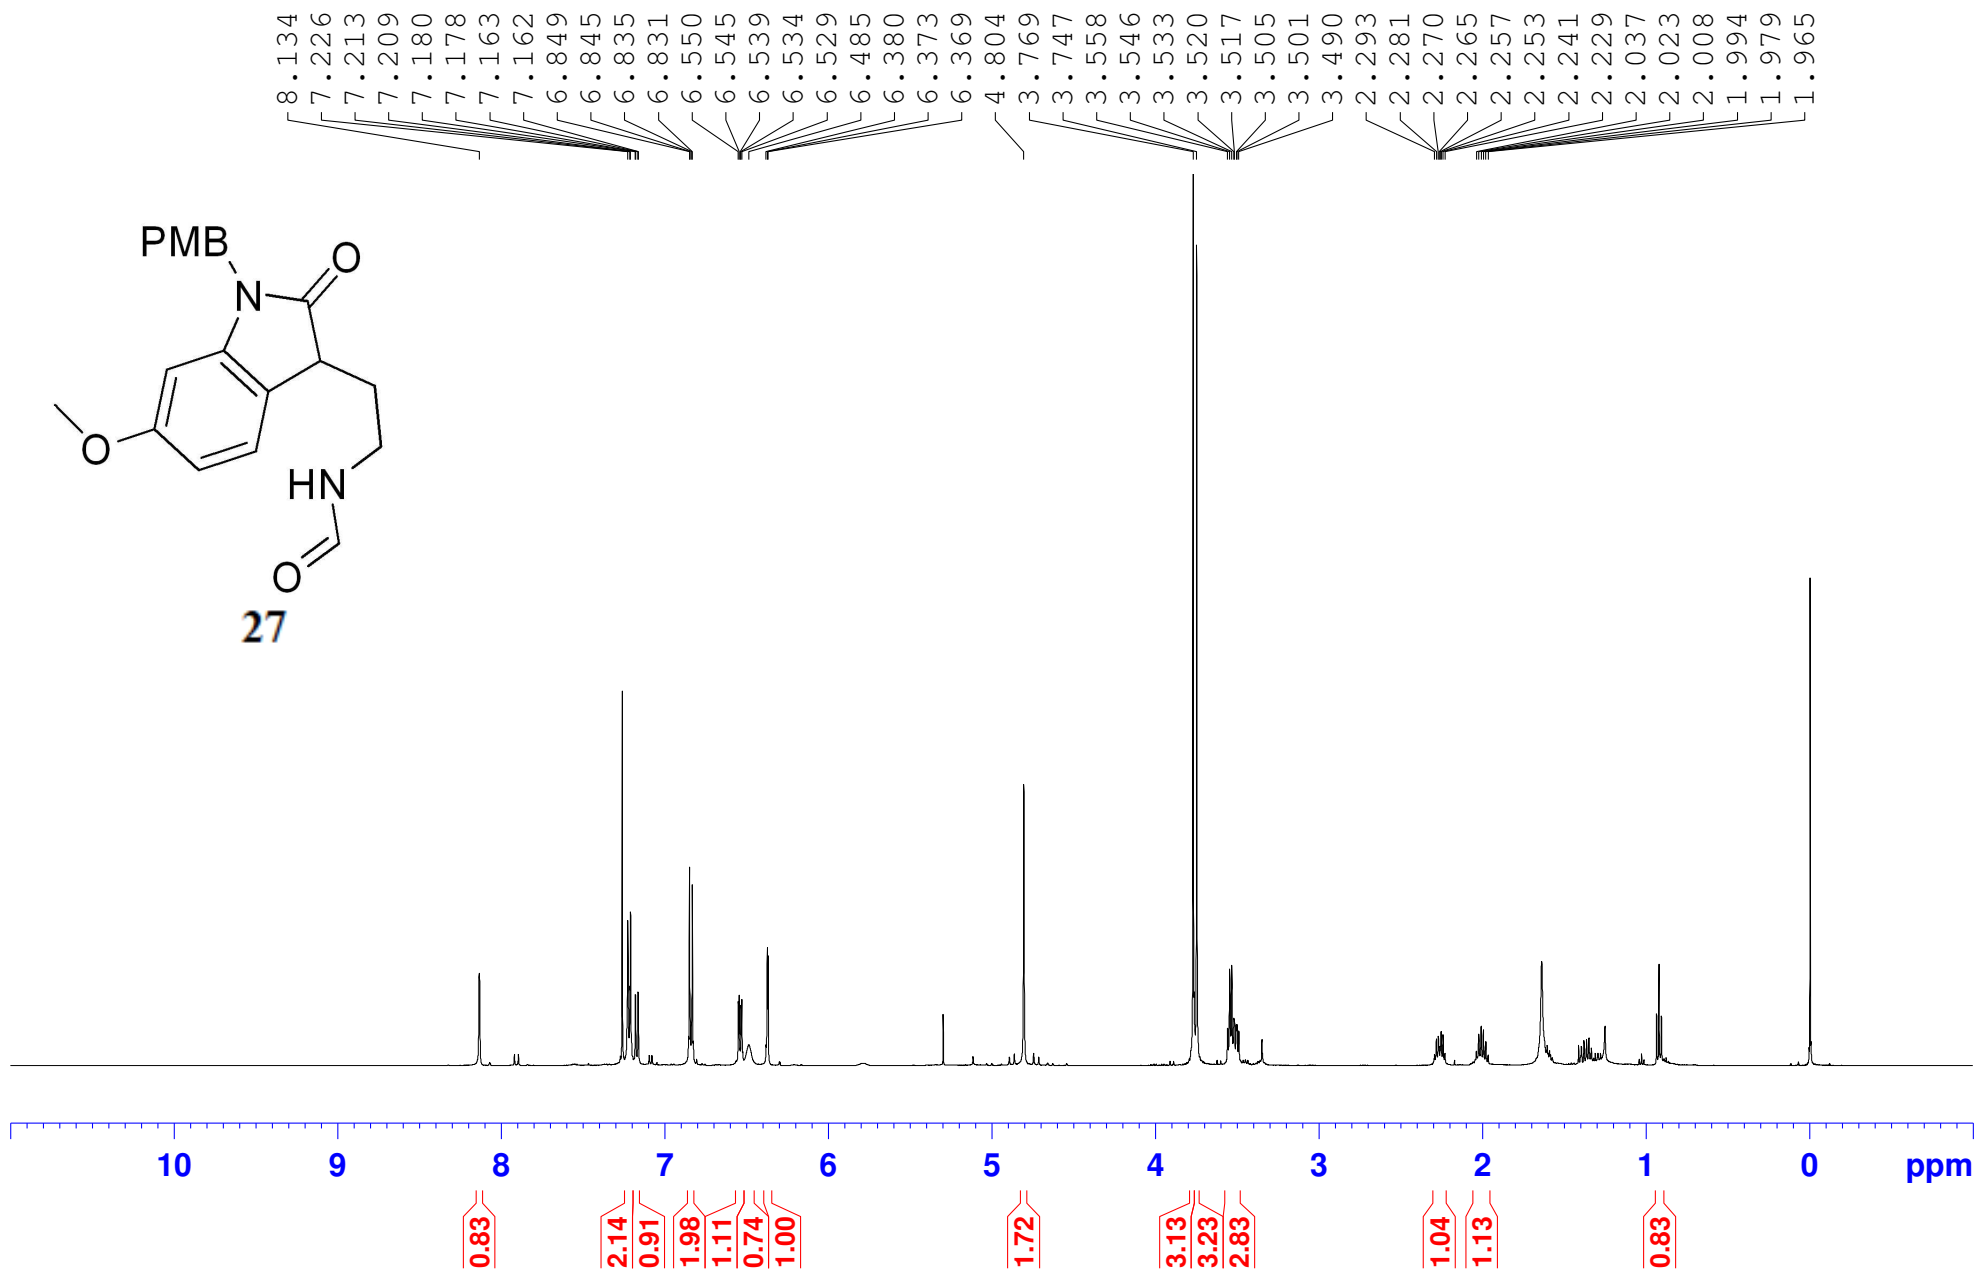

bh090.022.23-28\_C 500

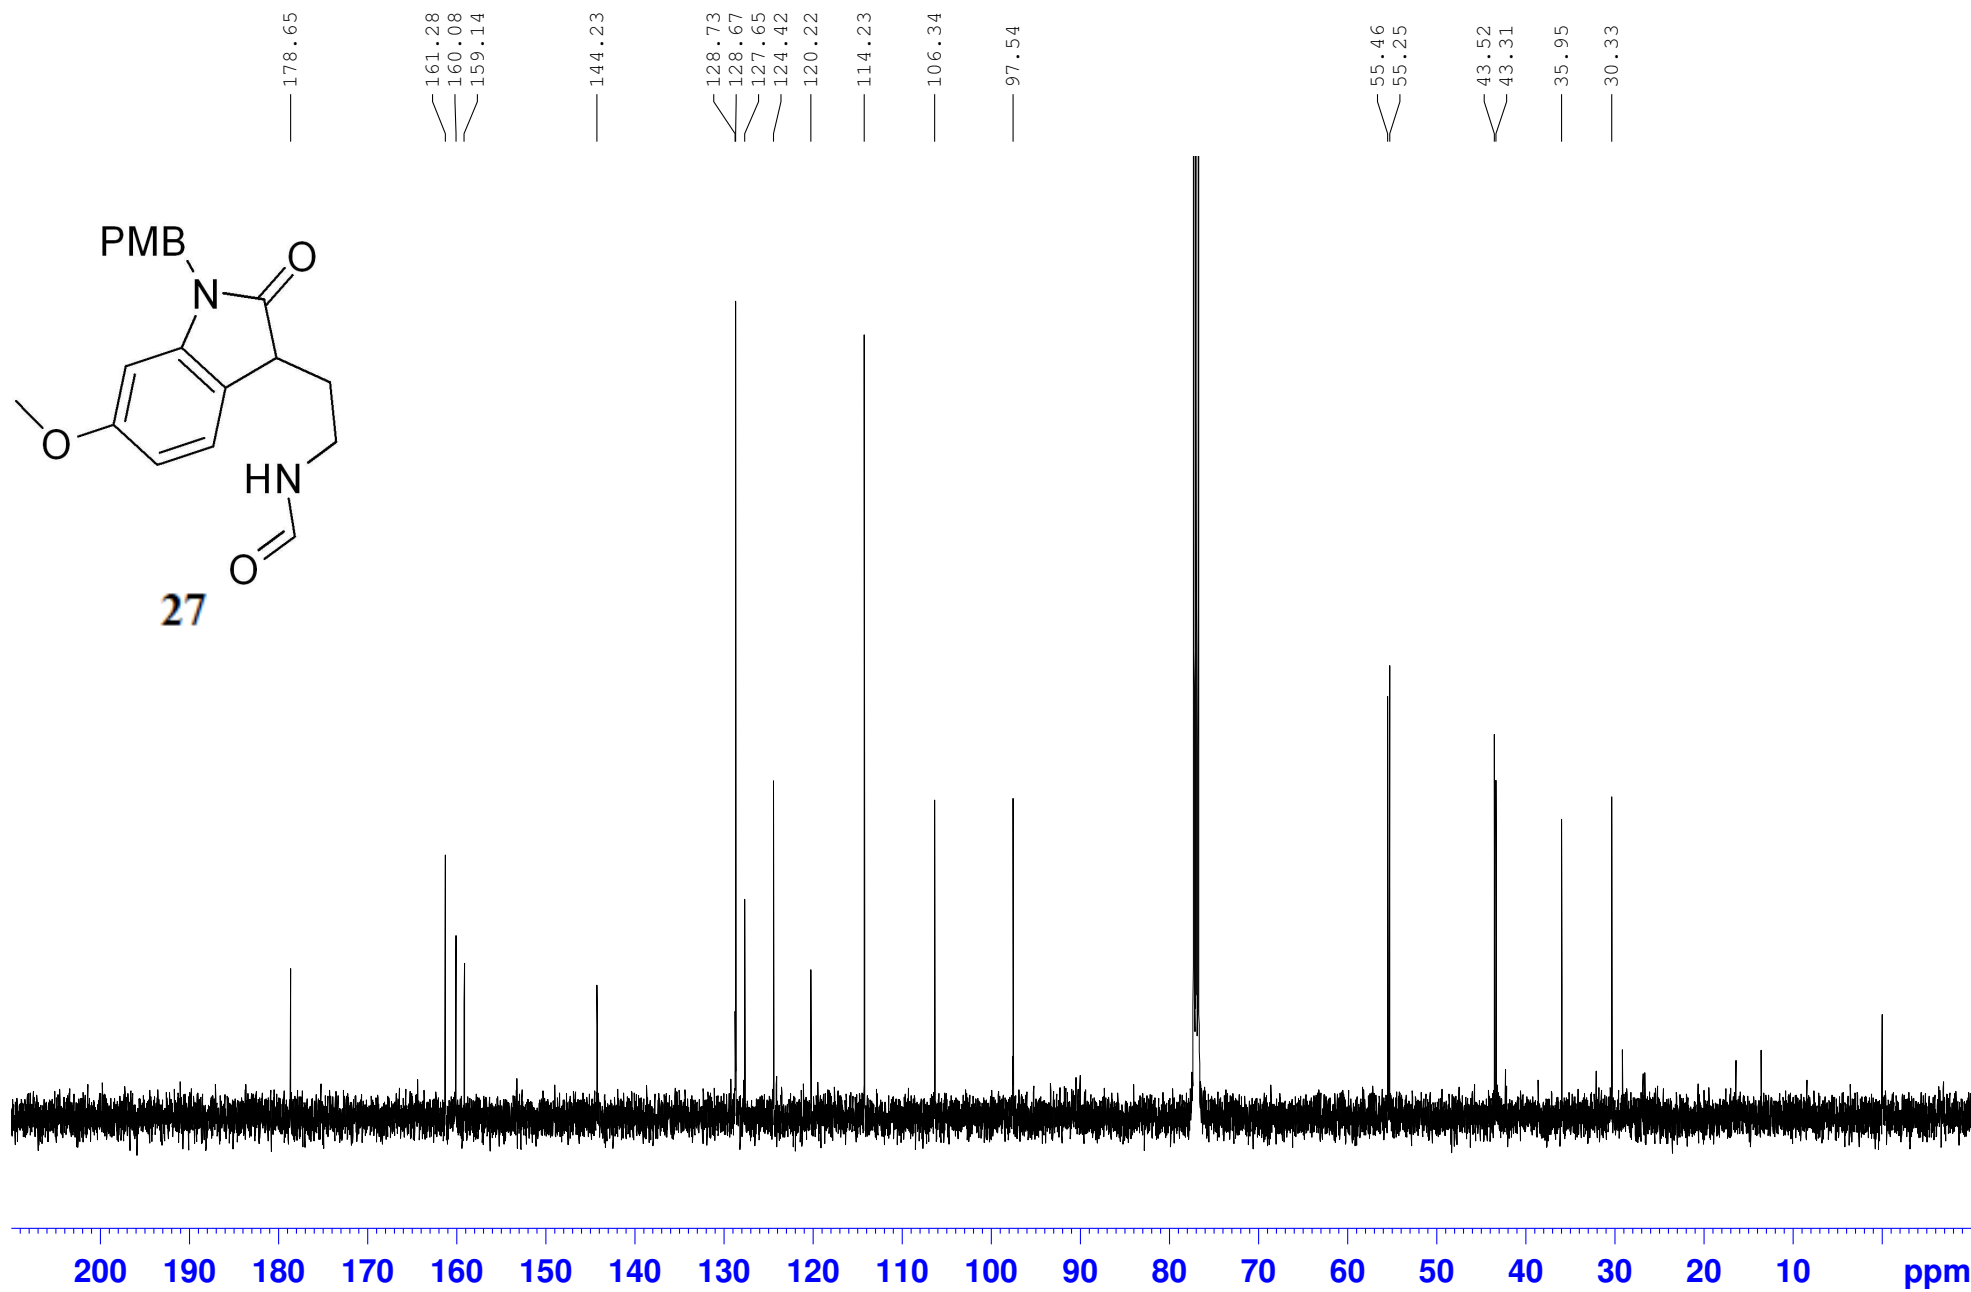

Supplement: Additional file 1 [file 1860-5397-11-181-S1.pdf]
